# Supplementary material for: Development and validation of a score to assess complexity of general internal medicine patients at hospital discharge: a prospective cohort study
Source: PubMed Central journal article supplement — BMJ Open. 2021 May 6;11(5):e041205. doi: 10.1136/bmjopen-2020-041205 (PMC8103941; doi:10.1136/bmjopen-2020-041205), 2021-05-06
Supplement: bmjopen-2020-041205.draft_revisions.pdf [file bmjopen-2020-041205.draft_revisions.pdf]

# BMJ Open

BMJ Open is committed to open peer review. As part of this commitment we make the peer review history of every article we publish publicly available.

When an article is published we post the peer reviewers' comments and the authors' responses online. We also post the versions of the paper that were used during peer review. These are the versions that the peer review comments apply to.

The versions of the paper that follow are the versions that were submitted during the peer review process. They are not the versions of record or the final published versions. They should not be cited or distributed as the published version of this manuscript.

BMJ Open is an open access journal and the full, final, typeset and author-corrected version of record of the manuscript is available on our site with no access controls, subscription charges or pay-per-view fees (<http://bmjopen.bmj.com>).

If you have any questions on BMJ Open's open peer review process please email [info.bmjopen@bmj.com](mailto:info.bmjopen@bmj.com)

# BMJ Open

## Development and validation of a new tool to assess inpatient complexity: The Patient Complexity Assessment (PCA) score

|                               |                                                                                                                                                                                                                                                                                                                                                                                                                                                                                                                                                                                                                       |
|-------------------------------|-----------------------------------------------------------------------------------------------------------------------------------------------------------------------------------------------------------------------------------------------------------------------------------------------------------------------------------------------------------------------------------------------------------------------------------------------------------------------------------------------------------------------------------------------------------------------------------------------------------------------|
| Journal:                      | <i>BMJ Open</i>                                                                                                                                                                                                                                                                                                                                                                                                                                                                                                                                                                                                       |
| Manuscript ID                 | bmjopen-2020-041205                                                                                                                                                                                                                                                                                                                                                                                                                                                                                                                                                                                                   |
| Article Type:                 | Original research                                                                                                                                                                                                                                                                                                                                                                                                                                                                                                                                                                                                     |
| Date Submitted by the Author: | 03-Jun-2020                                                                                                                                                                                                                                                                                                                                                                                                                                                                                                                                                                                                           |
| Complete List of Authors:     | Liechti, Fabian; Inselspital University Hospital Bern, Department of General Internal Medicine<br>Beck, Thomas; Inselspital University Hospital Bern, Department of General Internal Medicine<br>Ruetsche, Adrian; Direction of Technology and Innovation, University Hospital Bern, Switzerland<br>Roumet, Marie; University of Bern, CTU Bern<br>Limacher, Andreas; University of Bern, CTU Bern<br>Tritschler, Tobias ; Inselspital University Hospital Bern,<br>Donzé, Jacques; Inselspital University Hospital Bern, Department of General Internal Medicine; Neuchâtel Hospital Network, Department of medicine |
| Keywords:                     | PRIMARY CARE, GENERAL MEDICINE (see Internal Medicine), Quality in health care < HEALTH SERVICES ADMINISTRATION & MANAGEMENT, SOCIAL MEDICINE, INTERNAL MEDICINE                                                                                                                                                                                                                                                                                                                                                                                                                                                      |
|                               |                                                                                                                                                                                                                                                                                                                                                                                                                                                                                                                                                                                                                       |

SCHOLARONE™  
Manuscripts

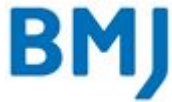

I, the Submitting Author has the right to grant and does grant on behalf of all authors of the Work (as defined in the below author licence), an exclusive licence and/or a non-exclusive licence for contributions from authors who are: i) UK Crown employees; ii) where BMJ has agreed a CC-BY licence shall apply, and/or iii) in accordance with the terms applicable for US Federal Government officers or employees acting as part of their official duties; on a worldwide, perpetual, irrevocable, royalty-free basis to BMJ Publishing Group Ltd ("BMJ") its licensees and where the relevant Journal is co-owned by BMJ to the co-owners of the Journal, to publish the Work in this journal and any other BMJ products and to exploit all rights, as set out in our [licence](#).

The Submitting Author accepts and understands that any supply made under these terms is made by BMJ to the Submitting Author unless you are acting as an employee on behalf of your employer or a postgraduate student of an affiliated institution which is paying any applicable article publishing charge ("APC") for Open Access articles. Where the Submitting Author wishes to make the Work available on an Open Access basis (and intends to pay the relevant APC), the terms of reuse of such Open Access shall be governed by a Creative Commons licence – details of these licences and which [Creative Commons](#) licence will apply to this Work are set out in our licence referred to above.

Other than as permitted in any relevant BMJ Author's Self Archiving Policies, I confirm this Work has not been accepted for publication elsewhere, is not being considered for publication elsewhere and does not duplicate material already published. I confirm all authors consent to publication of this Work and authorise the granting of this licence.

1  
2  
3 **DEVELOPMENT AND VALIDATION OF A NEW TOOL TO ASSESS INPATIENT COMPLEXITY: THE**  
4  
5 **PATIENT COMPLEXITY ASSESSMENT (PCA) SCORE**  
6  
7  
8

9 **Authors:** Fabian D. Liechti, MD-PhD<sup>1</sup>, Thomas Beck, MD<sup>1</sup>, Adrian Rütscbe, MD<sup>2</sup>, Marie C. Roumet<sup>3</sup>,  
10  
11 Andreas Limacher<sup>3</sup>, Tobias Tritschler, MD<sup>1,4</sup>, Jacques D. Donzé, MD, MSc<sup>1,5,6,7</sup>  
12  
13

14 **Author Affiliations:**  
15

16  
17 <sup>1</sup> Department of General Internal Medicine, Inselspital, Bern University Hospital, University of Bern, Bern,  
18  
19 Switzerland  
20

21 <sup>2</sup> Department of Technology and Innovation, Inselspital, Bern University Hospital, University of Bern, Bern,  
22  
23 Switzerland  
24

25 <sup>3</sup> CTU Bern, University of Bern, Bern, Switzerland  
26  
27

28 <sup>4</sup> Department of Medicine, Ottawa Hospital Research Institute, University of Ottawa, Ontario, Canada  
29  
30

31 <sup>5</sup> Division of General Medicine, Brigham and Women's Hospital, Boston, Massachusetts, USA  
32  
33

34 <sup>6</sup> Harvard Medical School, Boston, Massachusetts, USA  
35

36 <sup>7</sup> Neuchâtel Hospital Network, Department of medicine, Neuchâtel, Switzerland  
37  
38  
39  
40

41 **Corresponding author:** Fabian D. Liechti, Department of General Internal Medicine, Inselspital, Bern  
42  
43 University Hospital, 3010 Bern, Switzerland, e-mail: fabian.liechti@insel.ch  
44

45  
46 Phone: +41 (0)31 632 21 11  
47

48 **Word count:** 3080  
49  
50  
51  
52  
53  
54  
55  
56  
57  
58  
59  
60

1  
2  
3 **Author contributions:** All authors had full access to all the data in the study and take responsibility for  
4 the integrity of the data and the accuracy of the data analysis. Study concept and design: JDD. Acquisition  
5 of data: TB, AR, JDD. Analysis and interpretation of data: All authors. Drafting of the manuscript: FDL and  
6 JDD. Critical revision of the manuscript for important intellectual content: All authors. Statistical analysis:  
7 MCR. Administrative, technical, and material support: JDD.  
8  
9  
10  
11

12  
13 **Funding:** This work was supported by SGIM foundation. JDD is supported by Swiss National Science  
14 Foundation (grant number 170656). TT is supported by an Early Postdoc.Mobility Award from the Swiss  
15 National Science Foundation (SNSF P2ZHP3\_177999) and a Fellowship Award from the CanVECTOR  
16 Network.  
17  
18  
19  
20

21 **Competing interests:** None declared.  
22  
23

24 **Patient consent for publication:** Not required.  
25  
26  
27  
28  
29  
30  
31  
32  
33  
34  
35  
36  
37  
38  
39  
40  
41  
42  
43  
44  
45  
46  
47  
48  
49  
50  
51  
52  
53  
54  
55  
56  
57  
58  
59  
60

## ABSTRACT

**Objective:** We aimed to develop and validate a score to assess inpatient complexity and compare its performance with two currently used but not validated tools to estimate complexity (i.e., Charlson Comorbidity Index [CCI], patient clinical complexity level [PCCL]).

**Methods:** Consecutive patients discharged from the department of medicine of a tertiary care hospital were prospectively included into a derivation cohort from October 1, 2016 to February 16, 2017 (n=1,407), and a temporal validation cohort from February 17, 2017, to March 31, 2017 (n=482). The physician in charge assessed complexity. Potential predictors comprised 52 parameters from the electronic health record such as health factors and hospital care usage. We fit a logistic regression model with backward selection to develop a prediction model and derive a score. We assessed and compared performance of model and score in internal and external validation using measures of discrimination and calibration.

**Results:** Overall, 447 of 1,407 patients (32%) in the derivation cohort, and 116 of 482 patients (24%) in the validation cohort were identified as complex. Eleven variables independently associated with complexity were included in the score. Using a cut-off of  $\geq 24$  score points to define high-risk patients, specificity was 81% and sensitivity 57% in the validation cohort. The score's area under the receiver operating characteristic (AUROC) curve was 0.78 in both the derivation and validation cohort. In comparison, the CCI had an AUROC between 0.58 and 0.61, and the PCCL between 0.64 and 0.69, respectively.

**Conclusions:** We derived and internally and externally validated a score that reflects patient complexity in the hospital setting, performed better than other tools, and could help monitoring complex patients.

### STRENGTHS AND LIMITATIONS OF THIS STUDY

- This is a prospective cohort study of consecutive, unselected, adult inpatients discharged from the department of medicine of a large university hospital.
- We derived and validated an easily usable score that accurately assesses patient complexity in medical inpatients that may help monitoring the proportion of complex patients.
- The reference standard used to define complexity was the physician's judgment, which per definition is partly subjective.
- The PCA score has been developed at a single tertiary hospital and may not consider a comprehensive list of important predictors.
- The PCA score includes values available only at discharge and not modifiable predictors are.

**Keywords:** primary care, general medicine, quality in health care, social medicine, internal medicine

## INTRODUCTION

Up to one third of patients are estimated to be complex in the primary care setting, while this proportion is not well known in the hospital setting.[1-3] Complexity is not limited to multimorbidity and chronicity of disease but depends also on multiple other aspects, including psychological, social, economic and environmental factors.[1,2,4-6] Complex patients challenge the current structures, e.g., they have a higher probability of future emergency department utilization (without higher mortality rates) and show suboptimal use of the health care system.[2,7-9] Identifying complex patients is of economic, epidemiological and social importance because it may help to better allocate resources and improve health care utilization.[4,10]

The only available assessment method to identify complex inpatients is currently the physician's assessment, which limits the monitoring of patient complexity over time.[9,11,12] The Charlson Comorbidity Index (CCI), originally developed and validated to predict mortality,[13] has been assessed as a proxy for patient complexity in the primary care setting. However, agreement between the primary care physician's assessment and the CCI to identify complex patients was only modest.[1,2,4] No such assessment has been yet performed in the hospital setting.

In order to simplify and standardize the identification of complex patients, we aimed to develop and validate a new score to help identifying the most complex inpatients (Patient Complexity Assessment, PCA score) using readily available administrative and clinical data. Our hypothesis was that some data routinely collected during a hospitalization can be used as a valuable surrogate to physician's assessment. We then compared the performance of the newly developed PCA score to the CCI, and the patient clinical complexity level (PCCL) used in the Swiss DRG system to allocate reimbursement according to multimorbidity.[13,14]



## METHODS

### Study design and participants

This study was a prospective cohort of consecutive, unselected, adult inpatients discharged from the department of medicine of a large University hospital (Inselspital, Bern University Hospital, Bern, Switzerland) between October 1, 2016 and March 31, 2017. The only exclusion criterion was a previous study inclusion. We originally planned to consider around 35 variables in the prediction model. With an estimated proportion of complex patients of one fourth, we preset the sample size of the derivation cohort to be 1,400 (rule of thumb of 10 outcomes per variable tested).[15,16] Patients enrolled before February 16, 2017 were allocated to the derivation sample (derivation and internal validation cohort), and patients enrolled after this date were allocated to an external validation sample (temporal validation cohort). During their first admission, all patients included in the study gave their written general consent to the use of their routine data for research purposes. The study was approved by the local ethics committee (Kantonale Ethikkommission Bern, ID 2016-01319). We reported the study in accordance with the Transparent Reporting of a Multivariable Prediction Model for Individual Prognosis Or Diagnosis (TRIPOD) statement.[17]

### Patient and public involvement

No patient involved.

### Study outcome and predictor variables

The primary outcome was the true complexity of hospitalized patients based on the treating physician's judgement (discharging resident physician or supervising consultant if the resident physician's assessment was absent). Complex patients were defined as those using more resources, time and/or effort while hospitalized. The outcome was prospectively collected by a trained study nurse at time of patient's discharge.

The CCI is calculated by addition of score points for specific diagnoses and was originally developed to predict 10-year survival.[13,18] The PCCL was derived from the electronic health record (no complication or comorbidity: 0; light complication or comorbidity: 1; moderate complication or comorbidity: 2; severe complication or comorbidity: 3; very severe complication or comorbidity: 4) and is defined by SwissDRG.[19,20]

1  
2  
3 For all patients, information regarding International Classification of Disease (ICD) codes and other  
4 potential predictors for patient complexity were collected retrospectively through the electronic health  
5 record of the hospital. Predictor variables have been selected based on a previous survey study that  
6 asked 111 physicians about patient complexity,[21] and on a selection of readily available potential  
7 predictors. Variables that were not routinely collected were removed (i.e. variables with more than 25%  
8 missing data, such as aspartate amino transferase, C-reactive protein, and albumin at discharge).  
9  
10 Collinearity between variables was assessed using Pearson correlation coefficients. In case of strong  
11 correlation ( $r > 0.7$ ), only the strongest univariate predictor was kept. A final list of 52 predictors was  
12 considered in predicting complexity: baseline demographic information (age, gender, living area (rural  
13 versus urban, defined according to the Swiss Federal Statistical Office based on the patient's place of  
14 residence ), marital status, institutional care before admission, nationality (Swiss vs. non-Swiss), hospital  
15 variables (urgent vs. elective admission, number of previous hospitalization in the last 12 months, patient  
16 destination [death, home, other hospital, nursing home, rehabilitation, other], stay on the intensive care  
17 unit, internal transfer), drugs (for each group of the Anatomical, Therapeutic and Chemical [ATC]  
18 classification categories) at admission and at discharge and polypharmacy ( $\geq 10$  drugs, at admission and  
19 discharge ), main diagnosis (cancer, chronic obstructive pulmonary disease, dementia, depression, heart  
20 failure, pneumonia, sepsis, stroke, substance abuse, syncope, malnutrition, based on the Tenth Revision  
21 of the International Statistical Classification of Diseases and Related Health Problems [ICD-10] code),  
22 number of diagnoses at discharge, CCI, laboratory values (hemoglobin, leucocyte count and thrombocyte  
23 count, serum sodium and creatinine) at admission and discharge, number of interventions and costs  
24 (normal vs. high costs, i.e.,  $\geq$  the 75<sup>th</sup> empirical percentile value) during hospitalization of blood products,  
25 drugs, imaging procedures, physiotherapy, and nursing workload.  
26  
27  
28  
29  
30  
31  
32  
33  
34  
35  
36  
37  
38  
39  
40  
41  
42  
43  
44  
45

### 46 **Missing data**

47 When missing, the second value of hemoglobin and creatinine was assumed to be identical to the first  
48 value. When missing, the second value of sodium and platelet count was considered normal. For other  
49 potential predictor variables, we assumed data to be missing at random and imputed missing data using  
50 single imputation by chained equations. To compare performance measures of the PCA with the CCI and  
51 PCCL, patients with missing values for the PCCL variable (n=3 for the derivation, n=11 for the validation  
52 dataset) were removed prior to analysis.  
53  
54  
55  
56  
57  
58  
59  
60

### Statistical analysis

Multivariable logistic regression analysis with backward selection was used in the derivation set to predict complexity based on 52 potential predictor variables registered during hospitalization, removing variables with a p-value >0.1. Calibration of the final model was evaluated by constructing a calibration curve, estimating the calibration slope, calculating the difference between the mean observed proportion and mean predicted proportion of patients with high complexity (calibration-in-the-large) and the Brier score (overall measure of accuracy) in the derivation and validation set. The predictors from the final model were used to create a comprehensible score using the regression coefficient-based scoring technique.[22] Beta-coefficients were divided by the lowest coefficient and rounded up to the closest integer to generate score points, indicating increasing risk by higher scores. The discriminatory power of the score was assessed by calculating the area under the receiver operating characteristic (AUROC) curve.

The validity of performance measures was investigated by performing internal and external validation. For internal validation we used 1000 bootstrap samples, drawing samples with replacement from the derivation sample.[23] The bootstrap-corrected performance estimates were calculated by subtracting the optimism from the performance of the original model. The 95% confidence intervals (CI) for the bootstrapped performance measures were derived using the percentile method. External validation was made by estimating the same performance measures in the external validation cohort (temporal validation).

The clinical usefulness of the developed score was assessed with a decision-curve analysis investigating whether the use of the complexity score instead of the CCI alone was associated with benefit gains relative to the prediction complexity.[24]

Applying PCA, CCI and PCCL, we calculated the score of each patient and split the patient sample into a high and a low risk group. The reference point (cut-off) of each scoring system was chosen in order to make the frequency of patients in the high-risk category as close as possible to 30% (i.e. approximating the frequency of observed complex patients). To determine the accuracy of this method to predict complexity, we estimated sensitivity, specificity, and positive and negative predictive value in both the derivation and validation set for PCA and in the derivation set for CCI and PCCL.

R version 3.3.1 was used for statistical analysis.

## RESULTS

A total of 1,889 patients were included in the study (figure 1). Patients enrolled before February 16, 2017 were allocated to the derivation sample (n = 1,407), patients enrolled after this date (n = 482) were allocated to the temporal validation sample. In the derivation cohort, 447 patients (31.8%) were reported as complex, and 116 (24.1%) patients in the validation cohort. The patients in the two cohorts presented with similar baseline characteristics (Table 1). The overall median age was 80 years (interquartile range 75 to 86 years).

**Table 1: Baseline characteristics for all patients (derivation and validation cohort) stratified by complexity, as number and percentage or median and inter-quartile range for categorical and continuous variables, respectively.**

|                                                                                  | Overall<br>(N=1889)                   | Non-<br>complex<br>(N=1326) | Complex<br>(N=563) |
|----------------------------------------------------------------------------------|---------------------------------------|-----------------------------|--------------------|
|                                                                                  | n (%) or median [interquartile range] |                             |                    |
| <b>Age</b>                                                                       |                                       |                             |                    |
| ≥ 80 years                                                                       | 579 (31)                              | 442 (33)                    | 137 (24)           |
| 70 to 79 years                                                                   | 437 (23)                              | 304 (23)                    | 133 (24)           |
| 60 to 69 years                                                                   | 322 (17)                              | 211 (16)                    | 111 (20)           |
| < 60 years                                                                       | 537 (28)                              | 363 (27)                    | 174 (31)           |
| <b>Female sex</b>                                                                | 873 (46)                              | 627 (47)                    | 246 (44)           |
| <b>Living area<sup>1</sup></b>                                                   |                                       |                             |                    |
| Urban                                                                            | 611 (32)                              | 453 (34)                    | 158 (28)           |
| Rural                                                                            | 1238 (65)                             | 848 (64)                    | 390 (69)           |
| <b>Marital status</b>                                                            |                                       |                             |                    |
| Single                                                                           | 331 (17)                              | 252 (19)                    | 79 (14)            |
| Couple                                                                           | 636 (34)                              | 429 (32)                    | 207 (37)           |
| Widowed                                                                          | 916 (48)                              | 641 (48)                    | 275 (49)           |
| <b>Hospitalization within last 12 months</b>                                     | 673 (36)                              | 452 (34)                    | 221 (39)           |
| <b>Medication<sup>2</sup></b>                                                    |                                       |                             |                    |
| Antineoplastic and immunomodulating agents at admission                          | 70 (4)                                | 38 (3)                      | 32 (6)             |
| Nervous system at admission                                                      | 1340 (71)                             | 918 (69)                    | 422 (75)           |
| Systemic hormonal preparations, excluding sex hormones and insulins at discharge | 524 (28)                              | 318 (24)                    | 206 (37)           |
| <b>High costs during hospitalization<sup>3</sup></b>                             |                                       |                             |                    |
| For imaging procedures                                                           | 485 (26)                              | 255 (19)                    | 230 (41)           |
| For laboratory analysis                                                          | 482 (25)                              | 203 (15)                    | 279 (50)           |

<sup>1</sup> Defined according to the Swiss Federal Statistical Office based on place of residence

<sup>2</sup> Group of drugs according to ATC classification

<sup>3</sup> Defined as costs of all imaging procedures or medication during hospital stay above 75<sup>th</sup> percentile

|                                                        |           |          |          |
|--------------------------------------------------------|-----------|----------|----------|
| <b>High nurse workload<sup>4</sup></b>                 | 475 (25)  | 203 (15) | 272 (48) |
| <b>Charlson Comorbidity Index</b>                      | 2 [0; 4]  | 2 [0; 3] | 3 [1; 5] |
| <b>Principal or concomitant diagnosis at discharge</b> |           |          |          |
| Cancer <sup>5</sup>                                    | 225 (12)  | 136 (10) | 89 (16)  |
| COPD <sup>6</sup>                                      | 186 (10)  | 124 (9)  | 62 (11)  |
| Dementia <sup>7</sup>                                  | 163 (9)   | 125 (9)  | 38 (7)   |
| Depression <sup>8</sup>                                | 209 (11)  | 140 (11) | 69 (12)  |
| Heart failure <sup>9</sup>                             | 327 (17)  | 206 (15) | 121 (21) |
| Pneumonia <sup>10</sup>                                | 244 (13)  | 159 (12) | 85 (15)  |
| Sepsis <sup>11</sup>                                   | 229 (12)  | 132 (10) | 97 (17)  |
| Stroke <sup>12</sup>                                   | 90 (5)    | 65 (5)   | 25 (4)   |
| Substance abuse <sup>13</sup>                          | 212 (11)  | 129 (10) | 83 (15)  |
| Syncope <sup>14</sup>                                  | 81 (4)    | 67 (5)   | 14 (2)   |
| Malnutrition <sup>15</sup>                             | 265 (14)  | 122 (9)  | 143 (25) |
| <b>Multimorbidity</b>                                  |           |          |          |
| Low (number of diagnoses ≤ 6)                          | 510 (27)  | 435 (33) | 75 (13)  |
| Middle (number of diagnoses > 6 and <14) <sup>16</sup> | 841 (44)  | 603 (45) | 238 (42) |
| High (number of diagnoses ≥ 14)                        | 524 (28)  | 282 (21) | 242 (43) |
| <b>PCCL</b>                                            | 3 [2; 4]  | 3 [1; 4] | 4 [3; 4] |
| No complication or comorbidity                         | 380 (20)  | 312 (23) | 68 (12)  |
| Light complication or comorbidity                      | 29 (1)    | 21 (2)   | 8 (1)    |
| Moderate complication or comorbidity                   | 292 (15)  | 233 (18) | 59 (10)  |
| Severe complication or comorbidity                     | 533 (28)  | 409 (31) | 124 (22) |
| Very severe complication or comorbidity                | 641 (34)  | 345 (26) | 296 (53) |
| <b>Abnormal creatinine level<sup>17</sup></b>          |           |          |          |
| At admission and discharge                             | 368 (19)  | 241 (18) | 127 (23) |
| At admission only                                      | 182 (10)  | 106 (8)  | 76 (13)  |
| At discharge only                                      | 63 (3)    | 34 (3)   | 29 (5)   |
| <b>Leukocytosis<sup>18</sup></b>                       |           |          |          |
| At admission and discharge                             | 77 (41)   | 47 (3)   | 30 (5)   |
| At admission only                                      | 19 (1)    | 8 (<1)   | 11 (2)   |
| At discharge only                                      | 13 (<1)   | 5 (<1)   | 8 (1)    |
| <b>Patient destination</b>                             |           |          |          |
| Death                                                  | 134 (7)   | 91 (7)   | 43 (8)   |
| Home                                                   | 1178 (62) | 873 (66) | 305 (54) |

<sup>4</sup> Defined as sum of hours of all nursing work (incl. sitting guard) during hospital stay above 75<sup>th</sup> percentile

<sup>5</sup> ICD10-codes B21, C00 through C97, Z03.1

<sup>6</sup> ICD10-codes J44

<sup>7</sup> ICD10-codes F00 through F03, F05.0, F05.1

<sup>8</sup> ICD10-codes F20.4, F25.1, F31.3 F31.4, F31.5, F32, F33, F41.2, F92.0

<sup>9</sup> ICD10-codes I50

<sup>10</sup> ICD10-codes A48.1, B01.2, B05.2, J10.0, J11.0, J12 through J18, J68.0, J69, J85.1, O74.0, U69.00

<sup>11</sup> ICD10-codes A02.1, A20.7, A22.7, A26.7, A32.7, A39.2, A39.3, A39.4, A40, A41, A42.7, B37.7

<sup>12</sup> ICD10-codes I63

<sup>13</sup> ICD10-codes F10 through F19, F53, F66.8, F66.9

<sup>14</sup> ICD10-codes R55

<sup>15</sup> ICD10-codes E40 through E46

<sup>16</sup> Between 25<sup>th</sup> and 75<sup>th</sup> percentile

<sup>17</sup> Defined as creatinine ≥100 µmol/l

<sup>18</sup> Defined as leukocyte count ≥20 G/l

|                    |          |         |         |
|--------------------|----------|---------|---------|
| Hospital           | 191 (10) | 119 (9) | 72 (13) |
| Nursing home       | 155 (8)  | 108 (8) | 47 (8)  |
| Rehabilitation     | 171 (9)  | 101 (8) | 70 (12) |
| Others and missing | 60 (3)   | 24 (3)  | 26 (5)  |

After backward selection, 11 of the 52 potential predictors were used to derive the PCA score **Error!**

**Reference source not found.**) Besides diagnosis-related factors, they represented demographic characteristic, hospital variables, medication and laboratory values. Highest score points were assigned to leucocytosis (at discharge only, 16 points, and at admission and discharge, 10 points) followed by age under 60 years, high nurse workload (costs above 75<sup>th</sup> percentile for nursing expenses), and abnormal serum creatinine at discharge ( $\geq 100 \mu\text{mol/l}$ ).

**Table 2: PCA score weighted according to coefficients**

| Variable                                               | Coefficient (95% CI) | Score points |
|--------------------------------------------------------|----------------------|--------------|
| <b>Age</b>                                             |                      |              |
| ≥ 80 years                                             | Reference            |              |
| 70 to 79 years                                         | 0.36 (0, 0.72)       | 3            |
| 60 to 69 years                                         | 0.5 (0.1, 0.9)       | 5            |
| < 60 years                                             | 0.94 (0.56, 1.31)    | 9            |
| <b>Elective admission</b>                              | 0.36 (0.03, 0.69)    | 3            |
| <b>High costs during hospitalization</b> <sup>19</sup> |                      |              |
| For imaging procedures                                 | 0.6 (0.31, 0.9)      | 6            |
| For laboratory analysis                                | 0.77 (0.46, 1.09)    | 7            |
| <b>High nurse workload</b> <sup>20</sup>               | 0.93 (0.61, 1.26)    | 9            |
| <b>Malnutrition</b> <sup>21</sup>                      | 0.47 (0.1, 0.84)     | 4            |
| <b>Multimorbidity</b>                                  |                      |              |
| Number of diagnoses ≤ 6                                | Reference            |              |
| Number of diagnoses > 6 and <14 <sup>22</sup>          | 0.61 (0.25, 0.96)    | 6            |
| Number of diagnoses ≥ 14 <sup>23</sup>                 | 0.78 (0.36, 1.2)     | 7            |
| <b>Medication at admission</b> <sup>24</sup>           |                      |              |
| Antineoplastic and immunomodulating agents             | 0.85 (0.16, 1.54)    | 8            |
| Nervous system                                         | 0.33 (0.04, 0.63)    | 3            |
| <b>Abnormal creatinine level</b> <sup>25</sup>         |                      |              |
| None                                                   | Reference            |              |

<sup>19</sup> Defined as costs of all imaging procedures or medication during hospital stay above 75<sup>th</sup> percentile

<sup>20</sup> Defined as sum of hours of all nursing work (incl. sitting guard) during hospital stay above 75<sup>th</sup> percentile

<sup>21</sup> ICD10-codes E40 through E46

<sup>22</sup> Between 25<sup>th</sup> and 75<sup>th</sup> percentile

<sup>23</sup> Above 75<sup>th</sup> percentile

<sup>24</sup> Group of drugs according to ATC classification

<sup>25</sup> Defined as serum creatinine  $\geq 100 \mu\text{mol/l}$

|                                  |                      |    |
|----------------------------------|----------------------|----|
| At admission only                | 0.23 (-0.22, 0.68)   | 2  |
| At admission and discharge       | 0.11 (-0.22, 0.45)   | 1  |
| At discharge only                | 0.96 (0.29, 1.63)    | 9  |
| <b>Leukocytosis<sup>26</sup></b> |                      |    |
| None                             | Reference            |    |
| At admission only                | 0.11 (-0.49, 0.71)   | 1  |
| At admission and discharge       | 1.12 (-0.04, 2.29)   | 10 |
| At discharge only                | 1.68 (0.18, 3.18)    | 16 |
| <b>Intercept</b>                 | -2.93 (-3.39, -2.46) | NA |

The prediction model showed a good accuracy, with a Brier score of 0.17 and 0.15 in internal and external validation, respectively. The calibration curve showed fair agreement between predicted and observed proportions of complexity in the derivation cohort and slightly lower observed proportions than predicted probabilities in the validation cohort (graphs not shown). The calibration-in-the-large coefficient of -0.51 (95% CI -0.74 to -0.27) in the validation cohort implies that the mean observed proportion was lower than the mean predicted probability. However, the calibration curve slope was satisfactory in internal and external validation (0.93 [95% CI 0.80 to 1.05] and 0.96 [95% CI 0.74 to 1.18]), respectively.

The median score was 17 points in the derivation and validation cohort (mean 18.77 and 19.03, respectively). The minimal score was 0 points in both cohorts, the maximal score reached was 54 points in the derivation cohort and 53 points in the validation cohort (theoretically maximal 81 score points). The score's area under the receiver operating characteristic (AUROC) curve was 0.77 (95% CI 0.74 to 0.79) and 0.78 (95% CI 0.74 to 0.82) in internal and external validation.

**Table 3: Stratification of Observed vs. predicted complex patients applying the PCA score.**

|                       | Score points | Risk category of complexity | Patients in each category | Complex patients | Estimated risk of complexity |
|-----------------------|--------------|-----------------------------|---------------------------|------------------|------------------------------|
| <b>Derivation set</b> | < 24         | Low risk                    | 991 (70%)                 | 193 (19%)        | 19                           |
|                       | ≥ 24         | High risk                   | 416 (30%)                 | 254 (61%)        | 61                           |
| <b>Validation set</b> | < 24         | Low risk                    | 347 (72%)                 | 50 (14%)         | 20                           |
|                       | ≥ 24         | High risk                   | 135 (28%)                 | 66 (49%)         | 62                           |

<sup>26</sup> Defined as blood leukocyte count ≥20 G/l

We classified patients as low and high complexity risk (table 3) according to the selected cut-off of 24 points. The proportion of patients categorized as complex (i.e. score  $\geq 24$  points) was 30% and 28% in the derivation and validation dataset, respectively. Sensitivity was 57% in both the derivation and validation dataset. The specificity was 83% and 81%, respectively. Positive predictive values were 61% and 49% in the derivation and validation cohort, respectively, while negative predictive values were 81% and 86%, respectively. The discriminatory power of the PCA score was robust with an AUROC of 0.77 (95% CI 0.74 to 0.79) in internal validation (bootstrap-corrected value) and 0.78 (95% CI 0.74 to 0.82) in external validation (table 4).

**Table 4: Measures of performance to predict complexity**

|                                      | PCA,<br>derivation set<br>% (95%-CI) | PCA,<br>validation set<br>% (95%-CI) | CCI, validation<br>set<br>% (95%-CI) | PCCL,<br>validation set<br>% (95%-CI) |
|--------------------------------------|--------------------------------------|--------------------------------------|--------------------------------------|---------------------------------------|
| <b>Sensitivity</b>                   | 57 (52-61)                           | 57 (47-66)                           | 41 (32-50)                           | 61 (51-70)                            |
| <b>Specificity</b>                   | 83 (81-85)                           | 81 (77-85)                           | 75 (71-80)                           | 75 (70-79)                            |
| <b>Positive<br/>predictive value</b> | 61 (59-66)                           | 49 (40-58)                           | 34 (26-43)                           | 42 (34-50)                            |
| <b>Negative<br/>predictive value</b> | 81 (78-83)                           | 86 (81-89)                           | 80 (75-84)                           | 86 (82-90)                            |
| <b>Misclassification<br/>error</b>   | 25 (28-23)                           | 25 (29-21)                           | 33 (37-29)                           | 28 (33-24)                            |
| <b>AUROC<sup>27</sup></b>            | 0.77 (0.74-0.79) <sup>28</sup>       | 0.78 (0.74-0.82)                     | 0.62 (0.56-0.68)                     | 0.69 (0.64-0.75)                      |

In comparison, predictive accuracy of the CCI was lower compared to the PCA score. The AUROCs were low with 0.58 (95% CI 0.55 to 0.62) and 0.62 (95% CI 0.56 to 0.68) in the derivation and validation cohort, respectively (table 4). Sensitivity of the CCI reached 36% (95% CI 31% to 40%) and 41% (95% CI 31% to 50%) in derivation and validation cohort, respectively, while specificity was 76% (95% CI 73% to 78%) and 75% (95% CI 71% to 80%), respectively. The decision curve analysis (supplementary figure) indicates a superiority of the PCA score compared to the CCI to predict complexity.

<sup>27</sup> Area under receiver operating characteristic

<sup>28</sup> Bootstrap-corrected from internal validation



1  
2  
3 AUROCs of PCCL were between those of CCI and PCA score with 0.64 (95% CI 0.61 to 0.67) and 0.69  
4 (95% CI 0.64 to 0.75) in the derivation and validation cohort, respectively (table 4). Sensitivity was 52%  
5 (95% CI 47% to 56%) and 61% (95% CI 51% to 70%), respectively, while specificity was 73% (95% CI  
6 71% to 76%) and 75% (95% CI 70% to 79%).  
7  
8  
9

## 10 11 **DISCUSSION**

12  
13 We derived and validated the PCA score that accurately assessed patient complexity in medical  
14 inpatients. The final score of eleven independent and readily available factors, included age, hospital  
15 variables, diagnosis related aspects and laboratory variables. The PCA score showed overall good  
16 performance with a discriminatory power of 0.78 that surpasses other comorbidity-based tools such as the  
17 Charlson comorbidity index and the PCCL.  
18  
19  
20  
21  
22

23 In this cohort of medical inpatients, 32% and 24% were considered “complex” by the treating physician, in  
24 the derivation and the validation cohort, respectively. This first estimate of patient complexity in the  
25 hospital setting is consistent with a previous assessment in an outpatient population where 26% of total  
26 4,302 patients were categorized as being complex by a primary care physician.[1] Based on these data,  
27 the authors later derived a model to identify around 20% of 143,372 primary care patients as complex.  
28  
29 Using the model and outpatient CCI or PCCL, only modest agreement between the methods was  
30 observed (37% and 40%, respectively).[2] Therefore, a tool not solely based on multimorbidity, such as  
31 the newly developed PCA score, seems to better identify complex patients.  
32  
33  
34  
35  
36  
37  
38

39 In the present study, age was an inverse predictor of complexity. In a previous study of outpatients, mean  
40 age of complex patients was 60 years versus 48 years in non-complex patients.[1] Nonetheless, the same  
41 study reported noteworthy age-related variability: in younger patients the association of certain diagnoses  
42 (e.g. alcohol-related diseases) with complexity was stronger, and deprivation as contributor to complexity  
43 is independent of age.[1,4] In our setting, discharge planning processes for older patients may be better  
44 established (e.g. including hospital social services, decision making based on patient’s provision and  
45 discharge to geriatric rehabilitation facilities or nursing homes) compared to younger patients.[1,8,25,26]  
46  
47 Elective admissions to a tertiary hospital may represent a cohort of rather complex patients preselected by  
48 primary care physicians and smaller hospitals (21% elective admissions in complex patients versus 14%  
49 in non-complex patients). It is also possible that these patients are only perceived as more complex by the  
50  
51  
52  
53  
54  
55  
56  
57  
58  
59  
60

1  
2  
3 treating physician because patients admitted directly to the medical ward are pending initial work-up  
4 otherwise provided in the emergency department.  
5  
6

7 Patients with high costs of imaging procedures may reflect the patients with more severe diseases or  
8 more diagnosis uncertainty. Similarly, high costs for laboratory analysis may be explained by a higher  
9 need of costly or repeated measurements in more complex patients. High costs for care/nursing were  
10 predictors of complexity highlighting some concordance between the nurse workload and the medical  
11 complexity.  
12  
13  
14  
15

16  
17 In our study multimorbidity is defined as a number of more than 6 diagnoses was a predictor of  
18 complexity. Comorbidity-based scores, i.e., the CCI, are commonly used to identify complex patients.  
19 Indeed, in the study of Grant et al. the proportion of multimorbid patients identified by a CCI of 2 or more  
20 was higher in complex patients, i.e., 26% of complex patients were multimorbid versus 9% of non-complex  
21 patients.[1] However, many multimorbid patients are not complex and not all complex patients are  
22 multimorbid. In our cohort (derivation and validation datasets together) 34% of polymorbid patients (CCI  
23  $\geq 2$ ) were complex versus 24% in the group of CCI  $< 2$ . Comparably, nearly one half of patients with a CCI  
24 of 2 or greater were classified as non-complex in the study of Grant et al.[1] Therefore, a system to identify  
25 complexity should not depend on diagnosis alone.  
26  
27  
28  
29  
30  
31  
32  
33  
34

35 In the PCA score, malnutrition was a risk factor of complexity. Malnutrition in hospitalized patients is  
36 associated with more complications, increased mortality, longer hospital stays and higher costs [27,28].  
37 Therefore, malnutrition and complexity may both reflect a cluster of severe and chronic disease as well as  
38 socioeconomic circumstances.[1]  
39  
40  
41  
42  
43

44 Antineoplastic and immunomodulating medication at admission was a predictor of complexity. These  
45 drugs are used for oncologic patients, but also in patients with rheumatologic disease or after receiving  
46 organ transplants. These patients may be complex because of challenging infectious diseases, end-of-life  
47 issues and interdisciplinary care. Abnormal values of serum creatinine and leukocyte counts at discharge  
48 were predictive of complexity whether the values were normal or abnormal at admission. These patients  
49 may also requiring more interaction between specialists and may complicate the discharge process.  
50  
51  
52  
53  
54  
55  
56  
57  
58  
59  
60

1  
2  
3 Personal characteristics or mental health issues and use of psychoactive medication, i.e., narcotics,  
4 selective serotonin reuptake inhibitors, benzodiazepines, smoking cessation agents and antipsychotics,  
5 have been described as characterizing complex patients, especially in younger patients.[1] This is in line  
6 with the observation that in the PCA score, use of medication affecting the nervous system at admission  
7 (including antipsychotics, mood-stabilizers, sedatives, analgesics including opioids, anticonvulsive  
8 medication and anti-dementia drugs) was a predictor of complexity. These patients may challenge the  
9 known pathways of the healthcare system, e.g. by parallel use of general internal medicine and psychiatric  
10 resources.  
11  
12  
13  
14  
15  
16  
17  
18

19 There are several limitations of the study. First, we used physician's assessment to define complexity,  
20 which per definition is subjective. Nonetheless, there is no better standard reference (gold standard) and  
21 the proportion of patients identified as complex was similar in previous studies.[1,2] Second, the PCA  
22 score has been developed at a single tertiary hospital and therefore may not be generalizable to other  
23 settings. Third, it is likely that our model does not consider every important predictor, but it allows deriving  
24 an easily usable tool which kept its fair sensitivity and good specificity in our external validation. Fourth,  
25 the PCA score includes values available only at discharge, which makes patient-aimed interventions  
26 during hospitalization difficult. This is however also true for alternative assessment tools, such as the CCI  
27 and the PCCL, which had a lower performance in identifying complex patients in our cohort. Fifth, the  
28 included predictors are not modifiable. For example, a patient will still be complex if receiving less imaging  
29 procedures to reduce costs.  
30  
31  
32  
33  
34  
35  
36  
37  
38  
39

40 To our knowledge, the PCA score is the first tool to identify complex medical patients in the hospital  
41 setting. It can easily be calculated and is therefore predestined to be used for population-based studies as  
42 it does not involve individual judgement of a physician. With its prospective design and inclusion of a large  
43 number of medical inpatients, this study has a strong design.  
44  
45  
46  
47  
48

49 Identification of complex patients by this simple tool using electronically available data may help  
50 monitoring the proportion of complex patients in the hospital setting and comparing patient complexity  
51 level between hospitals. Thereby, the PCA score might improve the monitoring of resources distribution  
52 and coordination of care.  
53  
54  
55  
56  
57  
58  
59  
60

1  
2  
3  
4  
5  
6  
7  
8  
9  
10  
11  
12  
13  
14  
15  
16  
17  
18  
19  
20  
21  
22  
23  
24  
25  
26  
27  
28  
29  
30  
31  
32  
33  
34  
35  
36  
37  
38  
39  
40  
41  
42  
43  
44  
45  
46  
47  
48  
49  
50  
51  
52  
53  
54  
55  
56  
57  
58  
59  
60

For peer review only

## ACKNOWLEDGEMENTS

We acknowledge the support by Roland Angerer (coding data) and Barbara Ammann (workload nurse).

## REFERENCES

1. Grant RW, Ashburner JM, Hong CS, et al. Defining patient complexity from the primary care physician's perspective: a cohort study. *Annals of internal medicine* 2011;**155**(12):797-804.
2. Hong CS, Atlas SJ, Ashburner JM, et al. Evaluating a Model to Predict Primary Care Physician-Defined Complexity in a Large Academic Primary Care Practice-Based Research Network. *Journal of general internal medicine* 2015;**30**(12):1741-7.
3. Katerndahl D. Providing complex (rather than complicated) chronic care. *Journal of the American Board of Family Medicine : JABFM* 2014;**27**(1):6-7.
4. Mercer SW, Guthrie B, Furler J, et al. Multimorbidity and the inverse care law in primary care. *Bmj* 2012;**344**:e4152.
5. Peek CJ, Baird MA, Coleman E. Primary care for patient complexity, not only disease. *Families, systems & health : the journal of collaborative family healthcare* 2009;**27**(4):287-302.
6. Safford MM, Allison JJ, Kiefe CI. Patient complexity: more than comorbidity. the vector model of complexity. *Journal of general internal medicine* 2007;**22 Suppl 3**:382-90.
7. Gupta S, Perry JA, Kozar R. *Transitions of Care in Geriatric Medicine*. Clinics in geriatric medicine 2019;**35**(1):45-52.
8. Kutz A, Ebrahimi F, Struja T, et al. Innovative transition interventions to better align healthcare needs in hospitalised medical patients. *Swiss medical weekly* 2017;**147**:w14515.
9. Schaink AK, Kuluski K, Lyons RF, et al. A scoping review and thematic classification of patient complexity: offering a unifying framework. *Journal of comorbidity* 2012;**2**:1-9.
10. Sturmberg JP, Martin CM, Katerndahl DA. Systems and complexity thinking in the general practice literature: an integrative, historical narrative review. *Annals of family medicine* 2014;**12**(1):66-74.
11. Sturmberg JP, Martin CM, Katerndahl DA. It is complicated! - misunderstanding the complexities of 'complex'. *Journal of evaluation in clinical practice* 2017;**23**(2):426-29.
12. Weiss KB. Managing complexity in chronic care: an overview of the VA state-of-the-art (SOTA) conference. *Journal of general internal medicine* 2007;**22 Suppl 3**:374-8.

13. Charlson ME, Pompei P, Ales KL, et al. A new method of classifying prognostic comorbidity in longitudinal studies: development and validation. *Journal of chronic diseases* 1987;**40**(5):373-83.
14. Mehra T, Muller CT, Volbracht J, et al. Predictors of High Profit and High Deficit Outliers under SwissDRG of a Tertiary Care Center. *PloS one* 2015;**10**(10):e0140874.
15. Harrell FE, Jr., Lee KL, Mark DB. Multivariable prognostic models: issues in developing models, evaluating assumptions and adequacy, and measuring and reducing errors. *Statistics in medicine* 1996;**15**(4):361-87.
16. Peduzzi P, Concato J, Kemper E, et al. A simulation study of the number of events per variable in logistic regression analysis. *Journal of clinical epidemiology* 1996;**49**(12):1373-9.
17. Collins GS, Reitsma JB, Altman DG, et al. Transparent Reporting of a multivariable prediction model for Individual Prognosis Or Diagnosis (TRIPOD). *Annals of internal medicine* 2015;**162**(10):735-6.
18. Barker AL, Morello RT, Wolfe R, et al. 6-PACK programme to decrease fall injuries in acute hospitals: cluster randomised controlled trial. *Bmj* 2016;**352**:h6781.
19. SwissDRG. Swiss Diagnosis Related Groups Version 5.0, Abrechnunsversion (2016/2016), 2015.
20. SwissDRG. Swiss Diagnosis Related Groups Version 6.0, Abrechnunsversion (2017/2017), 2016.
21. Crelier B, Streit S, Donzé JD. Patient Complexity Characteristics in the Hospital Setting. *The American Journal of Accountable Care* 2018;**9**(3):3-8.
22. Moons KG, Harrell FE, Steyerberg EW. Should scoring rules be based on odds ratios or regression coefficients? *Journal of clinical epidemiology* 2002;**55**(10):1054-5.
23. Steyerberg EW, Harrell FE, Jr., Borsboom GJ, et al. Internal validation of predictive models: efficiency of some procedures for logistic regression analysis. *Journal of clinical epidemiology* 2001;**54**(8):774-81.
24. Rousson V, Zumbunn T. Decision curve analysis revisited: overall net benefit, relationships to ROC curve analysis, and application to case-control studies. *BMC medical informatics and decision making* 2011;**11**:45.
25. Biller-Andorno N, Zeltner T. Individual Responsibility and Community Solidarity--The Swiss Health Care System. *The New England journal of medicine* 2015;**373**(23):2193-7.
26. Mabire C, Bula C, Morin D, et al. Nursing discharge planning for older medical inpatients in Switzerland: A cross-sectional study. *Geriatric nursing* 2015;**36**(6):451-7.

1  
2  
3 27. Correia MI, Waitzberg DL. The impact of malnutrition on morbidity, mortality, length of hospital stay  
4 and costs evaluated through a multivariate model analysis. *Clinical nutrition* 2003;**22**(3):235-9.

5  
6  
7 28. Norman K, Pichard C, Lochs H, et al. Prognostic impact of disease-related malnutrition. *Clinical*  
8  
9 *nutrition* 2008;**27**(1):5-15.

10  
11  
12  
13  
14 **FIGURE 1 CAPTION**

15  
16 Flow chart. Derivation sample (derivation and internal validation cohort) and external validation sample  
17 (temporal validation cohort).  
18  
19  
20  
21  
22  
23  
24  
25  
26  
27  
28  
29  
30  
31  
32  
33  
34  
35  
36  
37  
38  
39  
40  
41  
42  
43  
44  
45  
46  
47  
48  
49  
50  
51  
52  
53  
54  
55  
56  
57  
58  
59  
60

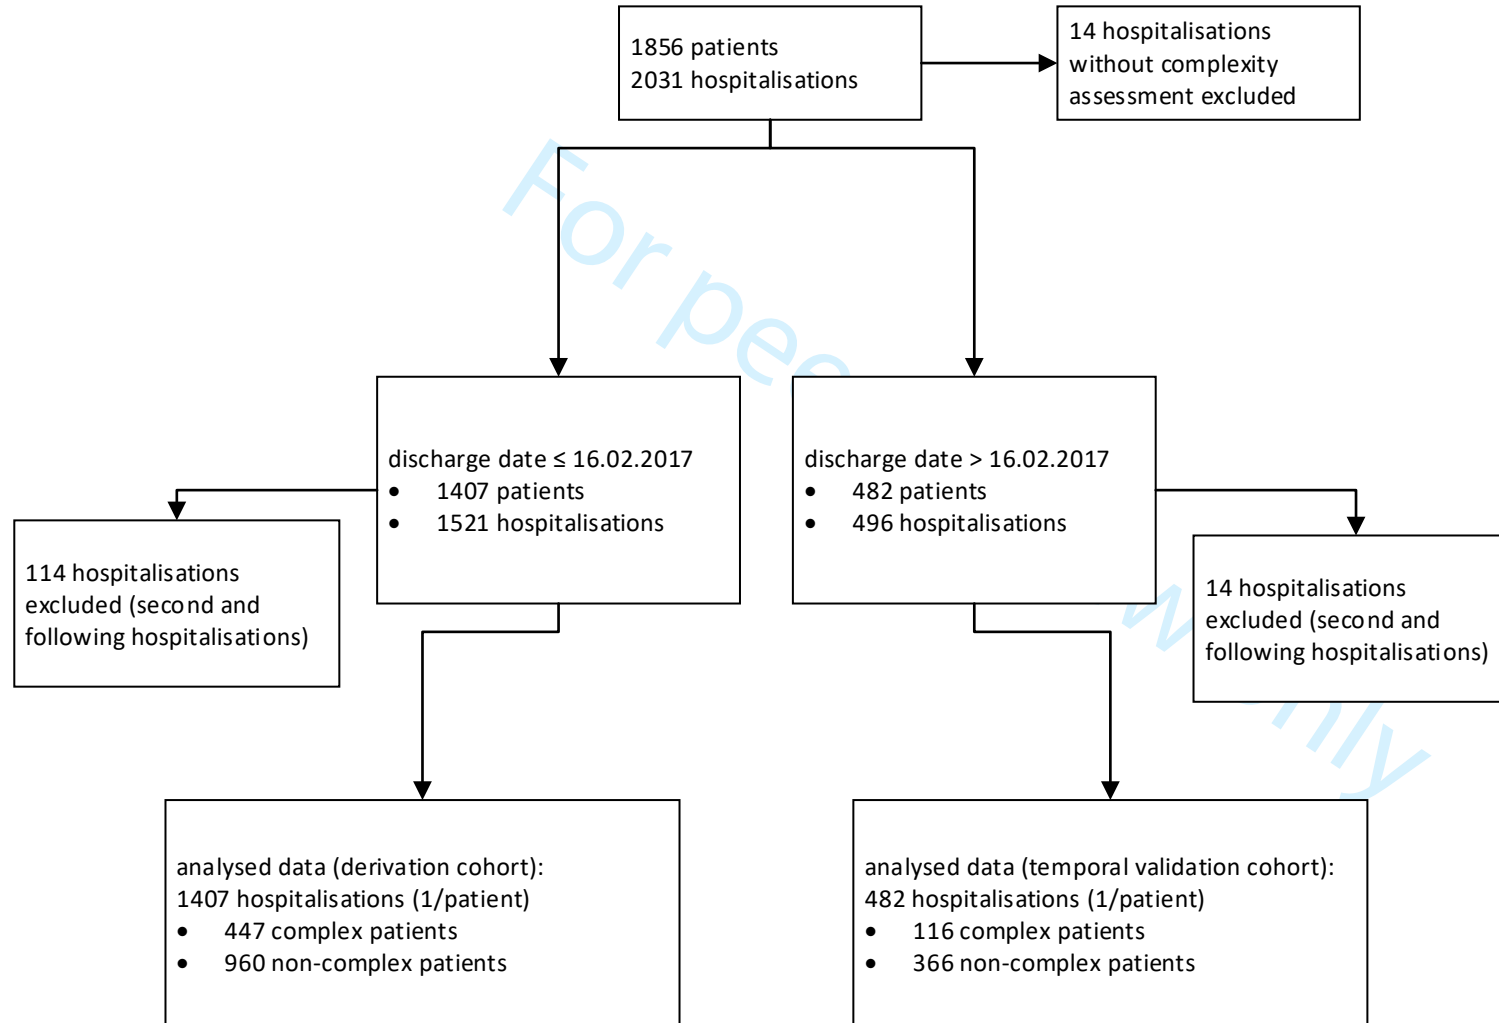

1  
2  
3  
4  
5  
6  
7  
8  
9  
10  
11  
12  
13  
14  
15  
16  
17  
18  
19  
20  
21  
22  
23  
24  
25  
26  
27  
28  
29  
30  
31  
32  
33  
34  
35  
36  
37  
38  
39  
40  
41  
42  
43  
44  
45  
46



## Supplementary figure: Decision curve analysis

Grey line: assume all patients are “treated” for complexity. Thin black line: assume none of the patient is “treated” for complexity (“treat none”). Blue line: prediction model based on the Charlson comorbidity index. Red line: prediction model based on the PCA score.

### A) Derivation dataset

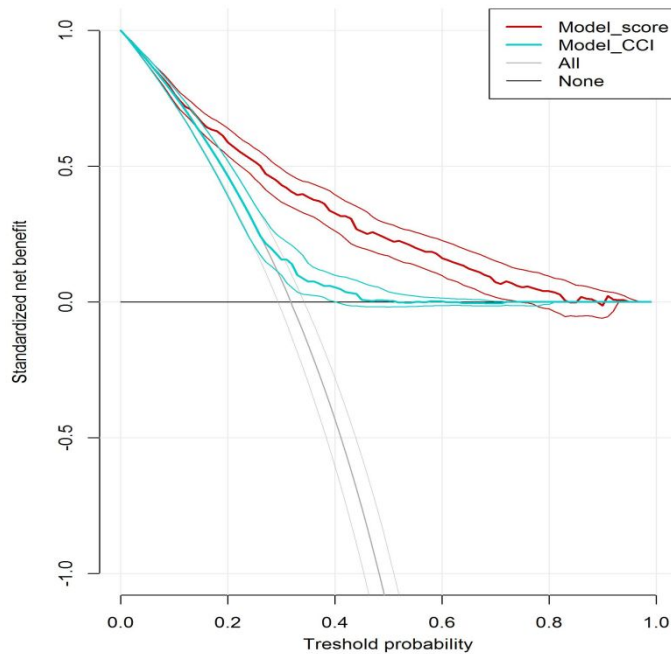

B) Validation dataset

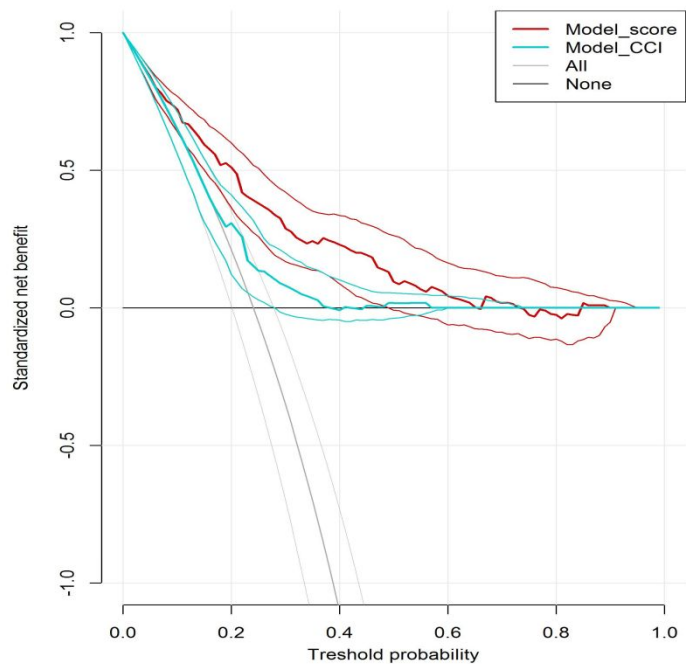

Review only

# Reporting checklist for prediction model development and validation study.

Based on the TRIPOD guidelines.

## Instructions to authors

Complete this checklist by entering the page numbers from your manuscript where readers will find each of the items listed below.

Your article may not currently address all the items on the checklist. Please modify your text to include the missing information. If you are certain that an item does not apply, please write "n/a" and provide a short explanation.

Upload your completed checklist as an extra file when you submit to a journal.

In your methods section, say that you used the TRIPOD reporting guidelines, and cite them as:

Collins GS, Reitsma JB, Altman DG, Moons KG. Transparent reporting of a multivariable prediction model for individual prognosis or diagnosis (TRIPOD): The TRIPOD statement.

|              | Reporting Item                                                                                                                                                    | Page Number |
|--------------|-------------------------------------------------------------------------------------------------------------------------------------------------------------------|-------------|
| <b>Title</b> |                                                                                                                                                                   |             |
|              | <a href="#">#1</a> Identify the study as developing and / or validating a multivariable prediction model, the target population, and the outcome to be predicted. | 1           |

## Abstract

|    |                     |                                                                 |     |
|----|---------------------|-----------------------------------------------------------------|-----|
| 1  |                     |                                                                 |     |
| 2  |                     | <a href="#">#2</a>                                              | 3   |
| 3  |                     | Provide a summary of objectives, study design, setting,         |     |
| 4  |                     | participants, sample size, predictors, outcome, statistical     |     |
| 5  |                     | analysis, results, and conclusions.                             |     |
| 6  |                     |                                                                 |     |
| 7  |                     |                                                                 |     |
| 8  |                     |                                                                 |     |
| 9  | <b>Introduction</b> |                                                                 |     |
| 10 |                     |                                                                 |     |
| 11 |                     |                                                                 |     |
| 12 |                     | <a href="#">#3a</a>                                             | 5   |
| 13 |                     | Explain the medical context (including whether diagnostic or    |     |
| 14 |                     | prognostic) and rationale for developing or validating the      |     |
| 15 |                     | multivariable prediction model, including references to         |     |
| 16 |                     | existing models.                                                |     |
| 17 |                     |                                                                 |     |
| 18 |                     |                                                                 |     |
| 19 |                     |                                                                 |     |
| 20 |                     |                                                                 |     |
| 21 |                     |                                                                 |     |
| 22 |                     | <a href="#">#3b</a>                                             | 5   |
| 23 |                     | Specify the objectives, including whether the study describes   |     |
| 24 |                     | the development or validation of the model or both.             |     |
| 25 |                     |                                                                 |     |
| 26 |                     |                                                                 |     |
| 27 | <b>Methods</b>      |                                                                 |     |
| 28 |                     |                                                                 |     |
| 29 |                     |                                                                 |     |
| 30 | Source of data      | <a href="#">#4a</a>                                             | 6   |
| 31 |                     | Describe the study design or source of data (e.g.,              |     |
| 32 |                     | randomized trial, cohort, or registry data), separately for the |     |
| 33 |                     | development and validation data sets, if applicable.            |     |
| 34 |                     |                                                                 |     |
| 35 |                     |                                                                 |     |
| 36 |                     |                                                                 |     |
| 37 |                     |                                                                 |     |
| 38 | Source of data      | <a href="#">#4b</a>                                             | 6   |
| 39 |                     | Specify the key study dates, including start of accrual; end of |     |
| 40 |                     | accrual; and, if applicable, end of follow-up.                  |     |
| 41 |                     |                                                                 |     |
| 42 |                     |                                                                 |     |
| 43 | Participants        | <a href="#">#5a</a>                                             | 6   |
| 44 |                     | Specify key elements of the study setting (e.g., primary care,  |     |
| 45 |                     | secondary care, general population) including number and        |     |
| 46 |                     | location of centres.                                            |     |
| 47 |                     |                                                                 |     |
| 48 |                     |                                                                 |     |
| 49 |                     |                                                                 |     |
| 50 |                     |                                                                 |     |
| 51 | Participants        | <a href="#">#5b</a>                                             | 6   |
| 52 |                     | Describe eligibility criteria for participants.                 |     |
| 53 |                     |                                                                 |     |
| 54 | Participants        | <a href="#">#5c</a>                                             | n/a |
| 55 |                     | Give details of treatments received, if relevant                |     |
| 56 |                     |                                                                 |     |
| 57 |                     |                                                                 |     |
| 58 |                     |                                                                 |     |
| 59 |                     |                                                                 |     |
| 60 |                     |                                                                 |     |

|    |                  |                      |                                                                                                                                                                         |     |
|----|------------------|----------------------|-------------------------------------------------------------------------------------------------------------------------------------------------------------------------|-----|
| 1  | Outcome          | <a href="#">#6a</a>  | Clearly define the outcome that is predicted by the prediction model, including how and when assessed.                                                                  | 6   |
| 2  |                  |                      |                                                                                                                                                                         |     |
| 3  |                  |                      |                                                                                                                                                                         |     |
| 4  |                  |                      |                                                                                                                                                                         |     |
| 5  |                  |                      |                                                                                                                                                                         |     |
| 6  | Outcome          | <a href="#">#6b</a>  | Report any actions to blind assessment of the outcome to be predicted.                                                                                                  | n/a |
| 7  |                  |                      |                                                                                                                                                                         |     |
| 8  |                  |                      |                                                                                                                                                                         |     |
| 9  |                  |                      |                                                                                                                                                                         |     |
| 10 |                  |                      |                                                                                                                                                                         |     |
| 11 | Predictors       | <a href="#">#7a</a>  | Clearly define all predictors used in developing or validating the multivariable prediction model, including how and when they were measured                            | 7   |
| 12 |                  |                      |                                                                                                                                                                         |     |
| 13 |                  |                      |                                                                                                                                                                         |     |
| 14 |                  |                      |                                                                                                                                                                         |     |
| 15 |                  |                      |                                                                                                                                                                         |     |
| 16 |                  |                      |                                                                                                                                                                         |     |
| 17 |                  |                      |                                                                                                                                                                         |     |
| 18 |                  |                      |                                                                                                                                                                         |     |
| 19 | Predictors       | <a href="#">#7b</a>  | Report any actions to blind assessment of predictors for the outcome and other predictors.                                                                              | n/a |
| 20 |                  |                      |                                                                                                                                                                         |     |
| 21 |                  |                      |                                                                                                                                                                         |     |
| 22 |                  |                      |                                                                                                                                                                         |     |
| 23 |                  |                      |                                                                                                                                                                         |     |
| 24 |                  |                      |                                                                                                                                                                         |     |
| 25 | Sample size      | <a href="#">#8</a>   | Explain how the study size was arrived at.                                                                                                                              | 6   |
| 26 |                  |                      |                                                                                                                                                                         |     |
| 27 |                  |                      |                                                                                                                                                                         |     |
| 28 | Missing data     | <a href="#">#9</a>   | Describe how missing data were handled (e.g., complete-case analysis, single imputation, multiple imputation) with details of any imputation method.                    | 8-9 |
| 29 |                  |                      |                                                                                                                                                                         |     |
| 30 |                  |                      |                                                                                                                                                                         |     |
| 31 |                  |                      |                                                                                                                                                                         |     |
| 32 |                  |                      |                                                                                                                                                                         |     |
| 33 |                  |                      |                                                                                                                                                                         |     |
| 34 |                  |                      |                                                                                                                                                                         |     |
| 35 | Statistical      | <a href="#">#10a</a> | If you are developing a prediction model describe how predictors were handled in the analyses.                                                                          | 8-9 |
| 36 | analysis methods |                      |                                                                                                                                                                         |     |
| 37 |                  |                      |                                                                                                                                                                         |     |
| 38 |                  |                      |                                                                                                                                                                         |     |
| 39 |                  |                      |                                                                                                                                                                         |     |
| 40 |                  |                      |                                                                                                                                                                         |     |
| 41 | Statistical      | <a href="#">#10b</a> | If you are developing a prediction model, specify type of model, all model-building procedures (including any predictor selection), and method for internal validation. | 8-9 |
| 42 | analysis methods |                      |                                                                                                                                                                         |     |
| 43 |                  |                      |                                                                                                                                                                         |     |
| 44 |                  |                      |                                                                                                                                                                         |     |
| 45 |                  |                      |                                                                                                                                                                         |     |
| 46 |                  |                      |                                                                                                                                                                         |     |
| 47 |                  |                      |                                                                                                                                                                         |     |
| 48 | Statistical      | <a href="#">#10c</a> | If you are validating a prediction model, describe how the predictions were calculated.                                                                                 | 8-9 |
| 49 | analysis methods |                      |                                                                                                                                                                         |     |
| 50 |                  |                      |                                                                                                                                                                         |     |
| 51 |                  |                      |                                                                                                                                                                         |     |
| 52 |                  |                      |                                                                                                                                                                         |     |
| 53 |                  |                      |                                                                                                                                                                         |     |
| 54 | Statistical      | <a href="#">#10d</a> | Specify all measures used to assess model performance and, if relevant, to compare multiple models.                                                                     | 8-9 |
| 55 | analysis methods |                      |                                                                                                                                                                         |     |
| 56 |                  |                      |                                                                                                                                                                         |     |
| 57 |                  |                      |                                                                                                                                                                         |     |
| 58 |                  |                      |                                                                                                                                                                         |     |
| 59 |                  |                      |                                                                                                                                                                         |     |
| 60 |                  |                      |                                                                                                                                                                         |     |

|    |                  |                      |                                                                 |        |
|----|------------------|----------------------|-----------------------------------------------------------------|--------|
| 1  | Statistical      | <a href="#">#10e</a> | If you are validating a prediction model, describe any model    | 8-9    |
| 2  |                  |                      |                                                                 |        |
| 3  | analysis methods |                      | updating (e.g., recalibration) arising from the validation, if  |        |
| 4  |                  |                      | done                                                            |        |
| 5  |                  |                      |                                                                 |        |
| 6  |                  |                      |                                                                 |        |
| 7  |                  |                      |                                                                 |        |
| 8  |                  |                      |                                                                 |        |
| 9  | Risk groups      | <a href="#">#11</a>  | Provide details on how risk groups were created, if done.       | n/a    |
| 10 |                  |                      |                                                                 |        |
| 11 |                  |                      |                                                                 |        |
| 12 | Development vs.  | <a href="#">#12</a>  | For validation, identify any differences from the development   | 8-9    |
| 13 | validation       |                      | data in setting, eligibility criteria, outcome, and predictors. |        |
| 14 |                  |                      |                                                                 |        |
| 15 |                  |                      |                                                                 |        |
| 16 |                  |                      |                                                                 |        |
| 17 | <b>Results</b>   |                      |                                                                 |        |
| 18 |                  |                      |                                                                 |        |
| 19 |                  |                      |                                                                 |        |
| 20 | Participants     | <a href="#">#13a</a> | Describe the flow of participants through the study, including  | 9 + 24 |
| 21 |                  |                      | the number of participants with and without the outcome         |        |
| 22 |                  |                      | and, if applicable, a summary of the follow-up time. A          |        |
| 23 |                  |                      | diagram may be helpful.                                         |        |
| 24 |                  |                      |                                                                 |        |
| 25 |                  |                      |                                                                 |        |
| 26 |                  |                      |                                                                 |        |
| 27 |                  |                      |                                                                 |        |
| 28 |                  |                      |                                                                 |        |
| 29 |                  |                      |                                                                 |        |
| 30 | Participants     | <a href="#">#13b</a> | Describe the characteristics of the participants (basic         | 9 + 18 |
| 31 |                  |                      | demographics, clinical features, available predictors),         |        |
| 32 |                  |                      | including the number of participants with missing data for      |        |
| 33 |                  |                      | predictors and outcome.                                         |        |
| 34 |                  |                      |                                                                 |        |
| 35 |                  |                      |                                                                 |        |
| 36 |                  |                      |                                                                 |        |
| 37 |                  |                      |                                                                 |        |
| 38 |                  |                      |                                                                 |        |
| 39 |                  |                      |                                                                 |        |
| 40 | Participants     | <a href="#">#13c</a> | For validation, show a comparison with the development          | 9 + 18 |
| 41 |                  |                      | data of the distribution of important variables (demographics,  |        |
| 42 |                  |                      | predictors and outcome).                                        |        |
| 43 |                  |                      |                                                                 |        |
| 44 |                  |                      |                                                                 |        |
| 45 |                  |                      |                                                                 |        |
| 46 |                  |                      |                                                                 |        |
| 47 |                  |                      |                                                                 |        |
| 48 | Model            | <a href="#">#14a</a> | If developing a model, specify the number of participants       | 9      |
| 49 |                  |                      | and outcome events in each analysis.                            |        |
| 50 | development      |                      |                                                                 |        |
| 51 |                  |                      |                                                                 |        |
| 52 |                  |                      |                                                                 |        |
| 53 | Model            | <a href="#">#14b</a> | If developing a model, report the unadjusted association, if    | 9      |
| 54 |                  |                      | calculated between each candidate predictor and outcome.        |        |
| 55 | development      |                      |                                                                 |        |
| 56 |                  |                      |                                                                 |        |
| 57 |                  |                      |                                                                 |        |
| 58 |                  |                      |                                                                 |        |
| 59 |                  |                      |                                                                 |        |
| 60 |                  |                      |                                                                 |        |

|    |                   |                      |                                                                  |         |
|----|-------------------|----------------------|------------------------------------------------------------------|---------|
| 1  | Model             | <a href="#">#15a</a> | If developing a model, present the full prediction model to      | 9 + 21  |
| 2  |                   |                      |                                                                  |         |
| 3  | specification     |                      | allow predictions for individuals (i.e., all regression          |         |
| 4  |                   |                      | coefficients, and model intercept or baseline survival at a      |         |
| 5  |                   |                      | given time point).                                               |         |
| 6  |                   |                      |                                                                  |         |
| 7  |                   |                      |                                                                  |         |
| 8  |                   |                      |                                                                  |         |
| 9  |                   |                      |                                                                  |         |
| 10 |                   |                      |                                                                  |         |
| 11 | Model             | <a href="#">#15b</a> | If developing a prediction model, explain how to the use it.     | 10 + 21 |
| 12 |                   |                      |                                                                  |         |
| 13 | specification     |                      |                                                                  |         |
| 14 |                   |                      |                                                                  |         |
| 15 |                   |                      |                                                                  |         |
| 16 | Model             | <a href="#">#16</a>  | Report performance measures (with CIs) for the prediction        | 10, 11, |
| 17 |                   |                      | model.                                                           | 23      |
| 18 | performance       |                      |                                                                  |         |
| 19 |                   |                      |                                                                  |         |
| 20 |                   |                      |                                                                  |         |
| 21 |                   |                      |                                                                  |         |
| 22 | Model-updating    | <a href="#">#17</a>  | If validating a model, report the results from any model         | 10-11   |
| 23 |                   |                      | updating, if done (i.e., model specification, model              |         |
| 24 |                   |                      | performance).                                                    |         |
| 25 |                   |                      |                                                                  |         |
| 26 |                   |                      |                                                                  |         |
| 27 |                   |                      |                                                                  |         |
| 28 |                   |                      |                                                                  |         |
| 29 | <b>Discussion</b> |                      |                                                                  |         |
| 30 |                   |                      |                                                                  |         |
| 31 |                   |                      |                                                                  |         |
| 32 | Limitations       | <a href="#">#18</a>  | Discuss any limitations of the study (such as                    | 14      |
| 33 |                   |                      | nonrepresentative sample, few events per predictor, missing      |         |
| 34 |                   |                      | data).                                                           |         |
| 35 |                   |                      |                                                                  |         |
| 36 |                   |                      |                                                                  |         |
| 37 |                   |                      |                                                                  |         |
| 38 |                   |                      |                                                                  |         |
| 39 |                   |                      |                                                                  |         |
| 40 | Interpretation    | <a href="#">#19a</a> | For validation, discuss the results with reference to            | 11-14   |
| 41 |                   |                      | performance in the development data, and any other               |         |
| 42 |                   |                      | validation data                                                  |         |
| 43 |                   |                      |                                                                  |         |
| 44 |                   |                      |                                                                  |         |
| 45 |                   |                      |                                                                  |         |
| 46 |                   |                      |                                                                  |         |
| 47 | Interpretation    | <a href="#">#19b</a> | Give an overall interpretation of the results, considering       | 11-14   |
| 48 |                   |                      | objectives, limitations, results from similar studies, and other |         |
| 49 |                   |                      | relevant evidence.                                               |         |
| 50 |                   |                      |                                                                  |         |
| 51 |                   |                      |                                                                  |         |
| 52 |                   |                      |                                                                  |         |
| 53 |                   |                      |                                                                  |         |
| 54 |                   |                      |                                                                  |         |
| 55 | Implications      | <a href="#">#20</a>  | Discuss the potential clinical use of the model and              | 14      |
| 56 |                   |                      | implications for future research                                 |         |
| 57 |                   |                      |                                                                  |         |
| 58 |                   |                      |                                                                  |         |
| 59 |                   |                      |                                                                  |         |
| 60 |                   |                      |                                                                  |         |

## Other information

|                           |                     |                                                                                                                               |    |
|---------------------------|---------------------|-------------------------------------------------------------------------------------------------------------------------------|----|
| Supplementary information | <a href="#">#21</a> | Provide information about the availability of supplementary resources, such as study protocol, Web calculator, and data sets. | 25 |
| Funding                   | <a href="#">#22</a> | Give the source of funding and the role of the funders for the present study.                                                 | 2  |

The TRIPOD checklist is distributed under the terms of the Creative Commons Attribution License CC-BY. This checklist was completed on 30. May 2020 using <https://www.goodreports.org/>, a tool made by the [EQUATOR Network](#) in collaboration with [Penelope.ai](#)



# BMJ Open

## Development and validation of a score to assess complexity of general internal medicine patients at hospital discharge: a prospective cohort study

|                                 |                                                                                                                                                                                                                                                                                                                                                                                                                                                                                                                                                                                                                       |
|---------------------------------|-----------------------------------------------------------------------------------------------------------------------------------------------------------------------------------------------------------------------------------------------------------------------------------------------------------------------------------------------------------------------------------------------------------------------------------------------------------------------------------------------------------------------------------------------------------------------------------------------------------------------|
| Journal:                        | <i>BMJ Open</i>                                                                                                                                                                                                                                                                                                                                                                                                                                                                                                                                                                                                       |
| Manuscript ID                   | bmjopen-2020-041205.R1                                                                                                                                                                                                                                                                                                                                                                                                                                                                                                                                                                                                |
| Article Type:                   | Original research                                                                                                                                                                                                                                                                                                                                                                                                                                                                                                                                                                                                     |
| Date Submitted by the Author:   | 16-Dec-2020                                                                                                                                                                                                                                                                                                                                                                                                                                                                                                                                                                                                           |
| Complete List of Authors:       | Liechti, Fabian; Inselspital University Hospital Bern, Department of General Internal Medicine<br>Beck, Thomas; Inselspital University Hospital Bern, Department of General Internal Medicine<br>Ruetsche, Adrian; Direction of Technology and Innovation, University Hospital Bern, Switzerland<br>Roumet, Marie; University of Bern, CTU Bern<br>Limacher, Andreas; University of Bern, CTU Bern<br>Tritschler, Tobias ; Inselspital University Hospital Bern,<br>Donzé, Jacques; Inselspital University Hospital Bern, Department of General Internal Medicine; Neuchâtel Hospital Network, Department of medicine |
| <b>Primary Subject Heading</b>: | Health services research                                                                                                                                                                                                                                                                                                                                                                                                                                                                                                                                                                                              |
| Secondary Subject Heading:      | Patient-centred medicine, Health services research                                                                                                                                                                                                                                                                                                                                                                                                                                                                                                                                                                    |
| Keywords:                       | PRIMARY CARE, GENERAL MEDICINE (see Internal Medicine), Quality in health care < HEALTH SERVICES ADMINISTRATION & MANAGEMENT, SOCIAL MEDICINE, INTERNAL MEDICINE                                                                                                                                                                                                                                                                                                                                                                                                                                                      |
|                                 |                                                                                                                                                                                                                                                                                                                                                                                                                                                                                                                                                                                                                       |

SCHOLARONE™  
Manuscripts



I, the Submitting Author has the right to grant and does grant on behalf of all authors of the Work (as defined in the below author licence), an exclusive licence and/or a non-exclusive licence for contributions from authors who are: i) UK Crown employees; ii) where BMJ has agreed a CC-BY licence shall apply, and/or iii) in accordance with the terms applicable for US Federal Government officers or employees acting as part of their official duties; on a worldwide, perpetual, irrevocable, royalty-free basis to BMJ Publishing Group Ltd ("BMJ") its licensees and where the relevant Journal is co-owned by BMJ to the co-owners of the Journal, to publish the Work in this journal and any other BMJ products and to exploit all rights, as set out in our [licence](#).

The Submitting Author accepts and understands that any supply made under these terms is made by BMJ to the Submitting Author unless you are acting as an employee on behalf of your employer or a postgraduate student of an affiliated institution which is paying any applicable article publishing charge ("APC") for Open Access articles. Where the Submitting Author wishes to make the Work available on an Open Access basis (and intends to pay the relevant APC), the terms of reuse of such Open Access shall be governed by a Creative Commons licence – details of these licences and which [Creative Commons](#) licence will apply to this Work are set out in our licence referred to above.

Other than as permitted in any relevant BMJ Author's Self Archiving Policies, I confirm this Work has not been accepted for publication elsewhere, is not being considered for publication elsewhere and does not duplicate material already published. I confirm all authors consent to publication of this Work and authorise the granting of this licence.

1  
2  
3 **Development and validation of a score to assess complexity of general internal medicine patients**  
4  
5 **at hospital discharge: a prospective cohort study**  
6  
7

8  
9 **Authors:** Fabian D. Liechti, MD-PhD<sup>1</sup>, Thomas Beck, MD<sup>1</sup>, Adrian Rüttsche, MD<sup>2</sup>, Marie C. Roumet<sup>3</sup>,  
10  
11 Andreas Limacher<sup>3</sup>, Tobias Tritschler, MD<sup>1,4</sup>, Jacques D. Donzé, MD, MSc<sup>1,5,6,7</sup>  
12  
13

14 **Author Affiliations:**  
15

16  
17 <sup>1</sup> Department of General Internal Medicine, Inselspital, Bern University Hospital, University of Bern, Bern,  
18  
19 Switzerland  
20

21 <sup>2</sup> Department of Technology and Innovation, Inselspital, Bern University Hospital, University of Bern, Bern,  
22  
23 Switzerland  
24

25 <sup>3</sup> CTU Bern, University of Bern, Bern, Switzerland  
26  
27

28 <sup>4</sup> Department of Medicine, Ottawa Hospital Research Institute, University of Ottawa, Ontario, Canada  
29  
30

31 <sup>5</sup> Division of General Medicine, Brigham and Women's Hospital, Harvard Medical School, Boston,  
32  
33 Massachusetts, USA  
34

35 <sup>6</sup> Division of general internal medicine, Lausanne \_University Hospital, Lausanne, Switzerland  
36  
37

38 <sup>7</sup> Neuchâtel Hospital Network, Department of medicine, Neuchâtel, Switzerland  
39  
40  
41  
42

43 **Corresponding author:** Fabian D. Liechti, Department of General Internal Medicine, Inselspital, Bern  
44  
45 University Hospital, 3010 Bern, Switzerland, e-mail: fabian.liechti@insel.ch  
46

47  
48 Phone: +41 (0)31 632 21 11  
49

50 **Word count:** 3390  
51  
52  
53  
54  
55  
56  
57  
58  
59  
60

1  
2  
3 **Author contributions:** All authors had full access to all the data in the study and take responsibility for  
4 the integrity of the data and the accuracy of the data analysis. FDL: Analysis and interpretation of data,  
5 drafting of the manuscript, critical revision of the manuscript for important intellectual content. TB:  
6 Acquisition of data, analysis and interpretation of data, critical revision of the manuscript for important  
7 intellectual content. AR: Acquisition of data, analysis and interpretation of data, critical revision of the  
8 manuscript for important intellectual content. MCR: Statistical analysis, analysis and interpretation of data,  
9 critical revision of the manuscript for important intellectual content. AL: Analysis and interpretation of data,  
10 critical revision of the manuscript for important intellectual content. TT: Analysis and interpretation of data,  
11 critical revision of the manuscript for important intellectual content. JDD: Study concept and design,  
12 acquisition of data, analysis and interpretation of data, administrative, technical, and material support,  
13 drafting of the manuscript, critical revision of the manuscript for important intellectual content.  
14  
15  
16  
17  
18  
19  
20  
21  
22  
23

24 **Funding:** This work was supported by SGIM foundation. JDD is supported by Swiss National Science  
25 Foundation (grant number 170656). TT is supported by an Early Postdoc.Mobility Award from the Swiss  
26 National Science Foundation (SNSF P2ZHP3\_177999) and a Fellowship Award from the CanVECTOR  
27 Network.  
28  
29  
30  
31  
32

33 **Competing interests:** None declared.  
34  
35

36 **Patient consent for publication:** Not required.  
37

38 **Data availability:** Data are available upon reasonable request.  
39  
40  
41  
42  
43  
44  
45  
46  
47  
48  
49  
50  
51  
52  
53  
54  
55  
56  
57  
58  
59  
60

## Abstract

**Objective:** We aimed to develop and validate a score to assess inpatient complexity and compare its performance with two currently used but not validated tools to estimate complexity (i.e., Charlson Comorbidity Index [CCI], patient clinical complexity level [PCCL]).

**Methods:** Consecutive patients discharged from the department of medicine of a tertiary care hospital were prospectively included into a derivation cohort from October 1, 2016 to February 16, 2017 (n=1,407), and a temporal validation cohort from February 17, 2017, to March 31, 2017 (n=482). The physician in charge assessed complexity. Potential predictors comprised 52 parameters from the electronic health record such as health factors and hospital care usage. We fit a logistic regression model with backward selection to develop a prediction model and derive a score. We assessed and compared performance of model and score in internal and external validation using measures of discrimination and calibration.

**Results:** Overall, 447 of 1,407 patients (32%) in the derivation cohort, and 116 of 482 patients (24%) in the validation cohort were identified as complex. Eleven variables independently associated with complexity were included in the score. Using a cut-off of  $\geq 24$  score points to define high-risk patients, specificity was 81% and sensitivity 57% in the validation cohort. The score's area under the receiver operating characteristic (AUROC) curve was 0.78 in both the derivation and validation cohort. In comparison, the CCI had an AUROC between 0.58 and 0.61, and the PCCL between 0.64 and 0.69, respectively.

**Conclusions:** We derived and internally and externally validated a score that reflects patient complexity in the hospital setting, performed better than other tools, and could help monitoring complex patients.

### Strengths and limitations of this study

- This is a prospective cohort study of consecutive, unselected, adult inpatients discharged from the department of medicine of a large university hospital.
- We derived and validated an easily usable score that accurately assesses patient complexity in medical inpatients that may help monitoring the proportion of complex patients (Patient Complexity Assessment (PCA) score).
- The reference standard used to define complexity was the physician's judgment, which per definition is partly subjective.
- The PCA score has been developed at a single tertiary hospital and may not consider a comprehensive list of important indicators.
- The PCA score includes values available only at discharge and indicators are not modifiable.

**Keywords:** primary care, general medicine, quality in health care, social medicine, internal medicine

## Introduction

One fourth of patients are estimated to be complex in the primary care setting, while this proportion is not well known in the hospital setting.[1-4] Generally, those patients using more resources, time and/or effort are regarded as complex patients, although no universal definition of patient complexity is available.

Complexity is not limited to multimorbidity and chronicity of disease but depends also on multiple other aspects, including psychological, social, economic and environmental factors.[1,2,5-7] Complex patients challenge the current structures, e.g., they have a higher probability of future emergency department utilization (without higher mortality rates) and show suboptimal use of the health care system.[2,8-10]

Identifying complex patients is of economic, epidemiological and social importance because it may help to better allocate resources and improve health care utilization.[5,11]

The only available assessment method to identify complex inpatients is currently the physician's assessment, which limits the monitoring of patient complexity over time.[10,12,13] The Charlson Comorbidity Index (CCI), originally developed and validated to predict mortality,[14] has been assessed as a proxy for patient complexity in the primary care setting. However, agreement between the primary care physician's assessment and the CCI to identify complex patients was only modest.[1,2,5] No such assessment has been yet performed in the hospital setting. The patient clinical complexity level (PCCL) is calculated for each treatment episode to indicate the effect of complications and comorbidities in a patient. The PCCL ranges from 0 (no complication or comorbidity) to 4 (very severe complication or comorbidity), according to a complex algorithm. [14,15] Identification of complex patients at discharge could help to identify those, who would profit from more intense follow-up, e.g. by general practitioners or social workers, although effectiveness of such interventions would have to be proven first.

In order to simplify and standardize the identification of complex patients, we aimed to develop and validate a new score to help identifying the most complex inpatients (Patient Complexity Assessment, PCA score) using readily available administrative and clinical data. Our hypothesis was that some data routinely collected during a hospitalization can be used as a valuable surrogate to physician's assessment. We then compared the performance of the newly developed PCA score to the CCI, and the PCCL used in the Swiss DRG system to allocate reimbursement according to multimorbidity.[14,15]

## Methods

### Study design and participants

This study was a prospective cohort of consecutive, unselected, adult inpatients discharged from the department of medicine of a large University hospital (Inselspital, Bern University Hospital, Bern, Switzerland) between October 1, 2016 and March 31, 2017. The only exclusion criterion was a previous study inclusion. We originally planned to consider around 35 variables in the prediction model. With an estimated proportion of complex patients of one fourth, we preset the sample size of the derivation cohort to be 1,400 (rule of thumb of 10 outcomes per variable tested).[16,17] We predefined, that if more than 1,400 patients will be included during the study period of 6 months, we would use these patients to externally validate the prediction model. Patients enrolled before February 16, 2017 were allocated to the derivation sample (derivation and internal validation cohort), and patients enrolled after this date were allocated to an external validation sample (temporal validation cohort). During their first admission, all patients included in the study gave their written general consent to the use of their routine data for research purposes. The study was approved by the local ethics committee (Kantonale Ethikkommission Bern, ID 2016-01319). We reported the study in accordance with the Transparent Reporting of a Multivariable Prediction Model for Individual Prognosis Or Diagnosis (TRIPOD) statement.[18]

### Patient and public involvement

No patient involved.

### Study outcome and predictor variables

The primary outcome was the predictive accuracy of the PCA against the treating physician's judgment as the gold standard to identify complex general internal medicine inpatients. Complex patients were defined as those using more resources, time and/or effort while hospitalized. The resident (or supervising consultant) was asked by a trained study nurse to assess at time of discharge the level of complexity of the entire hospital stay of her/his patient (complex or not-complex).

The CCI was originally developed to predict 10-year survival by using an algorithm based on addition of score points for specific diagnoses.[14,19] The PCCL was derived from the electronic health record (no complication or comorbidity: 0; light complication or comorbidity: 1; moderate complication or comorbidity:



1  
2  
3 2; severe complication or comorbidity: 3; very severe complication or comorbidity: 4) and is defined by  
4 SwissDRG.[20,21]  
5

6  
7 For all patients, information regarding International Classification of Disease (ICD) codes and other  
8 potential indicators for patient complexity were collected retrospectively through the electronic health  
9 record of the hospital. Candidate predictor variables have been selected based on a previous survey  
10 among general internists in the hospital setting which asked them to identify factors that contribute to  
11 patient complexity,[4] and on a selection of readily available potential predictors to have a broad spectrum  
12 of candidate predictors. Variables that were not routinely collected were removed (i.e. variables with more  
13 than 25% missing data, such as aspartate amino transferase, C-reactive protein, and albumin at  
14 discharge). Collinearity between variables was assessed using Pearson correlation coefficients. In case of  
15 strong correlation ( $r > 0.7$ ), only the strongest univariate predictor was kept. A final list of 52 indicators was  
16 considered in denoting complexity: baseline demographic information (age, gender, living area (rural  
17 versus urban, defined according to the Swiss Federal Statistical Office based on the patient's place of  
18 residence ), marital status, institutional care before admission, nationality (Swiss vs. non-Swiss), hospital  
19 variables (urgent vs. elective admission, number of previous hospitalization in the last 12 months, patient  
20 destination [death, home, other hospital, nursing home, rehabilitation, other], stay on the intensive care  
21 unit, internal transfer), drugs (for each group of the Anatomical, Therapeutic and Chemical [ATC]  
22 classification categories) at admission and at discharge and polypharmacy ( $\geq 10$  drugs [22], at admission  
23 and discharge ), main diagnosis (cancer, chronic obstructive pulmonary disease, dementia, depression,  
24 heart failure, pneumonia, sepsis, stroke, substance abuse, syncope, malnutrition, based on the Tenth  
25 Revision of the International Statistical Classification of Diseases and Related Health Problems [ICD-10]  
26 code), number of diagnoses at discharge, CCI, laboratory values (hemoglobin, leucocyte count and  
27 thrombocyte count, serum sodium and creatinine) at admission (first lab values at admission) and  
28 discharge (last lab values before discharge), number of interventions and costs (normal vs. high costs,  
29 i.e.,  $\geq$  the 75<sup>th</sup> empirical percentile value) during hospitalization of blood products, drugs, imaging  
30 procedures, physiotherapy, and nursing workload.  
31  
32  
33  
34  
35  
36  
37  
38  
39  
40  
41  
42  
43  
44  
45  
46  
47  
48  
49  
50  
51  
52  
53  
54  
55  
56  
57  
58  
59  
60

### Missing data

When missing, the value of hemoglobin and creatinine at discharge was assumed to be identical to the value at admission. When missing, the value of sodium and platelet count at discharge was considered normal. For other potential indicators of complexity, we assumed data to be missing at random and imputed missing data using single imputation by chained equations. To compare performance measures of the PCA with the CCI and PCCL, patients with missing values for the PCCL variable (n=3 for the derivation, n=11 for the validation dataset) were removed prior to analysis.

### Statistical analysis

Multivariable logistic regression analysis with backward selection was used in the derivation set to predict complexity based on 52 potential indicators of complexity variables registered during hospitalization, removing variables with a p-value >0.1. Calibration of the final model was evaluated by constructing a calibration curve, estimating the calibration slope, calculating the difference between the mean observed proportion and mean predicted proportion of patients with high complexity (calibration-in-the-large) and the Brier score (overall measure of accuracy) in the derivation and validation set. The predictors from the final model were used to create a comprehensible score using the regression coefficient-based scoring technique.[23] Beta-coefficients were divided by the lowest coefficient and rounded up to the closest integer to generate score points, indicating increasing risk by higher scores. The discriminatory power of the score was assessed by calculating the area under the receiver operating characteristic (AUROC) curve.

The validity of performance measures was investigated by performing internal and external validation. For internal validation we used 1000 bootstrap samples, drawing samples with replacement from the derivation sample.[24] The bootstrap-corrected performance estimates were calculated by subtracting the optimism from the performance of the original model. The 95% confidence intervals (CI) for the bootstrapped performance measures were derived using the percentile method. External validation was made by estimating the same performance measures in the external validation cohort (temporal validation).

The clinical usefulness of the developed score was assessed with a decision-curve analysis investigating whether the use of the complexity score instead of the CCI alone was associated with benefit gains relative to the prediction complexity.[25]

Applying PCA, CCI and PCCL, we calculated the score of each patient and split the patient sample into a high and a low risk group. The reference point (cut-off) of each scoring system was chosen in order to make the frequency of patients in the high-risk category as close as possible to 30% (i.e. approximating the frequency of observed complex patients). To determine the accuracy of this method to predict complexity, we estimated sensitivity, specificity, and positive and negative predictive value in both the derivation and validation set for PCA and in the derivation set for CCI and PCCL.

R version 3.3.1 was used for statistical analysis.

## Results

A total of 1,889 patients were included in the study (figure 1). Patients enrolled before February 16, 2017 were allocated to the derivation sample (n = 1,407), patients enrolled after this date (n = 482) were allocated to the temporal validation sample. In the derivation cohort, 447 patients (31.8%) were reported as complex, and 116 (24.1%) patients in the validation cohort. The patients in the two cohorts presented with similar baseline characteristics (table 1 and supplementary material table S1 and S2). The overall median age was 80 years (interquartile range 75 to 86 years).

**Table 1: Baseline characteristics for all patients (derivation and validation cohort) stratified by complexity, as number and percentage or median and inter-quartile range for categorical and continuous variables, respectively.**

|                | Overall<br>(N=1889)                   | Non-<br>complex<br>(N=1326) | Complex<br>(N=563) |
|----------------|---------------------------------------|-----------------------------|--------------------|
|                | n (%) or median [interquartile range] |                             |                    |
| <b>Age</b>     |                                       |                             |                    |
| ≥ 80 years     | 579 (31)                              | 442 (33)                    | 137 (24)           |
| 70 to 79 years | 437 (23)                              | 304 (23)                    | 133 (24)           |
| 60 to 69 years | 322 (17)                              | 211 (16)                    | 111 (20)           |
| < 60 years     | 537 (28)                              | 363 (27)                    | 174 (31)           |
| Missing        | 14 (0.7)                              | 6 (0.5)                     | 8 (1.4)            |
| <b>Gender</b>  |                                       |                             |                    |
| Male           | 1002 (53)                             | 693 (52)                    | 309 (55)           |
| Female         | 873 (46)                              | 627 (47)                    | 246 (44)           |
| Missing        | 14 (0.7)                              | 6 (0.5)                     | 8 (1)              |

|                                                                                  |           |          |          |
|----------------------------------------------------------------------------------|-----------|----------|----------|
| <b>Living area<sup>1</sup></b>                                                   |           |          |          |
| Urban                                                                            | 611 (32)  | 453 (34) | 158 (28) |
| Rural                                                                            | 1238 (65) | 848 (64) | 390 (69) |
| Missing                                                                          | 40 (2)    | 25 (1)   | 15 (3)   |
| <b>Marital status</b>                                                            |           |          |          |
| Single                                                                           | 331 (17)  | 252 (19) | 79 (14)  |
| Couple                                                                           | 636 (34)  | 429 (32) | 207 (37) |
| Widowed                                                                          | 916 (48)  | 641 (48) | 275 (49) |
| Missing                                                                          | 6 (0.3)   | 4 (0.3)  | 2 (0.4)  |
| <b>Hospitalization within last 12 months</b>                                     | 673 (36)  | 452 (34) | 221 (39) |
| <b>Medication<sup>2</sup></b>                                                    |           |          |          |
| Antineoplastic and immunomodulating agents at admission                          | 70 (4)    | 38 (3)   | 32 (6)   |
| Nervous system at admission                                                      | 1340 (71) | 918 (69) | 422 (75) |
| Systemic hormonal preparations, excluding sex hormones and insulins at discharge | 524 (28)  | 318 (24) | 206 (37) |
| <b>High costs during hospitalization<sup>3</sup></b>                             |           |          |          |
| For imaging procedures                                                           | 485 (26)  | 255 (19) | 230 (41) |
| For laboratory analysis                                                          | 482 (25)  | 203 (15) | 279 (50) |
| <b>High nurse workload<sup>4</sup></b>                                           | 475 (25)  | 203 (15) | 272 (48) |
| <b>Charlson Comorbidity Index</b>                                                | 2 [0; 4]  | 2 [0; 3] | 3 [1; 5] |
| <b>Principal or concomitant diagnosis at discharge</b>                           |           |          |          |
| Cancer <sup>5</sup>                                                              | 225 (12)  | 136 (10) | 89 (16)  |
| COPD <sup>6</sup>                                                                | 186 (10)  | 124 (9)  | 62 (11)  |
| Dementia <sup>7</sup>                                                            | 163 (9)   | 125 (9)  | 38 (7)   |
| Depression <sup>8</sup>                                                          | 209 (11)  | 140 (11) | 69 (12)  |
| Heart failure <sup>9</sup>                                                       | 327 (17)  | 206 (15) | 121 (21) |
| Pneumonia <sup>10</sup>                                                          | 244 (13)  | 159 (12) | 85 (15)  |
| Sepsis <sup>11</sup>                                                             | 229 (12)  | 132 (10) | 97 (17)  |
| Stroke <sup>12</sup>                                                             | 90 (5)    | 65 (5)   | 25 (4)   |
| Substance abuse <sup>13</sup>                                                    | 212 (11)  | 129 (10) | 83 (15)  |
| Syncope <sup>14</sup>                                                            | 81 (4)    | 67 (5)   | 14 (2)   |
| Malnutrition <sup>15</sup>                                                       | 265 (14)  | 122 (9)  | 143 (25) |
| <b>Multimorbidity</b>                                                            |           |          |          |
| Low (number of diagnoses ≤ 6)                                                    | 510 (27)  | 435 (33) | 75 (13)  |

<sup>1</sup> Defined according to the Swiss Federal Statistical Office based on place of residence

<sup>2</sup> Group of drugs according to ATC classification

<sup>3</sup> Defined as costs of all imaging procedures or medication during hospital stay above 75<sup>th</sup> percentile

<sup>4</sup> Defined as sum of hours of all nursing work (incl. sitting guard) during hospital stay above 75<sup>th</sup> percentile

<sup>5</sup> ICD10-codes B21, C00 through C97, Z03.1

<sup>6</sup> ICD10-codes J44

<sup>7</sup> ICD10-codes F00 through F03, F05.0, F05.1

<sup>8</sup> ICD10-codes F20.4, F25.1, F31.3 F31.4, F31.5, F32, F33, F41.2, F92.0

<sup>9</sup> ICD10-codes I50

<sup>10</sup> ICD10-codes A48.1, B01.2, B05.2, J10.0, J11.0, J12 through J18, J68.0, J69, J85.1, O74.0, U69.00

<sup>11</sup> ICD10-codes A02.1, A20.7, A22.7, A26.7, A32.7, A39.2, A39.3, A39.4, A40, A41, A42.7, B37.7

<sup>12</sup> ICD10-codes I63

<sup>13</sup> ICD10-codes F10 through F19, F53, F66.8, F66.9

<sup>14</sup> ICD10-codes R55

<sup>15</sup> ICD10-codes E40 through E46

|                                                        |           |          |          |
|--------------------------------------------------------|-----------|----------|----------|
| Middle (number of diagnoses > 6 and <14) <sup>16</sup> | 841 (44)  | 603 (45) | 238 (42) |
| High (number of diagnoses ≥ 14)                        | 524 (28)  | 282 (21) | 242 (43) |
| <b>PCCL</b>                                            | 3 [2; 4]  | 3 [1; 4] | 4 [3; 4] |
| No complication or comorbidity                         | 380 (20)  | 312 (23) | 68 (12)  |
| Light complication or comorbidity                      | 29 (1)    | 21 (2)   | 8 (1)    |
| Moderate complication or comorbidity                   | 292 (15)  | 233 (18) | 59 (10)  |
| Severe complication or comorbidity                     | 533 (28)  | 409 (31) | 124 (22) |
| Very severe complication or comorbidity                | 641 (34)  | 345 (26) | 296 (53) |
| Missing                                                | 14 (0.7)  | 6 (0.5)  | 8 (1.4)  |
| <b>Abnormal creatinine level<sup>17</sup></b>          |           |          |          |
| At admission and discharge                             | 368 (19)  | 241 (18) | 127 (23) |
| At admission only                                      | 182 (10)  | 106 (8)  | 76 (13)  |
| At discharge only                                      | 63 (3)    | 34 (3)   | 29 (5)   |
| Missing                                                | 364 (19)  | 311 (23) | 53 (9)   |
| <b>Leukocytosis<sup>18</sup></b>                       |           |          |          |
| At admission and discharge                             | 77 (41)   | 47 (3)   | 30 (5)   |
| At admission only                                      | 19 (1)    | 8 (<1)   | 11 (2)   |
| At discharge only                                      | 13 (<1)   | 5 (<1)   | 8 (1)    |
| Missing                                                | 351 (19)  | 306 (23) | 45 (8)   |
| <b>Patient destination</b>                             |           |          |          |
| Death                                                  | 134 (7)   | 91 (7)   | 43 (8)   |
| Home                                                   | 1178 (62) | 873 (66) | 305 (54) |
| Hospital                                               | 191 (10)  | 119 (9)  | 72 (13)  |
| Nursing home                                           | 155 (8)   | 108 (8)  | 47 (8)   |
| Rehabilitation                                         | 171 (9)   | 101 (8)  | 70 (12)  |
| Others and missing                                     | 60 (3)    | 24 (3)   | 26 (5)   |

After backward selection, 11 of the 52 potential predictors were used to derive the PCA score (Table 2). Besides diagnosis-related factors, they represented demographic characteristic, hospital variables, medication and laboratory values. Highest score points were assigned to leukocytosis (at discharge only, 16 points, and at admission and discharge, 10 points) followed by age under 60 years, high nurse workload (costs above 75<sup>th</sup> percentile for nursing expenses), and abnormal serum creatinine at discharge ( $\geq 100 \mu\text{mol/l}$ ).

**Table 2: PCA score weighted according to coefficients**

| Variable       | Coefficient (95% CI) | Score points |
|----------------|----------------------|--------------|
| <b>Age</b>     |                      |              |
| ≥ 80 years     | Reference            |              |
| 70 to 79 years | 0.36 (0, 0.72)       | 3            |

<sup>16</sup> Between 25<sup>th</sup> and 75<sup>th</sup> percentile

<sup>17</sup> Defined as creatinine  $\geq 100 \mu\text{mol/l}$

<sup>18</sup> Defined as leukocyte count  $\geq 20 \text{ G/l}$

|                                                       |                      |    |
|-------------------------------------------------------|----------------------|----|
| 60 to 69 years                                        | 0.5 (0.1, 0.9)       | 5  |
| < 60 years                                            | 0.94 (0.56, 1.31)    | 9  |
| <b>Elective admission</b>                             | 0.36 (0.03, 0.69)    | 3  |
| <b>High costs during hospitalization<sup>19</sup></b> |                      |    |
| For imaging procedures                                | 0.6 (0.31, 0.9)      | 6  |
| For laboratory analysis                               | 0.77 (0.46, 1.09)    | 7  |
| <b>High nurse workload<sup>20</sup></b>               | 0.93 (0.61, 1.26)    | 9  |
| <b>Malnutrition<sup>21</sup></b>                      | 0.47 (0.1, 0.84)     | 4  |
| <b>Multimorbidity</b>                                 |                      |    |
| Number of diagnoses ≤ 6                               | Reference            |    |
| Number of diagnoses > 6 and <14 <sup>22</sup>         | 0.61 (0.25, 0.96)    | 6  |
| Number of diagnoses ≥ 14 <sup>23</sup>                | 0.78 (0.36, 1.2)     | 7  |
| <b>Medication at admission<sup>24</sup></b>           |                      |    |
| Antineoplastic and immunomodulating agents            | 0.85 (0.16, 1.54)    | 8  |
| Nervous system                                        | 0.33 (0.04, 0.63)    | 3  |
| <b>Abnormal creatinine level<sup>25</sup></b>         |                      |    |
| None                                                  | Reference            |    |
| At admission only                                     | 0.23 (-0.22, 0.68)   | 2  |
| At admission and discharge                            | 0.11 (-0.22, 0.45)   | 1  |
| At discharge only                                     | 0.96 (0.29, 1.63)    | 9  |
| <b>Leukocytosis<sup>26</sup></b>                      |                      |    |
| None                                                  | Reference            |    |
| At admission only                                     | 0.11 (-0.49, 0.71)   | 1  |
| At admission and discharge                            | 1.12 (-0.04, 2.29)   | 10 |
| At discharge only                                     | 1.68 (0.18, 3.18)    | 16 |
| <b>Intercept</b>                                      | -2.93 (-3.39, -2.46) | NA |

The prediction model showed a good accuracy, with a Brier score of 0.17 and 0.15 in internal and external validation, respectively. The calibration curve showed fair agreement between predicted and observed proportions of complexity in the derivation cohort and slightly lower observed proportions than predicted probabilities in the validation cohort (graphs not shown). The calibration-in-the-large coefficient of -0.51 (95% CI -0.74 to -0.27) in the validation cohort implies that the mean observed proportion was lower than

<sup>19</sup> Defined as costs of all imaging procedures or medication during hospital stay above 75<sup>th</sup> percentile

<sup>20</sup> Defined as sum of hours of all nursing work (incl. sitting guard) during hospital stay above 75<sup>th</sup> percentile

<sup>21</sup> ICD10-codes E40 through E46

<sup>22</sup> Between 25<sup>th</sup> and 75<sup>th</sup> percentile

<sup>23</sup> Above 75<sup>th</sup> percentile

<sup>24</sup> Group of drugs according to ATC classification

<sup>25</sup> Defined as serum creatinine ≥100 µmol/l

<sup>26</sup> Defined as blood leukocyte count ≥20 G/l

the mean predicted probability. However, the calibration curve slope was satisfactory in internal and external validation (0.93 [95% CI 0.80 to 1.05] and 0.96 [95% CI 0.74 to 1.18]), respectively.

The median score was 17 points in the derivation and validation cohort (mean 18.77 and 19.03, respectively). The minimal score was 0 points in both cohorts, the maximal score reached was 54 points in the derivation cohort and 53 points in the validation cohort (theoretically maximal 81 score points). The score's area under the receiver operating characteristic (AUROC) curve was 0.77 (95% CI 0.74 to 0.79) and 0.78 (95% CI 0.74 to 0.82) in internal and external validation.

**Table 3: Stratification of Observed vs. predicted complex patients applying the PCA score.**

|                       | Score points | Risk category of complexity | Patients in each category | Complex patients | Estimated risk of complexity |
|-----------------------|--------------|-----------------------------|---------------------------|------------------|------------------------------|
| <b>Derivation set</b> | < 24         | Low risk                    | 991 (70%)                 | 193 (19%)        | 19                           |
|                       | ≥ 24         | High risk                   | 416 (30%)                 | 254 (61%)        | 61                           |
| <b>Validation set</b> | < 24         | Low risk                    | 347 (72%)                 | 50 (14%)         | 20                           |
|                       | ≥ 24         | High risk                   | 135 (28%)                 | 66 (49%)         | 62                           |

We classified patients as low and high complexity risk (table 3) according to the selected cut-off of 24 points (approximating the frequency of observed complex patients of 30%). The proportion of patients categorized as complex (i.e. score ≥ 24 points) was 30% and 28% in the derivation and validation dataset, respectively. Sensitivity was 57% in both the derivation and validation dataset. The specificity was 83% and 81%, respectively. Positive predictive values were 61% and 49% in the derivation and validation cohort, respectively, while negative predictive values were 81% and 86%, respectively. The discriminatory power of the PCA score was robust with an AUROC of 0.77 (95% CI 0.74 to 0.79) in internal validation (bootstrap-corrected value) and 0.78 (95% CI 0.74 to 0.82) in external validation (table 4 and supplementary figure S2).

**Table 4: Measures of performance to predict complexity**

|                                  | PCA, derivation set % (95%-CI) | PCA, validation set % (95%-CI) | CCI, validation set % (95%-CI) | PCCL, validation set % (95%-CI) |
|----------------------------------|--------------------------------|--------------------------------|--------------------------------|---------------------------------|
| <b>Sensitivity</b>               | 57 (52-61)                     | 57 (47-66)                     | 41 (32-50)                     | 61 (51-70)                      |
| <b>Specificity</b>               | 83 (81-85)                     | 81 (77-85)                     | 75 (71-80)                     | 75 (70-79)                      |
| <b>Positive predictive value</b> | 61 (59-66)                     | 49 (40-58)                     | 34 (26-43)                     | 42 (34-50)                      |
| <b>Negative predictive value</b> | 81 (78-83)                     | 86 (81-89)                     | 80 (75-84)                     | 86 (82-90)                      |

| Misclassification error | 25 (28-23)                     | 25 (29-21)       | 33 (37-29)       | 28 (33-24)       |
|-------------------------|--------------------------------|------------------|------------------|------------------|
| AUROC <sup>27</sup>     | 0.77 (0.74-0.79) <sup>28</sup> | 0.78 (0.74-0.82) | 0.62 (0.56-0.68) | 0.69 (0.64-0.75) |

In comparison, predictive accuracy of the CCI was lower compared to the PCA score. The AUROCs were low with 0.58 (95% CI 0.55 to 0.62) and 0.62 (95% CI 0.56 to 0.68) in the derivation and validation cohort, respectively (table 4). Sensitivity of the CCI reached 36% (95% CI 31% to 40%) and 41% (95% CI 31% to 50%) in derivation and validation cohort, respectively, while specificity was 76% (95% CI 73% to 78%) and 75% (95% CI 71% to 80%), respectively. The decision curve analysis (supplementary figure S1) indicates a superiority of the PCA score compared to the CCI to predict complexity.

AUROCs of PCCL were between those of CCI and PCA score with 0.64 (95% CI 0.61 to 0.67) and 0.69 (95% CI 0.64 to 0.75) in the derivation and validation cohort, respectively (table 4). Sensitivity was 52% (95% CI 47% to 56%) and 61% (95% CI 51% to 70%), respectively, while specificity was 73% (95% CI 71% to 76%) and 75% (95% CI 70% to 79%).

## Discussion

We derived and validated the PCA score that accurately assessed patient complexity in medical inpatients. The final score of eleven independent and readily available factors, included age, hospital variables, diagnosis related aspects and laboratory variables. The PCA score showed overall good performance with a discriminatory power of 0.78 that surpasses other comorbidity-based tools such as the Charlson comorbidity index and the PCCL.

In this cohort of medical inpatients, 32% and 24% were considered “complex” by the treating physician, in the derivation and the validation cohort, respectively. This first estimate of patient complexity in the hospital setting is consistent with a previous assessment in an outpatient population where 26% of total 4,302 patients were categorized as being complex by a primary care physician.[1] Based on these data, the authors later derived a model to identify around 20% of 143,372 primary care patients as complex.

<sup>27</sup> Area under receiver operating characteristic

<sup>28</sup> Bootstrap-corrected from internal validation



1  
2  
3 Using the model and outpatient CCI or PCCL, only modest agreement between the methods was  
4 observed (37% and 40%, respectively).[2] Therefore, a tool not solely based on multimorbidity, such as  
5 the newly developed PCA score, seems to better identify complex patients.  
6  
7

8  
9 In the present study, age was an inverse indicator of complexity. In a previous study of outpatients, mean  
10 age of complex patients was 60 years versus 48 years in non-complex patients.[1] Nonetheless, the same  
11 study reported noteworthy age-related variability: in younger patients the association of certain diagnoses  
12 (e.g. alcohol-related diseases) with complexity was stronger, and deprivation as contributor to complexity  
13 is independent of age.[1,5] In our setting, discharge planning processes for older patients may be better  
14 established (e.g. including hospital social services, decision making based on patient's provision and  
15 possibility for indiscriminate discharge to geriatric rehabilitation facilities or nursing homes) compared to  
16 younger patients.[1,9,26,27] Treating physicians may therefore perceive the discharge planning process of  
17 some younger patients as difficult and categorize these patients as complex. Furthermore, young non-  
18 complex patients may more often be treated as outpatients or by specialist's clinics instead of our tertiary  
19 care general internal medicine ward. Elective admissions to a tertiary hospital may represent a cohort of  
20 rather complex patients preselected by primary care physicians and smaller hospitals (21% elective  
21 admissions in complex patients versus 14% in non-complex patients). It is also possible that these  
22 patients are only perceived as more complex by the treating physician because patients admitted directly  
23 to the medical ward are pending initial work-up otherwise provided in the emergency department.  
24  
25  
26  
27  
28  
29  
30  
31  
32  
33  
34  
35  
36  
37  
38

39 Patients with high costs of imaging procedures may reflect the patients with more severe diseases or  
40 more diagnosis uncertainty. Similarly, high costs for laboratory analysis may be explained by a higher  
41 need of costly or repeated measurements in more complex patients. High costs for care/nursing were  
42 indicators of complexity highlighting some concordance between the nurse workload and the medical  
43 complexity.  
44  
45  
46  
47  
48

49 In our study multimorbidity (defined as a number of more than 6 diagnoses) was an indicator of  
50 complexity. Comorbidity-based scores, i.e., the CCI, are commonly used to identify complex patients.  
51 Indeed, in the study of Grant et al. the proportion of multimorbid patients identified by a CCI of 2 or more  
52 was higher in complex patients, i.e., 26% of complex patients were multimorbid versus 9% of non-complex  
53 patients.[1] However, many multimorbid patients are not complex and not all complex patients are  
54  
55  
56  
57  
58  
59

1  
2  
3 multimorbid. In our cohort (derivation and validation datasets together) 34% of polymorbid patients (CCI  
4  $\geq 2$ ) were complex versus 24% in the group of CCI  $< 2$ . Comparably, nearly one half of patients with a CCI  
5 of 2 or greater were classified as non-complex in the study of Grant et al.[1] Therefore, a system to identify  
6 complexity should not depend on diagnosis alone.  
7  
8  
9

10  
11 In the PCA score, malnutrition was a risk factor of complexity. Malnutrition in hospitalized patients is  
12 associated with more complications, increased mortality, longer hospital stays and higher costs [28,29].  
13 Therefore, malnutrition and complexity may both reflect a cluster of severe and chronic disease as well as  
14 socioeconomic circumstances.[1]  
15  
16  
17  
18

19 Antineoplastic and immunomodulating medication at admission was an indicator of complexity. These  
20 drugs are used for oncologic patients, but also in patients with rheumatologic disease or after receiving  
21 organ transplants. These patients may be complex because of challenging infectious diseases, end-of-life  
22 issues and interdisciplinary care. Abnormal values of serum creatinine and leukocyte counts at discharge  
23 were denoting complexity whether the values were normal or abnormal at admission. These patients may  
24 also requiring more interaction between specialists and may complicate the discharge process.  
25  
26  
27  
28  
29  
30

31 Personal characteristics or mental health issues and use of psychoactive medication, i.e., narcotics,  
32 selective serotonin reuptake inhibitors, benzodiazepines, smoking cessation agents and antipsychotics,  
33 have been described as characterizing complex patients, especially in younger patients.[1] This is in line  
34 with the observation that in the PCA score, use of medication affecting the nervous system at admission  
35 (including antipsychotics, mood-stabilizers, sedatives, analgesics including opioids, anticonvulsive  
36 medication and anti-dementia drugs) was an indicator of complexity. These patients may challenge the  
37 known pathways of the healthcare system, e.g. by parallel use of general internal medicine and psychiatric  
38 resources.  
39  
40  
41  
42  
43  
44  
45  
46

47 There are several limitations of the study. First, we used physician's assessment to define complexity,  
48 which per definition is subjective. Nonetheless, there is no better standard reference (gold standard) and  
49 the proportion of patients identified as complex was similar in previous studies.[1,2] Second, the PCA  
50 score has been developed at a single tertiary hospital in Switzerland and therefore may not be  
51 generalizable to other settings, e.g. other health care systems. However, costs and nursing workload are  
52 not measured as absolute values but as those above the 75<sup>th</sup> percentile, making it transferable to other  
53  
54  
55  
56  
57  
58  
59

1  
2  
3 settings. Also, some patients may appear as complex in one setting, while they will be judged as non-  
4  
5 complex in other settings (e.g. primary care vs. university hospital), nevertheless the proportion of  
6  
7 complex patients in our setting was similar to the one in primary care.[1] Third, it is likely that our model  
8  
9 does not consider every important indicator, but it allows deriving an easily usable tool which kept its fair  
10  
11 sensitivity and good specificity in our external validation. Fourth, the PCA score includes values available  
12  
13 only at discharge, which makes patient-aimed interventions during hospitalization difficult. This is however  
14  
15 also true for alternative assessment tools, such as the CCI and the PCCL, which had a lower performance  
16  
17 in identifying complex patients in our cohort. Fifth, imputation of missing data may have changed the  
18  
19 outcome of the study. However, potential predictors with more than 25% missing data were excluded.  
20  
21 Sixth, most of the included indicators are not modifiable. For example, a patient will still be complex if  
22  
23 receiving less imaging procedures to reduce costs.

24  
25 To our knowledge, the PCA score is the first tool to identify complex medical patients in the hospital  
26  
27 setting. It can easily be calculated and is therefore predestined to be used for population-based studies as  
28  
29 it does not involve individual judgement of a physician. With its prospective design and inclusion of a large  
30  
31 number of medical inpatients, this study has a strong design.

32  
33 Identification of complex patients by this simple tool using electronically available data may help  
34  
35 monitoring the proportion of complex patients in the hospital setting and comparing patient complexity  
36  
37 level between hospitals. Thereby, the PCA score might improve the monitoring of resources distribution  
38  
39 and coordination of care, e.g. by flagging complex patients to general practitioners or social workers for  
40  
41 closer follow-up or low-threshold service.  
42  
43  
44  
45  
46  
47  
48  
49  
50  
51  
52  
53  
54  
55  
56  
57  
58  
59  
60

## Acknowledgements

We acknowledge the support by Roland Angerer (coding data) and Barbara Ammann (workload nurse).

## References

1. Grant RW, Ashburner JM, Hong CS, Chang Y, Barry MJ, et al. (2011) Defining patient complexity from the primary care physician's perspective: a cohort study. *Ann Intern Med* 155: 797-804.
2. Hong CS, Atlas SJ, Ashburner JM, Chang Y, He W, et al. (2015) Evaluating a Model to Predict Primary Care Physician-Defined Complexity in a Large Academic Primary Care Practice-Based Research Network. *J Gen Intern Med* 30: 1741-1747.
3. Katerndahl D (2014) Providing complex (rather than complicated) chronic care. *J Am Board Fam Med* 27: 6-7.
4. Crelier B, Streit S, Donzé JD (2018) Patient Complexity Characteristics in the Hospital Setting. *The American Journal of Accountable Care* 9: 3-8.
5. Mercer SW, Guthrie B, Furler J, Watt GC, Hart JT (2012) Multimorbidity and the inverse care law in primary care. *BMJ* 344: e4152.
6. Peek CJ, Baird MA, Coleman E (2009) Primary care for patient complexity, not only disease. *Fam Syst Health* 27: 287-302.
7. Safford MM, Allison JJ, Kiefe CI (2007) Patient complexity: more than comorbidity. the vector model of complexity. *J Gen Intern Med* 22 Suppl 3: 382-390.
8. Gupta S, Perry JA, Kozar R (2019) Transitions of Care in Geriatric Medicine. *Clin Geriatr Med* 35: 45-52.

- 1  
2  
3 9. Kutz A, Ebrahimi F, Struja T, Greenwald J, Schuetz P, et al. (2017) Innovative transition  
4 interventions to better align healthcare needs in hospitalised medical patients. *Swiss Med Wkly*  
5 147: w14515.  
6  
7
- 8  
9  
10 10. Schaink AK, Kuluski K, Lyons RF, Fortin M, Jadad AR, et al. (2012) A scoping review and  
11 thematic classification of patient complexity: offering a unifying framework. *J Comorb* 2: 1-9.  
12  
13
- 14  
15 11. Sturmberg JP, Martin CM, Katerndahl DA (2014) Systems and complexity thinking in the  
16 general practice literature: an integrative, historical narrative review. *Ann Fam Med* 12: 66-74.  
17  
18
- 19  
20 12. Sturmberg JP, Martin CM, Katerndahl DA (2017) It is complicated! - misunderstanding the  
21 complexities of 'complex'. *J Eval Clin Pract* 23: 426-429.  
22  
23
- 24  
25 13. Weiss KB (2007) Managing complexity in chronic care: an overview of the VA state-of-the-art  
26 (SOTA) conference. *J Gen Intern Med* 22 Suppl 3: 374-378.  
27  
28
- 29  
30 14. Charlson ME, Pompei P, Ales KL, MacKenzie CR (1987) A new method of classifying  
31 prognostic comorbidity in longitudinal studies: development and validation. *J Chronic Dis* 40:  
32 373-383.  
33  
34
- 35  
36 15. Mehra T, Muller CT, Volbracht J, Seifert B, Moos R (2015) Predictors of High Profit and High  
37 Deficit Outliers under SwissDRG of a Tertiary Care Center. *PLoS One* 10: e0140874.  
38  
39
- 40  
41 16. Harrell FE, Jr., Lee KL, Mark DB (1996) Multivariable prognostic models: issues in  
42 developing models, evaluating assumptions and adequacy, and measuring and reducing errors.  
43  
44  
45  
46  
47  
48  
49  
50  
51  
52  
53  
54  
55  
56  
57  
58  
59  
60
17. Peduzzi P, Concato J, Kemper E, Holford TR, Feinstein AR (1996) A simulation study of the  
number of events per variable in logistic regression analysis. *J Clin Epidemiol* 49: 1373-1379.

- 1  
2  
3 18. Collins GS, Reitsma JB, Altman DG, Moons KG (2015) Transparent Reporting of a  
4 multivariable prediction model for Individual Prognosis Or Diagnosis (TRIPOD). *Ann Intern Med*  
5 162: 735-736.  
6  
7  
8  
9  
10 19. Barker AL, Morello RT, Wolfe R, Brand CA, Haines TP, et al. (2016) 6-PACK programme to  
11 decrease fall injuries in acute hospitals: cluster randomised controlled trial. *BMJ* 352: h6781.  
12  
13  
14 20. SwissDRG (2015) Swiss Diagnosis Related Groups Version 5.0, Abrechnungsversion  
15 (2016/2016).  
16  
17  
18  
19 21. SwissDRG (2016) Swiss Diagnosis Related Groups Version 6.0, Abrechnungsversion  
20 (2017/2017).  
21  
22  
23  
24 22. Masnoon N, Shakib S, Kalisch-Ellett L, Caughey GE (2017) What is polypharmacy? A  
25 systematic review of definitions. *BMC Geriatr* 17: 230.  
26  
27  
28  
29 23. Moons KG, Harrell FE, Steyerberg EW (2002) Should scoring rules be based on odds ratios  
30 or regression coefficients? *J Clin Epidemiol* 55: 1054-1055.  
31  
32  
33  
34 24. Steyerberg EW, Harrell FE, Jr., Borsboom GJ, Eijkemans MJ, Vergouwe Y, et al. (2001)  
35 Internal validation of predictive models: efficiency of some procedures for logistic regression  
36 analysis. *J Clin Epidemiol* 54: 774-781.  
37  
38  
39  
40  
41 25. Rousson V, Zumbo T (2011) Decision curve analysis revisited: overall net benefit,  
42 relationships to ROC curve analysis, and application to case-control studies. *BMC Med Inform*  
43 *Decis Mak* 11: 45.  
44  
45  
46  
47  
48 26. Biller-Andorno N, Zeltner T (2015) Individual Responsibility and Community Solidarity--The  
49 Swiss Health Care System. *N Engl J Med* 373: 2193-2197.  
50  
51  
52  
53 27. Mabire C, Bula C, Morin D, Goulet C (2015) Nursing discharge planning for older medical  
54 inpatients in Switzerland: A cross-sectional study. *Geriatr Nurs* 36: 451-457.  
55  
56  
57  
58  
59  
60

1  
2  
3 28. Correia MI, Waitzberg DL (2003) The impact of malnutrition on morbidity, mortality, length of  
4 hospital stay and costs evaluated through a multivariate model analysis. Clin Nutr 22: 235-239.  
5  
6

7  
8 29. Norman K, Pichard C, Lochs H, Pirlich M (2008) Prognostic impact of disease-related  
9 malnutrition. Clin Nutr 27: 5-15.  
10  
11

12  
13  
14  
15 **Figure 1 caption**

16  
17 Flow chart. Derivation sample (derivation and internal validation cohort) and external validation sample  
18 (temporal validation cohort).  
19  
20  
21  
22  
23  
24  
25  
26  
27  
28  
29  
30  
31  
32  
33  
34  
35  
36  
37  
38  
39  
40  
41  
42  
43  
44  
45  
46  
47  
48  
49  
50  
51  
52  
53  
54  
55  
56  
57  
58  
59  
60

1  
2  
3  
4  
5  
6  
7  
8  
9  
10  
11  
12  
13  
14  
15  
16  
17  
18  
19  
20  
21  
22  
23  
24  
25  
26  
27  
28  
29  
30  
31  
32  
33  
34  
35  
36  
37  
38  
39  
40  
41  
42  
43  
44  
45  
46

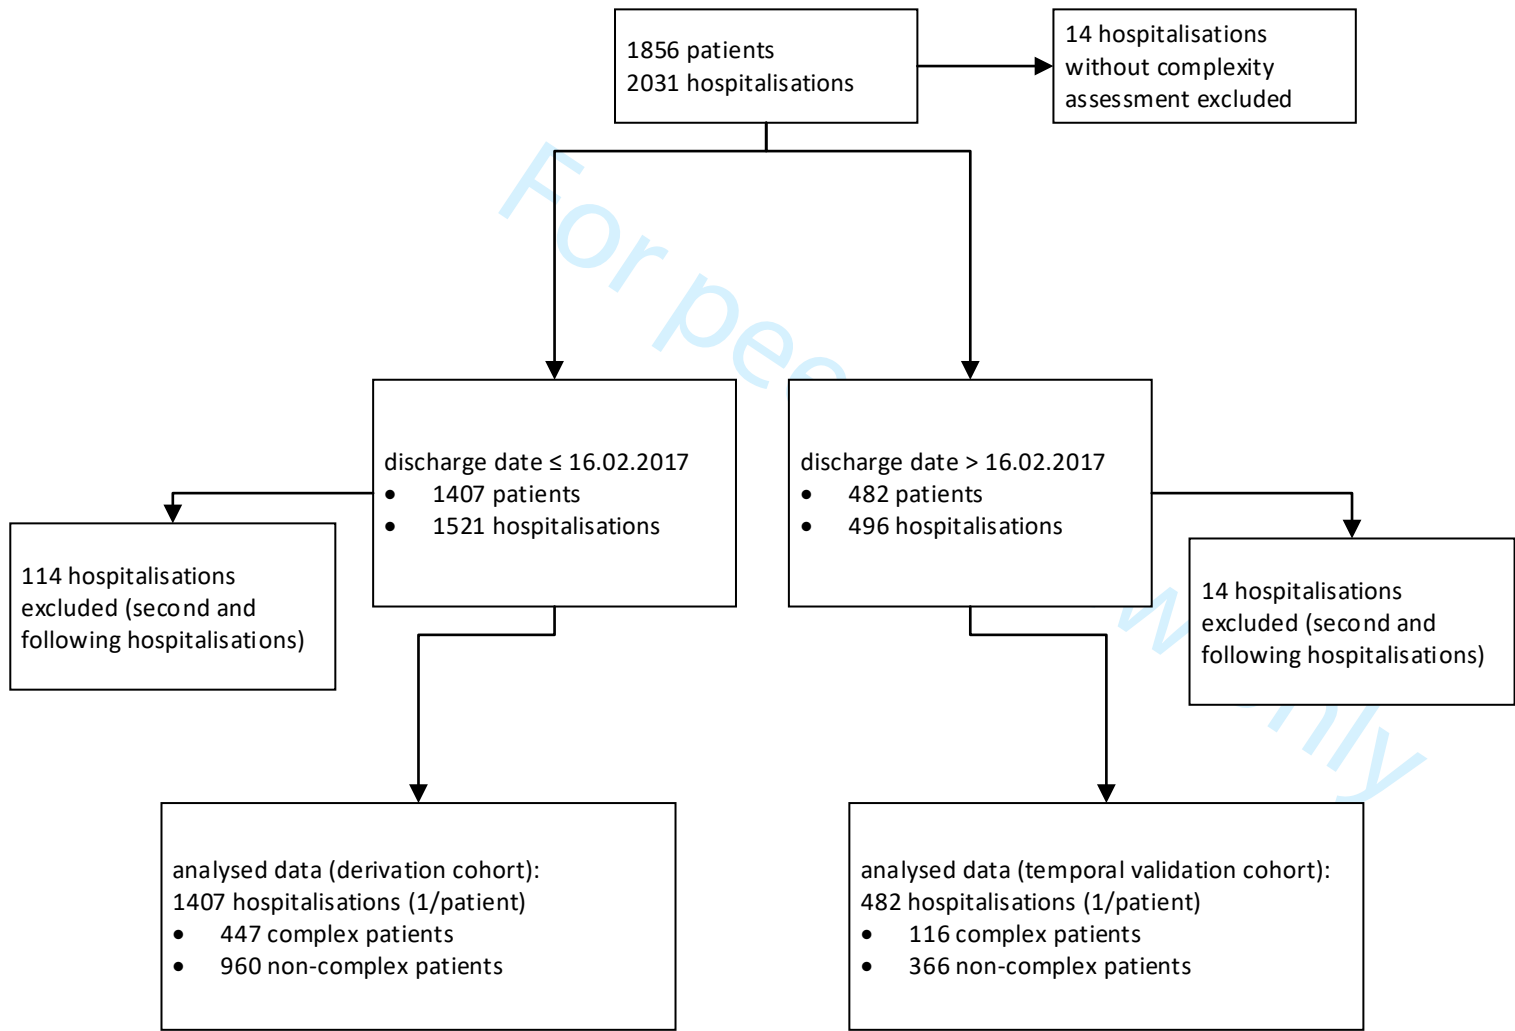



## Supplementary Material

**Table S1:** Baseline characteristics for derivation cohort stratified by complexity.

|                                                                                  | Overall<br>(N=1889)                   | Non-<br>complex<br>(N=1326) | Complex<br>(N=563) |
|----------------------------------------------------------------------------------|---------------------------------------|-----------------------------|--------------------|
|                                                                                  | n (%) or median [interquartile range] |                             |                    |
| <b>Age</b>                                                                       |                                       |                             |                    |
| ≥ 80 years                                                                       | 447 (32)                              | 337 (35)                    | 110 (25)           |
| 70 to 79 years                                                                   | 327 (23)                              | 218 (23)                    | 109 (24)           |
| 60 to 69 years                                                                   | 239 (17)                              | 152 (16)                    | 87 (19)            |
| < 60 years                                                                       | 391 (28)                              | 251 (26)                    | 140 (31)           |
| Missing                                                                          | 3 (0.2)                               | 2 (0.2)                     | 1 (0.2)            |
| <b>Gender</b>                                                                    |                                       |                             |                    |
| Male                                                                             | 748 (53)                              | 494 (51)                    | 254 (57)           |
| Female                                                                           | 656 (47)                              | 464 (48)                    | 192 (43)           |
| Missing                                                                          | 3 (0.2)                               | 2 (0.2)                     | 1 (0.2)            |
| <b>Living area<sup>1</sup></b>                                                   |                                       |                             |                    |
| Urban                                                                            | 460 (33)                              | 335 (35)                    | 125 (28)           |
| Rural                                                                            | 923 (66)                              | 606 (63)                    | 317 (71)           |
| Missing                                                                          | 24 (2)                                | 19 (2)                      | 5 (1)              |
| <b>Marital status</b>                                                            |                                       |                             |                    |
| Single                                                                           | 477 (34)                              | 306 (32)                    | 171 (38)           |
| Couple                                                                           | 673 (48)                              | 458 (48)                    | 215 (48)           |
| Widowed                                                                          | 252 (18)                              | 193 (20)                    | 59 (13)            |
| Missing                                                                          | 5 (0.4)                               | 3 (0.3)                     | 2 (0.4)            |
| <b>Hospitalization within last 12 months</b>                                     | 480 (34)                              | 317 (33)                    | 163 (36)           |
| <b>Medication<sup>2</sup></b>                                                    |                                       |                             |                    |
| Antineoplastic and immunomodulating agents at admission                          | 43 (3)                                | 20 (2)                      | 23 (5)             |
| Nervous system at admission                                                      | 1001 (71)                             | 666 (69)                    | 335 (75)           |
| Systemic hormonal preparations, excluding sex hormones and insulins at discharge | 253 (18)                              | 163 (17)                    | 90 (20)            |
| <b>High costs during hospitalization<sup>3</sup></b>                             |                                       |                             |                    |
| For imaging procedures                                                           | 367 (26)                              | 179 (19)                    | 188 (42)           |
| For laboratory analysis                                                          | 365 (26)                              | 147 (15)                    | 218 (49)           |
| <b>High nurse workload<sup>4</sup></b>                                           | 358 (25)                              | 146 (15)                    | 212 (47)           |
| <b>Charlson Comorbidity Index</b>                                                | 2 [0; 4]                              | 2 [0; 3]                    | 2.5 [1; 5]         |
| <b>Principal or concomitant diagnosis at discharge</b>                           |                                       |                             |                    |
| Cancer <sup>5</sup>                                                              | 175 (12)                              | 104 (11)                    | 71 (16)            |
| COPD <sup>6</sup>                                                                | 139 (10)                              | 91 (9)                      | 48 (11)            |
| Dementia <sup>7</sup>                                                            | 120 (8)                               | 89 (9)                      | 31 (7)             |
| Depression <sup>8</sup>                                                          | 148 (10)                              | 94 (10)                     | 54 (12)            |
| Heart failure <sup>9</sup>                                                       | 235 (17)                              | 143 (15)                    | 92 (21)            |

<sup>1</sup> Defined according to the Swiss Federal Statistical Office based on place of residence

<sup>2</sup> Group of drugs according to ATC classification

<sup>3</sup> Defined as costs of all imaging procedures or medication during hospital stay above 75<sup>th</sup> percentile

<sup>4</sup> Defined as sum of hours of all nursing work (incl. sitting guard) during hospital stay above 75<sup>th</sup> percentile

<sup>5</sup> ICD10-codes B21, C00 through C97, Z03.1

<sup>6</sup> ICD10-codes J44

<sup>7</sup> ICD10-codes F00 through F03, F05.0, F05.1

<sup>8</sup> ICD10-codes F20.4, F25.1, F31.3 F31.4, F31.5, F32, F33, F41.2, F92.0

<sup>9</sup> ICD10-codes I50

|                                                        |          |          |          |
|--------------------------------------------------------|----------|----------|----------|
| Pneumonia <sup>10</sup>                                | 186 (13) | 115 (12) | 71 (16)  |
| Sepsis <sup>11</sup>                                   | 162 (11) | 88 (9)   | 74 (17)  |
| Stroke <sup>12</sup>                                   | 72 (5)   | 50 (5)   | 22 (5)   |
| Substance abuse <sup>13</sup>                          | 154 (11) | 90 (9)   | 64 (14)  |
| Syncope <sup>14</sup>                                  | 68 (5)   | 55 (6)   | 13 (3)   |
| Malnutrition <sup>15</sup>                             | 190 (13) | 82 (8)   | 108 (24) |
| <b>Multimorbidity</b>                                  |          |          |          |
| Low (number of diagnoses ≤ 6)                          | 387 (27) | 322 (33) | 65 (14)  |
| Middle (number of diagnoses > 6 and <14) <sup>16</sup> | 642 (46) | 443 (46) | 199 (44) |
| High (number of diagnoses ≥ 14)                        | 375 (27) | 193 (20) | 182 (41) |
| <b>PCCL</b>                                            |          |          |          |
| No complication or comorbidity                         | 297 (21) | 239 (25) | 58 (13)  |
| Light complication or comorbidity                      | 22 (2)   | 15 (2)   | 7 (2)    |
| Moderate complication or comorbidity                   | 211 (15) | 161 (17) | 50 (11)  |
| Severe complication or comorbidity                     | 390 (28) | 289 (30) | 101 (23) |
| Very severe complication or comorbidity                | 484 (34) | 254 (26) | 230 (51) |
| Missing                                                | 3 (0.2)  | 2 (0.2)  | 1 (0.2)  |
| <b>Abnormal creatinine level<sup>17</sup></b>          |          |          |          |
| At admission and discharge                             | 278 (20) | 181 (19) | 97 (22)  |
| At admission only                                      | 128 (9)  | 72 (7)   | 56 (12)  |
| At discharge only                                      | 50 (4)   | 24 (2)   | 26 (6)   |
| Missing                                                | 275 (19) | 229 (24) | 46 (10)  |
| <b>Leukocytosis<sup>18</sup></b>                       |          |          |          |
| At admission and discharge                             | 15 (1)   | 6 (0.6)  | 9 (2)    |
| At admission only                                      | 60 (4)   | 35 (4)   | 25 (6)   |
| At discharge only                                      | 11 (0.8) | 3 (0.3)  | 8 (2)    |
| Missing                                                | 260 (18) | 223 (23) | 37 (8)   |
| <b>Patient destination</b>                             |          |          |          |
| Death                                                  | 105 (7)  | 73 (8)   | 32 (7)   |
| Home                                                   | 875 (62) | 621 (65) | 254 (57) |
| Hospital                                               | 141 (10) | 85 (9)   | 56 (12)  |
| Nursing home                                           | 109 (8)  | 79 (8)   | 30 (7)   |
| Rehabilitation                                         | 138 (10) | 79 (8)   | 59 (13)  |
| Others and missing                                     | 39 (3)   | 23 (2)   | 16 (4)   |

**Table S2:** Baseline characteristics for all patients in the validation cohort stratified by complexity.

<sup>10</sup> ICD10-codes A48.1, B01.2, B05.2, J10.0, J11.0, J12 through J18, J68.0, J69, J85.1, O74.0, U69.00

<sup>11</sup> ICD10-codes A02.1, A20.7, A22.7, A26.7, A32.7, A39.2, A39.3, A39.4, A40, A41, A42.7, B37.7

<sup>12</sup> ICD10-codes I63

<sup>13</sup> ICD10-codes F10 through F19, F53, F66.8, F66.9

<sup>14</sup> ICD10-codes R55

<sup>15</sup> ICD10-codes E40 through E46

<sup>16</sup> Between 25<sup>th</sup> and 75<sup>th</sup> percentile

<sup>17</sup> Defined as creatinine ≥100 µmol/l

<sup>18</sup> Defined as leukocyte count ≥20 G/l

|                                                                                  | Overall<br>(N=1889)                   | Non-<br>complex<br>(N=1326) | Complex<br>(N=563) |
|----------------------------------------------------------------------------------|---------------------------------------|-----------------------------|--------------------|
|                                                                                  | n (%) or median [interquartile range] |                             |                    |
| <b>Age</b>                                                                       |                                       |                             |                    |
| ≥ 80 years                                                                       | 132 (27)                              | 105 (29)                    | 27 (23)            |
| 70 to 79 years                                                                   | 110 (23)                              | 86 (23)                     | 24 (21)            |
| 60 to 69 years                                                                   | 83 (17)                               | 59 (16)                     | 24 (21)            |
| < 60 years                                                                       | 146 (30)                              | 112 (31)                    | 34 (29)            |
| Missing                                                                          | 11 (2)                                | 4 (1)                       | 7 (6)              |
| <b>Gender</b>                                                                    |                                       |                             |                    |
| Male                                                                             | 254 (53)                              | 199 (54)                    | 55 (47)            |
| Female                                                                           | 217 (45)                              | 163 (44)                    | 54 (47)            |
| Missing                                                                          | 11 (2)                                | 4 (1)                       | 7 (6)              |
| <b>Living area<sup>1</sup></b>                                                   |                                       |                             |                    |
| Urban                                                                            | 151 (31)                              | 118 (32)                    | 33 (28)            |
| Rural                                                                            | 315 (65)                              | 242 (66)                    | 73 (63)            |
| Missing                                                                          | 16 (3)                                | 6 (2)                       | 10 (9)             |
| <b>Marital status</b>                                                            |                                       |                             |                    |
| Single                                                                           | 159 (33)                              | 123 (34)                    | 36 (31)            |
| Couple                                                                           | 243 (50)                              | 183 (50)                    | 60 (52)            |
| Widowed                                                                          | 79 (16)                               | 59 (16)                     | 20 (17)            |
| Missing                                                                          | 1 (0.2)                               | 1 (0.3)                     | 0 (0)              |
| <b>Hospitalization within last 12 months</b>                                     | 193 (40)                              | 135 (37)                    | 58 (50)            |
| <b>Medication<sup>2</sup></b>                                                    |                                       |                             |                    |
| Antineoplastic and immunomodulating agents at admission                          | 27 (6)                                | 18 (5)                      | 9 (8)              |
| Nervous system at admission                                                      | 339 (70)                              | 252 (69)                    | 87 (75)            |
| Systemic hormonal preparations, excluding sex hormones and insulins at discharge | 105 (22)                              | 73 (20)                     | 32 (28)            |
| <b>High costs during hospitalization<sup>3</sup></b>                             |                                       |                             |                    |
| For imaging procedures                                                           | 118 (24)                              | 76 (21)                     | 42 (36)            |
| For laboratory analysis                                                          | 117 (24)                              | 56 (15)                     | 61 (53)            |
| <b>High nurse workload<sup>4</sup></b>                                           | 117 (24)                              | 57 (15.6)                   | 60 (52)            |
| <b>Charlson Comorbidity Index</b>                                                | 2 [0; 4]                              | 2.00 [0; 3]                 | 3 [1; 5]           |
| <b>Principal or concomitant diagnosis at discharge</b>                           |                                       |                             |                    |
| Cancer <sup>5</sup>                                                              | 50 (10)                               | 50 (10)                     | 50 (10)            |
| COPD <sup>6</sup>                                                                | 32 (9)                                | 32 (8)                      | 32 (9)             |
| Dementia <sup>7</sup>                                                            | 18 (15)                               | 18 (15)                     | 18 (15)            |
| Depression <sup>8</sup>                                                          | 47 (10)                               | 47 (10)                     | 47 (10)            |
| Heart failure <sup>9</sup>                                                       | 33 (9)                                | 33 (9)                      | 33 (9)             |
| Pneumonia <sup>10</sup>                                                          | 14 (12)                               | 14 (12)                     | 14 (12)            |
| Sepsis <sup>11</sup>                                                             | 43 (9)                                | 43 (9)                      | 43 (9)             |

<sup>1</sup> Defined according to the Swiss Federal Statistical Office based on place of residence

<sup>2</sup> Group of drugs according to ATC classification

<sup>3</sup> Defined as costs of all imaging procedures or medication during hospital stay above 75<sup>th</sup> percentile

<sup>4</sup> Defined as sum of hours of all nursing work (incl. sitting guard) during hospital stay above 75<sup>th</sup> percentile

<sup>5</sup> ICD10-codes B21, C00 through C97, Z03.1

<sup>6</sup> ICD10-codes J44

<sup>7</sup> ICD10-codes F00 through F03, F05.0, F05.1

<sup>8</sup> ICD10-codes F20.4, F25.1, F31.3 F31.4, F31.5, F32, F33, F41.2, F92.0

<sup>9</sup> ICD10-codes I50

<sup>10</sup> ICD10-codes A48.1, B01.2, B05.2, J10.0, J11.0, J12 through J18, J68.0, J69, J85.1, O74.0, U69.00

<sup>11</sup> ICD10-codes A02.1, A20.7, A22.7, A26.7, A32.7, A39.2, A39.3, A39.4, A40, A41, A42.7, B37.7

|                                                        |           |          |          |
|--------------------------------------------------------|-----------|----------|----------|
| Stroke <sup>12</sup>                                   | 36 (10)   | 36 (9)   | 36 (10)  |
| Substance abuse <sup>13</sup>                          | 7 (6)     | 7 (6)    | 7 (6)    |
| Syncope <sup>14</sup>                                  | 61 (13)   | 61 (13)  | 61 (13)  |
| Malnutrition <sup>15</sup>                             | 46 (13)   | 46 (13)  | 46 (13)  |
| <b>Multimorbidity</b>                                  |           |          |          |
| Low (number of diagnoses ≤ 6)                          | 123 (25)  | 113 (31) | 10 (9)   |
| Middle (number of diagnoses > 6 and <14) <sup>16</sup> | 199 (41)  | 160 (44) | 39 (34)  |
| High (number of diagnoses ≥ 14)                        | 149 (31)  | 89 (24)  | 60 (52)  |
| <b>PCCL</b>                                            |           |          |          |
| No complication or comorbidity                         | 83 (1)    | 73 (20)  | 10 (9)   |
| Light complication or comorbidity                      | 7 (1)     | 6 (2)    | 1 (0.9)  |
| Moderate complication or comorbidity                   | 81 (17)   | 72 (20)  | 9 (8)    |
| Severe complication or comorbidity                     | 143 (30)  | 120 (33) | 23 (20)  |
| Very severe complication or comorbidity                | 157 (33)  | 91 (24)  | 66 (57)  |
| Missing                                                | 11 (2)    | 4 (1)    | 7 (6)    |
| <b>Abnormal creatinine level<sup>17</sup></b>          |           |          |          |
| At admission and discharge                             | 90 (19)   | 60 (16)  | 30 (26)  |
| At admission only                                      | 54 (11)   | 34 (9)   | 20 (17)  |
| At discharge only                                      | 13 (2.7)  | 10 (3)   | 3 (3)    |
| Missing                                                | 89 (18)   | 82 (22)  | 7 (6)    |
| <b>Leukocytosis<sup>18</sup></b>                       |           |          |          |
| At admission and discharge                             | 4 (0.8)   | 2 (0)    | 2 (2)    |
| At admission only                                      | 17 (3)    | 12 (3)   | 5 (4)    |
| At discharge only                                      | 2 (0.4)   | 2 (0.5)  | 0 (0)    |
| Missing                                                | 91 (19)   | 83 (23)  | 8 (7)    |
| <b>Patient destination</b>                             |           |          |          |
| Death                                                  | 134 (7)   | 91 (7)   | 43 (8)   |
| Home                                                   | 1178 (62) | 873 (66) | 305 (54) |
| Hospital                                               | 191 (10)  | 119 (9)  | 72 (13)  |
| Nursing home                                           | 155 (8)   | 108 (8)  | 47 (8)   |
| Rehabilitation                                         | 171 (9)   | 101 (8)  | 70 (12)  |
| Others and missing                                     | 60 (3)    | 34 (3)   | 26 (5)   |

<sup>12</sup> ICD10-codes I63

<sup>13</sup> ICD10-codes F10 through F19, F53, F66.8, F66.9

<sup>14</sup> ICD10-codes R55

<sup>15</sup> ICD10-codes E40 through E46

<sup>16</sup> Between 25<sup>th</sup> and 75<sup>th</sup> percentile

<sup>17</sup> Defined as creatinine ≥100 µmol/l

<sup>18</sup> Defined as leukocyte count ≥20 G/l

Supplementary figure S1. Decision curve analysis. A, derivation dataset. B, validation dataset.

CCI, Charlson comorbidity index.

A)

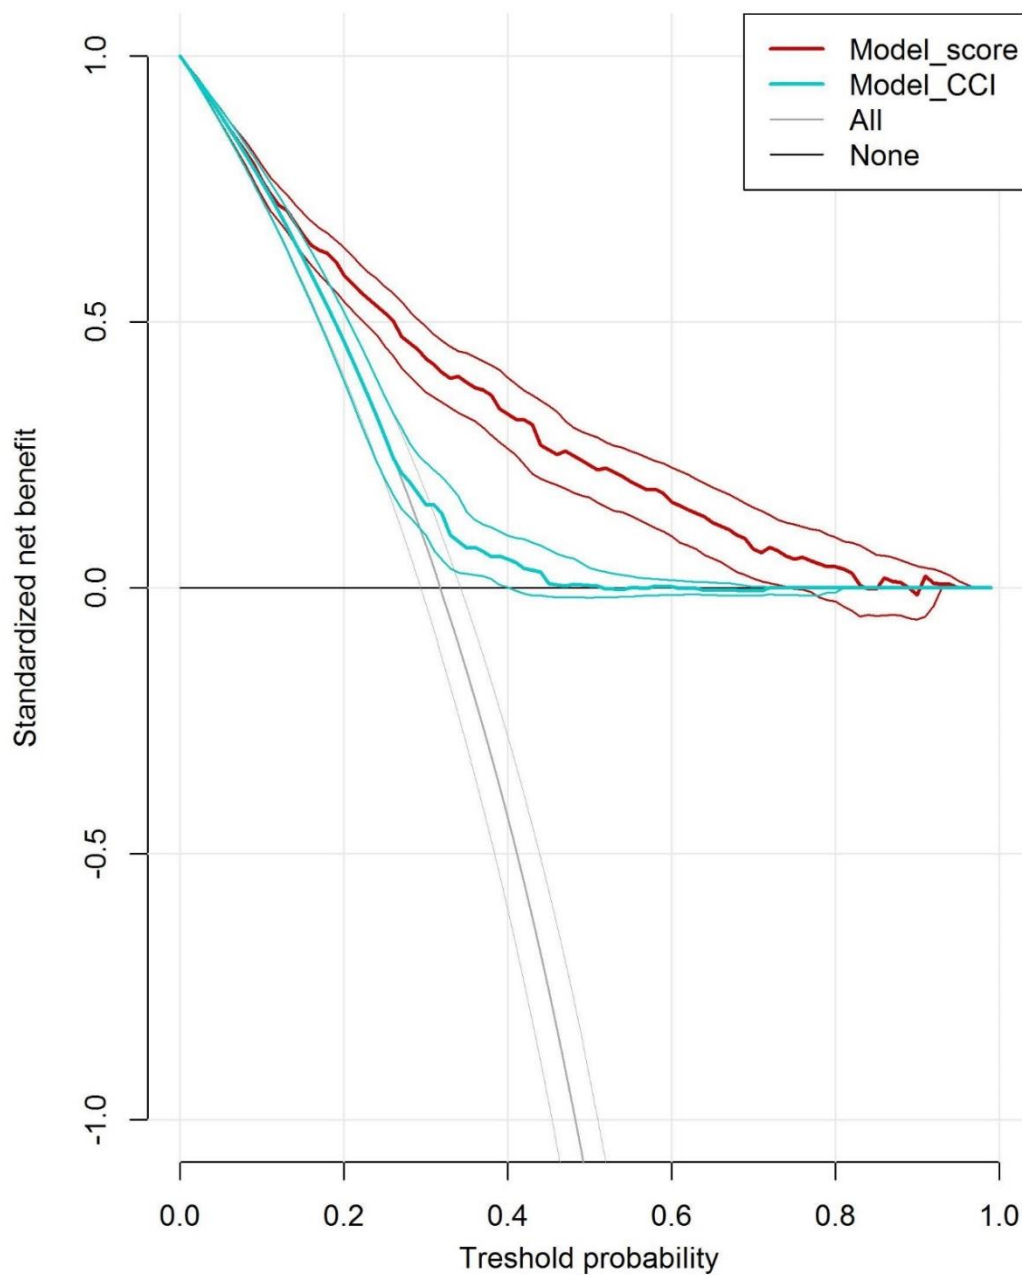

B)

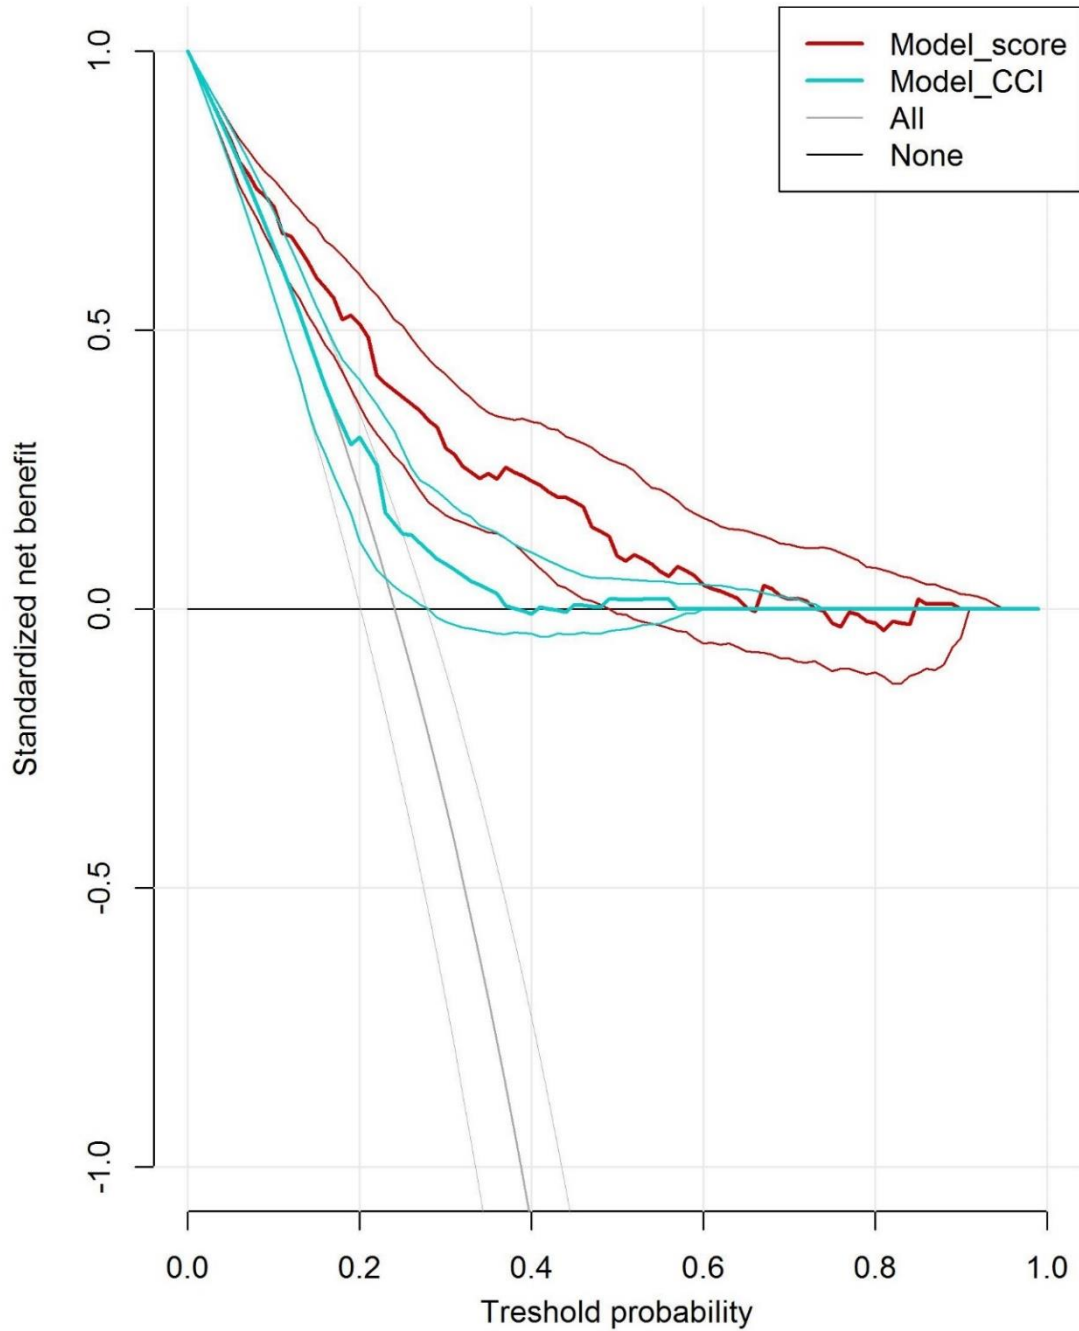

1  
2  
3 **Supplementary figure S2.** A, PCA score, derivation dataset. B, PCA score, validation dataset.  
4  
5 C, PCCL, derivation dataset. D, PCCL, validation dataset. E, CCI, derivation dataset. F, CCI,  
6  
7 validation dataset.  
8  
9  
10  
11  
12  
13

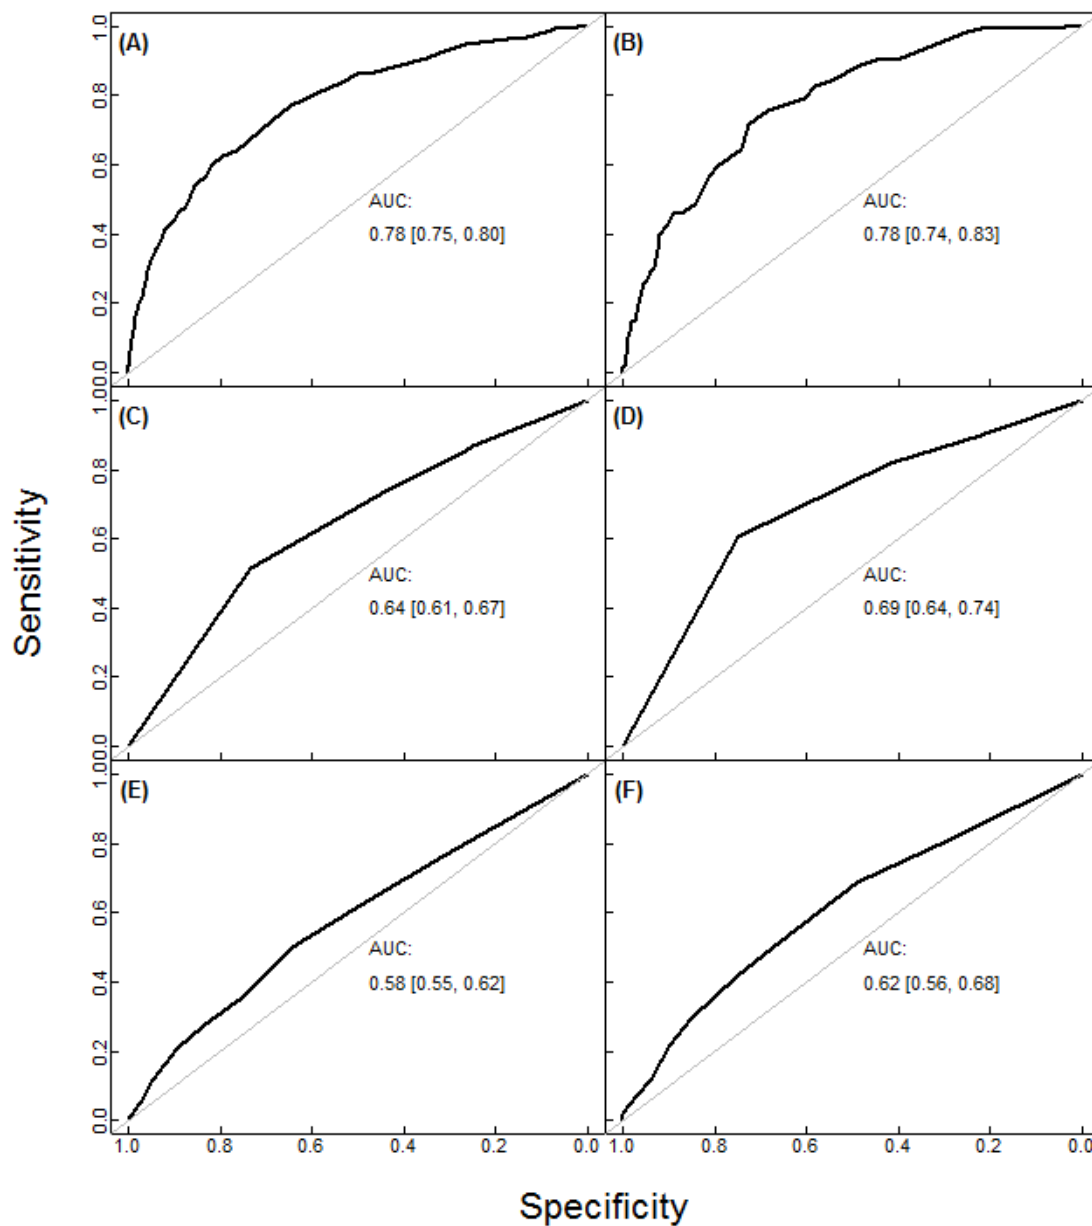

# Reporting checklist for prediction model development and validation study.

Based on the TRIPOD guidelines.

## Instructions to authors

Complete this checklist by entering the page numbers from your manuscript where readers will find each of the items listed below.

Your article may not currently address all the items on the checklist. Please modify your text to include the missing information. If you are certain that an item does not apply, please write "n/a" and provide a short explanation.

Upload your completed checklist as an extra file when you submit to a journal.

In your methods section, say that you used the TRIPOD reporting guidelines, and cite them as:

Collins GS, Reitsma JB, Altman DG, Moons KG. Transparent reporting of a multivariable prediction model for individual prognosis or diagnosis (TRIPOD): The TRIPOD statement.

|              | Reporting Item                                                                                                                                                    | Page Number |
|--------------|-------------------------------------------------------------------------------------------------------------------------------------------------------------------|-------------|
| <b>Title</b> |                                                                                                                                                                   |             |
|              | <a href="#">#1</a> Identify the study as developing and / or validating a multivariable prediction model, the target population, and the outcome to be predicted. | 1           |

## Abstract



|    |                     |                                                                 |     |
|----|---------------------|-----------------------------------------------------------------|-----|
| 1  |                     |                                                                 |     |
| 2  |                     | <a href="#">#2</a>                                              | 3   |
| 3  |                     |                                                                 |     |
| 4  |                     | Provide a summary of objectives, study design, setting,         |     |
| 5  |                     | participants, sample size, predictors, outcome, statistical     |     |
| 6  |                     | analysis, results, and conclusions.                             |     |
| 7  |                     |                                                                 |     |
| 8  |                     |                                                                 |     |
| 9  | <b>Introduction</b> |                                                                 |     |
| 10 |                     |                                                                 |     |
| 11 |                     |                                                                 |     |
| 12 |                     | <a href="#">#3a</a>                                             | 5   |
| 13 |                     | Explain the medical context (including whether diagnostic or    |     |
| 14 |                     | prognostic) and rationale for developing or validating the      |     |
| 15 |                     | multivariable prediction model, including references to         |     |
| 16 |                     | existing models.                                                |     |
| 17 |                     |                                                                 |     |
| 18 |                     |                                                                 |     |
| 19 |                     |                                                                 |     |
| 20 |                     |                                                                 |     |
| 21 |                     |                                                                 |     |
| 22 |                     | <a href="#">#3b</a>                                             | 5   |
| 23 |                     | Specify the objectives, including whether the study describes   |     |
| 24 |                     | the development or validation of the model or both.             |     |
| 25 |                     |                                                                 |     |
| 26 |                     |                                                                 |     |
| 27 | <b>Methods</b>      |                                                                 |     |
| 28 |                     |                                                                 |     |
| 29 |                     |                                                                 |     |
| 30 | Source of data      | <a href="#">#4a</a>                                             | 6   |
| 31 |                     | Describe the study design or source of data (e.g.,              |     |
| 32 |                     | randomized trial, cohort, or registry data), separately for the |     |
| 33 |                     | development and validation data sets, if applicable.            |     |
| 34 |                     |                                                                 |     |
| 35 |                     |                                                                 |     |
| 36 |                     |                                                                 |     |
| 37 |                     |                                                                 |     |
| 38 | Source of data      | <a href="#">#4b</a>                                             | 6   |
| 39 |                     | Specify the key study dates, including start of accrual; end of |     |
| 40 |                     | accrual; and, if applicable, end of follow-up.                  |     |
| 41 |                     |                                                                 |     |
| 42 |                     |                                                                 |     |
| 43 | Participants        | <a href="#">#5a</a>                                             | 6   |
| 44 |                     | Specify key elements of the study setting (e.g., primary care,  |     |
| 45 |                     | secondary care, general population) including number and        |     |
| 46 |                     | location of centres.                                            |     |
| 47 |                     |                                                                 |     |
| 48 |                     |                                                                 |     |
| 49 |                     |                                                                 |     |
| 50 |                     |                                                                 |     |
| 51 | Participants        | <a href="#">#5b</a>                                             | 6   |
| 52 |                     | Describe eligibility criteria for participants.                 |     |
| 53 |                     |                                                                 |     |
| 54 | Participants        | <a href="#">#5c</a>                                             | n/a |
| 55 |                     | Give details of treatments received, if relevant                |     |
| 56 |                     |                                                                 |     |
| 57 |                     |                                                                 |     |
| 58 |                     |                                                                 |     |
| 59 |                     |                                                                 |     |
| 60 |                     |                                                                 |     |

|    |                  |                      |                                                                                                                                                                         |     |
|----|------------------|----------------------|-------------------------------------------------------------------------------------------------------------------------------------------------------------------------|-----|
| 1  | Outcome          | <a href="#">#6a</a>  | Clearly define the outcome that is predicted by the prediction model, including how and when assessed.                                                                  | 6   |
| 2  |                  |                      |                                                                                                                                                                         |     |
| 3  |                  |                      |                                                                                                                                                                         |     |
| 4  |                  |                      |                                                                                                                                                                         |     |
| 5  |                  |                      |                                                                                                                                                                         |     |
| 6  | Outcome          | <a href="#">#6b</a>  | Report any actions to blind assessment of the outcome to be predicted.                                                                                                  | n/a |
| 7  |                  |                      |                                                                                                                                                                         |     |
| 8  |                  |                      |                                                                                                                                                                         |     |
| 9  |                  |                      |                                                                                                                                                                         |     |
| 10 |                  |                      |                                                                                                                                                                         |     |
| 11 | Predictors       | <a href="#">#7a</a>  | Clearly define all predictors used in developing or validating the multivariable prediction model, including how and when they were measured                            | 7   |
| 12 |                  |                      |                                                                                                                                                                         |     |
| 13 |                  |                      |                                                                                                                                                                         |     |
| 14 |                  |                      |                                                                                                                                                                         |     |
| 15 |                  |                      |                                                                                                                                                                         |     |
| 16 |                  |                      |                                                                                                                                                                         |     |
| 17 |                  |                      |                                                                                                                                                                         |     |
| 18 |                  |                      |                                                                                                                                                                         |     |
| 19 | Predictors       | <a href="#">#7b</a>  | Report any actions to blind assessment of predictors for the outcome and other predictors.                                                                              | n/a |
| 20 |                  |                      |                                                                                                                                                                         |     |
| 21 |                  |                      |                                                                                                                                                                         |     |
| 22 |                  |                      |                                                                                                                                                                         |     |
| 23 |                  |                      |                                                                                                                                                                         |     |
| 24 |                  |                      |                                                                                                                                                                         |     |
| 25 | Sample size      | <a href="#">#8</a>   | Explain how the study size was arrived at.                                                                                                                              | 6   |
| 26 |                  |                      |                                                                                                                                                                         |     |
| 27 |                  |                      |                                                                                                                                                                         |     |
| 28 | Missing data     | <a href="#">#9</a>   | Describe how missing data were handled (e.g., complete-case analysis, single imputation, multiple imputation) with details of any imputation method.                    | 8-9 |
| 29 |                  |                      |                                                                                                                                                                         |     |
| 30 |                  |                      |                                                                                                                                                                         |     |
| 31 |                  |                      |                                                                                                                                                                         |     |
| 32 |                  |                      |                                                                                                                                                                         |     |
| 33 |                  |                      |                                                                                                                                                                         |     |
| 34 |                  |                      |                                                                                                                                                                         |     |
| 35 | Statistical      | <a href="#">#10a</a> | If you are developing a prediction model describe how predictors were handled in the analyses.                                                                          | 8-9 |
| 36 |                  |                      |                                                                                                                                                                         |     |
| 37 | analysis methods |                      |                                                                                                                                                                         |     |
| 38 |                  |                      |                                                                                                                                                                         |     |
| 39 |                  |                      |                                                                                                                                                                         |     |
| 40 |                  |                      |                                                                                                                                                                         |     |
| 41 | Statistical      | <a href="#">#10b</a> | If you are developing a prediction model, specify type of model, all model-building procedures (including any predictor selection), and method for internal validation. | 8-9 |
| 42 |                  |                      |                                                                                                                                                                         |     |
| 43 | analysis methods |                      |                                                                                                                                                                         |     |
| 44 |                  |                      |                                                                                                                                                                         |     |
| 45 |                  |                      |                                                                                                                                                                         |     |
| 46 |                  |                      |                                                                                                                                                                         |     |
| 47 |                  |                      |                                                                                                                                                                         |     |
| 48 | Statistical      | <a href="#">#10c</a> | If you are validating a prediction model, describe how the predictions were calculated.                                                                                 | 8-9 |
| 49 |                  |                      |                                                                                                                                                                         |     |
| 50 | analysis methods |                      |                                                                                                                                                                         |     |
| 51 |                  |                      |                                                                                                                                                                         |     |
| 52 |                  |                      |                                                                                                                                                                         |     |
| 53 |                  |                      |                                                                                                                                                                         |     |
| 54 | Statistical      | <a href="#">#10d</a> | Specify all measures used to assess model performance and, if relevant, to compare multiple models.                                                                     | 8-9 |
| 55 |                  |                      |                                                                                                                                                                         |     |
| 56 | analysis methods |                      |                                                                                                                                                                         |     |
| 57 |                  |                      |                                                                                                                                                                         |     |
| 58 |                  |                      |                                                                                                                                                                         |     |
| 59 |                  |                      |                                                                                                                                                                         |     |
| 60 |                  |                      |                                                                                                                                                                         |     |

|    |                  |                      |                                                                 |        |
|----|------------------|----------------------|-----------------------------------------------------------------|--------|
| 1  | Statistical      | <a href="#">#10e</a> | If you are validating a prediction model, describe any model    | 8-9    |
| 2  |                  |                      |                                                                 |        |
| 3  | analysis methods |                      | updating (e.g., recalibration) arising from the validation, if  |        |
| 4  |                  |                      | done                                                            |        |
| 5  |                  |                      |                                                                 |        |
| 6  |                  |                      |                                                                 |        |
| 7  |                  |                      |                                                                 |        |
| 8  |                  |                      |                                                                 |        |
| 9  | Risk groups      | <a href="#">#11</a>  | Provide details on how risk groups were created, if done.       | n/a    |
| 10 |                  |                      |                                                                 |        |
| 11 |                  |                      |                                                                 |        |
| 12 | Development vs.  | <a href="#">#12</a>  | For validation, identify any differences from the development   | 8-9    |
| 13 | validation       |                      | data in setting, eligibility criteria, outcome, and predictors. |        |
| 14 |                  |                      |                                                                 |        |
| 15 |                  |                      |                                                                 |        |
| 16 |                  |                      |                                                                 |        |
| 17 | <b>Results</b>   |                      |                                                                 |        |
| 18 |                  |                      |                                                                 |        |
| 19 |                  |                      |                                                                 |        |
| 20 | Participants     | <a href="#">#13a</a> | Describe the flow of participants through the study, including  | 9 + 24 |
| 21 |                  |                      | the number of participants with and without the outcome         |        |
| 22 |                  |                      | and, if applicable, a summary of the follow-up time. A          |        |
| 23 |                  |                      | diagram may be helpful.                                         |        |
| 24 |                  |                      |                                                                 |        |
| 25 |                  |                      |                                                                 |        |
| 26 |                  |                      |                                                                 |        |
| 27 |                  |                      |                                                                 |        |
| 28 |                  |                      |                                                                 |        |
| 29 |                  |                      |                                                                 |        |
| 30 | Participants     | <a href="#">#13b</a> | Describe the characteristics of the participants (basic         | 9 + 18 |
| 31 |                  |                      | demographics, clinical features, available predictors),         |        |
| 32 |                  |                      | including the number of participants with missing data for      |        |
| 33 |                  |                      | predictors and outcome.                                         |        |
| 34 |                  |                      |                                                                 |        |
| 35 |                  |                      |                                                                 |        |
| 36 |                  |                      |                                                                 |        |
| 37 |                  |                      |                                                                 |        |
| 38 |                  |                      |                                                                 |        |
| 39 |                  |                      |                                                                 |        |
| 40 | Participants     | <a href="#">#13c</a> | For validation, show a comparison with the development          | 9 + 18 |
| 41 |                  |                      | data of the distribution of important variables (demographics,  |        |
| 42 |                  |                      | predictors and outcome).                                        |        |
| 43 |                  |                      |                                                                 |        |
| 44 |                  |                      |                                                                 |        |
| 45 |                  |                      |                                                                 |        |
| 46 |                  |                      |                                                                 |        |
| 47 |                  |                      |                                                                 |        |
| 48 | Model            | <a href="#">#14a</a> | If developing a model, specify the number of participants       | 9      |
| 49 |                  |                      | and outcome events in each analysis.                            |        |
| 50 | development      |                      |                                                                 |        |
| 51 |                  |                      |                                                                 |        |
| 52 |                  |                      |                                                                 |        |
| 53 | Model            | <a href="#">#14b</a> | If developing a model, report the unadjusted association, if    | 9      |
| 54 |                  |                      | calculated between each candidate predictor and outcome.        |        |
| 55 | development      |                      |                                                                 |        |
| 56 |                  |                      |                                                                 |        |
| 57 |                  |                      |                                                                 |        |
| 58 |                  |                      |                                                                 |        |
| 59 |                  |                      |                                                                 |        |
| 60 |                  |                      |                                                                 |        |

|    |                   |                      |                                                                  |         |
|----|-------------------|----------------------|------------------------------------------------------------------|---------|
| 1  | Model             | <a href="#">#15a</a> | If developing a model, present the full prediction model to      | 9 + 21  |
| 2  |                   |                      |                                                                  |         |
| 3  | specification     |                      | allow predictions for individuals (i.e., all regression          |         |
| 4  |                   |                      | coefficients, and model intercept or baseline survival at a      |         |
| 5  |                   |                      | given time point).                                               |         |
| 6  |                   |                      |                                                                  |         |
| 7  |                   |                      |                                                                  |         |
| 8  |                   |                      |                                                                  |         |
| 9  |                   |                      |                                                                  |         |
| 10 |                   |                      |                                                                  |         |
| 11 | Model             | <a href="#">#15b</a> | If developing a prediction model, explain how to the use it.     | 10 + 21 |
| 12 |                   |                      |                                                                  |         |
| 13 | specification     |                      |                                                                  |         |
| 14 |                   |                      |                                                                  |         |
| 15 |                   |                      |                                                                  |         |
| 16 | Model             | <a href="#">#16</a>  | Report performance measures (with CIs) for the prediction        | 10, 11, |
| 17 |                   |                      | model.                                                           | 23      |
| 18 | performance       |                      |                                                                  |         |
| 19 |                   |                      |                                                                  |         |
| 20 |                   |                      |                                                                  |         |
| 21 |                   |                      |                                                                  |         |
| 22 | Model-updating    | <a href="#">#17</a>  | If validating a model, report the results from any model         | 10-11   |
| 23 |                   |                      | updating, if done (i.e., model specification, model              |         |
| 24 |                   |                      | performance).                                                    |         |
| 25 |                   |                      |                                                                  |         |
| 26 |                   |                      |                                                                  |         |
| 27 |                   |                      |                                                                  |         |
| 28 |                   |                      |                                                                  |         |
| 29 | <b>Discussion</b> |                      |                                                                  |         |
| 30 |                   |                      |                                                                  |         |
| 31 |                   |                      |                                                                  |         |
| 32 | Limitations       | <a href="#">#18</a>  | Discuss any limitations of the study (such as                    | 14      |
| 33 |                   |                      | nonrepresentative sample, few events per predictor, missing      |         |
| 34 |                   |                      | data).                                                           |         |
| 35 |                   |                      |                                                                  |         |
| 36 |                   |                      |                                                                  |         |
| 37 |                   |                      |                                                                  |         |
| 38 |                   |                      |                                                                  |         |
| 39 |                   |                      |                                                                  |         |
| 40 | Interpretation    | <a href="#">#19a</a> | For validation, discuss the results with reference to            | 11-14   |
| 41 |                   |                      | performance in the development data, and any other               |         |
| 42 |                   |                      | validation data                                                  |         |
| 43 |                   |                      |                                                                  |         |
| 44 |                   |                      |                                                                  |         |
| 45 |                   |                      |                                                                  |         |
| 46 |                   |                      |                                                                  |         |
| 47 | Interpretation    | <a href="#">#19b</a> | Give an overall interpretation of the results, considering       | 11-14   |
| 48 |                   |                      | objectives, limitations, results from similar studies, and other |         |
| 49 |                   |                      | relevant evidence.                                               |         |
| 50 |                   |                      |                                                                  |         |
| 51 |                   |                      |                                                                  |         |
| 52 |                   |                      |                                                                  |         |
| 53 |                   |                      |                                                                  |         |
| 54 |                   |                      |                                                                  |         |
| 55 | Implications      | <a href="#">#20</a>  | Discuss the potential clinical use of the model and              | 14      |
| 56 |                   |                      | implications for future research                                 |         |
| 57 |                   |                      |                                                                  |         |
| 58 |                   |                      |                                                                  |         |
| 59 |                   |                      |                                                                  |         |
| 60 |                   |                      |                                                                  |         |

## Other information

- 1  
2  
3  
4  
5  
6  
7  
8  
9  
10  
11  
12  
13  
14  
15  
16  
17  
18  
19  
20  
21  
22  
23  
24  
25  
26  
27  
28  
29  
30  
31  
32  
33  
34  
35  
36  
37  
38  
39  
40  
41  
42  
43  
44  
45  
46  
47  
48  
49  
50  
51  
52  
53  
54  
55  
56  
57  
58  
59  
60
- |                           |                     |                                                                                                                               |    |
|---------------------------|---------------------|-------------------------------------------------------------------------------------------------------------------------------|----|
| Supplementary information | <a href="#">#21</a> | Provide information about the availability of supplementary resources, such as study protocol, Web calculator, and data sets. | 25 |
| Funding                   | <a href="#">#22</a> | Give the source of funding and the role of the funders for the present study.                                                 | 2  |

The TRIPOD checklist is distributed under the terms of the Creative Commons Attribution License CC-BY. This checklist was completed on 30. May 2020 using <https://www.goodreports.org/>, a tool made by the [EQUATOR Network](#) in collaboration with [Penelope.ai](#)

# BMJ Open

## Development and validation of a score to assess complexity of general internal medicine patients at hospital discharge: a prospective cohort study

|                                 |                                                                                                                                                                                                                                                                                                                                                                                                                                                                                                                                                                                                                       |
|---------------------------------|-----------------------------------------------------------------------------------------------------------------------------------------------------------------------------------------------------------------------------------------------------------------------------------------------------------------------------------------------------------------------------------------------------------------------------------------------------------------------------------------------------------------------------------------------------------------------------------------------------------------------|
| Journal:                        | <i>BMJ Open</i>                                                                                                                                                                                                                                                                                                                                                                                                                                                                                                                                                                                                       |
| Manuscript ID                   | bmjopen-2020-041205.R2                                                                                                                                                                                                                                                                                                                                                                                                                                                                                                                                                                                                |
| Article Type:                   | Original research                                                                                                                                                                                                                                                                                                                                                                                                                                                                                                                                                                                                     |
| Date Submitted by the Author:   | 16-Apr-2021                                                                                                                                                                                                                                                                                                                                                                                                                                                                                                                                                                                                           |
| Complete List of Authors:       | Liechti, Fabian; Inselspital University Hospital Bern, Department of General Internal Medicine<br>Beck, Thomas; Inselspital University Hospital Bern, Department of General Internal Medicine<br>Ruetsche, Adrian; Direction of Technology and Innovation, University Hospital Bern, Switzerland<br>Roumet, Marie; University of Bern, CTU Bern<br>Limacher, Andreas; University of Bern, CTU Bern<br>Tritschler, Tobias ; Inselspital University Hospital Bern,<br>Donzé, Jacques; Inselspital University Hospital Bern, Department of General Internal Medicine; Neuchâtel Hospital Network, Department of medicine |
| <b>Primary Subject Heading</b>: | Health services research                                                                                                                                                                                                                                                                                                                                                                                                                                                                                                                                                                                              |
| Secondary Subject Heading:      | Patient-centred medicine, Health services research                                                                                                                                                                                                                                                                                                                                                                                                                                                                                                                                                                    |
| Keywords:                       | PRIMARY CARE, GENERAL MEDICINE (see Internal Medicine), Quality in health care < HEALTH SERVICES ADMINISTRATION & MANAGEMENT, SOCIAL MEDICINE, INTERNAL MEDICINE                                                                                                                                                                                                                                                                                                                                                                                                                                                      |
|                                 |                                                                                                                                                                                                                                                                                                                                                                                                                                                                                                                                                                                                                       |

SCHOLARONE™  
Manuscripts

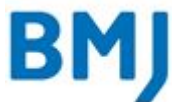

I, the Submitting Author has the right to grant and does grant on behalf of all authors of the Work (as defined in the below author licence), an exclusive licence and/or a non-exclusive licence for contributions from authors who are: i) UK Crown employees; ii) where BMJ has agreed a CC-BY licence shall apply, and/or iii) in accordance with the terms applicable for US Federal Government officers or employees acting as part of their official duties; on a worldwide, perpetual, irrevocable, royalty-free basis to BMJ Publishing Group Ltd ("BMJ") its licensees and where the relevant Journal is co-owned by BMJ to the co-owners of the Journal, to publish the Work in this journal and any other BMJ products and to exploit all rights, as set out in our [licence](#).

The Submitting Author accepts and understands that any supply made under these terms is made by BMJ to the Submitting Author unless you are acting as an employee on behalf of your employer or a postgraduate student of an affiliated institution which is paying any applicable article publishing charge ("APC") for Open Access articles. Where the Submitting Author wishes to make the Work available on an Open Access basis (and intends to pay the relevant APC), the terms of reuse of such Open Access shall be governed by a Creative Commons licence – details of these licences and which [Creative Commons](#) licence will apply to this Work are set out in our licence referred to above.

Other than as permitted in any relevant BMJ Author's Self Archiving Policies, I confirm this Work has not been accepted for publication elsewhere, is not being considered for publication elsewhere and does not duplicate material already published. I confirm all authors consent to publication of this Work and authorise the granting of this licence.

1  
2  
3 **Development and validation of a score to assess complexity of general internal medicine patients**  
4  
5 **at hospital discharge: a prospective cohort study**  
6  
7  
8

9 **Authors:** Fabian D. Liechti, MD-PhD<sup>1</sup>, Thomas Beck, MD<sup>1</sup>, Adrian Rüttsche, MD<sup>2</sup>, Marie C. Roumet<sup>3</sup>,  
10  
11 Andreas Limacher<sup>3</sup>, Tobias Tritschler, MD<sup>1,4</sup>, Jacques D. Donzé, MD, MSc<sup>1,5,6,7</sup>  
12  
13

14 **Author Affiliations:**  
15

16  
17 <sup>1</sup> Department of General Internal Medicine, Inselspital, Bern University Hospital, University of Bern, Bern,  
18  
19 Switzerland  
20

21 <sup>2</sup> Department of Technology and Innovation, Inselspital, Bern University Hospital, University of Bern, Bern,  
22  
23 Switzerland  
24

25 <sup>3</sup> CTU Bern, University of Bern, Bern, Switzerland  
26  
27

28 <sup>4</sup> Department of Medicine, Ottawa Hospital Research Institute, University of Ottawa, Ontario, Canada  
29  
30

31 <sup>5</sup> Division of General Medicine, Brigham and Women's Hospital, Harvard Medical School, Boston,  
32  
33 Massachusetts, USA  
34

35 <sup>6</sup> Division of general internal medicine, Lausanne \_University Hospital, Lausanne, Switzerland  
36  
37

38 <sup>7</sup> Neuchâtel Hospital Network, Department of medicine, Neuchâtel, Switzerland  
39  
40  
41  
42

43 **Corresponding author:** Fabian D. Liechti, Department of General Internal Medicine, Inselspital, Bern  
44  
45 University Hospital, 3010 Bern, Switzerland, e-mail: fabian.liechti@insel.ch  
46

47  
48 Phone: +41 (0)31 632 21 11  
49

50 **Word count:** 3454  
51  
52  
53  
54  
55  
56  
57  
58  
59  
60



1  
2  
3 **Author contributions:** All authors had full access to all the data in the study and take responsibility for  
4 the integrity of the data and the accuracy of the data analysis. FDL: Analysis and interpretation of data,  
5 drafting of the manuscript, critical revision of the manuscript for important intellectual content. TB:  
6 Acquisition of data, analysis and interpretation of data, critical revision of the manuscript for important  
7 intellectual content. AR: Acquisition of data, analysis and interpretation of data, critical revision of the  
8 manuscript for important intellectual content. MCR: Statistical analysis, analysis and interpretation of data,  
9 critical revision of the manuscript for important intellectual content. AL: Analysis and interpretation of data,  
10 critical revision of the manuscript for important intellectual content. TT: Analysis and interpretation of data,  
11 critical revision of the manuscript for important intellectual content. JDD: Study concept and design,  
12 acquisition of data, analysis and interpretation of data, administrative, technical, and material support,  
13 drafting of the manuscript, critical revision of the manuscript for important intellectual content.  
14  
15  
16  
17  
18  
19  
20  
21  
22  
23

24 **Funding:** This work was supported by SGIM foundation. JDD is supported by Swiss National Science  
25 Foundation (grant number 170656). TT is supported by an Early Postdoc.Mobility Award from the Swiss  
26 National Science Foundation (SNSF P2ZHP3\_177999) and a Fellowship Award from the CanVECTOR  
27 Network.  
28  
29  
30  
31  
32

33 **Competing interests:** None declared.  
34  
35

36 **Patient consent for publication:** Not required.  
37

38 **Data availability:** Data are available upon reasonable request.  
39  
40  
41  
42  
43  
44  
45  
46  
47  
48  
49  
50  
51  
52  
53  
54  
55  
56  
57  
58  
59  
60

## Abstract

**Objective:** We aimed to develop and validate a score to assess inpatient complexity and compare its performance with two currently used but not validated tools to estimate complexity (i.e., Charlson Comorbidity Index [CCI], patient clinical complexity level [PCCL]).

**Methods:** Consecutive patients discharged from the department of medicine of a tertiary care hospital were prospectively included into a derivation cohort from October 1, 2016 to February 16, 2017 (n=1,407), and a temporal validation cohort from February 17, 2017, to March 31, 2017 (n=482). The physician in charge assessed complexity. Potential predictors comprised 52 parameters from the electronic health record such as health factors and hospital care usage. We fit a logistic regression model with backward selection to develop a prediction model and derive a score. We assessed and compared performance of model and score in internal and external validation using measures of discrimination and calibration.

**Results:** Overall, 447 of 1,407 patients (32%) in the derivation cohort, and 116 of 482 patients (24%) in the validation cohort were identified as complex. Eleven variables independently associated with complexity were included in the score. Using a cut-off of  $\geq 24$  score points to define high-risk patients, specificity was 81% and sensitivity 57% in the validation cohort. The score's area under the receiver operating characteristic (AUROC) curve was 0.78 in both the derivation and validation cohort. In comparison, the CCI had an AUROC between 0.58 and 0.61, and the PCCL between 0.64 and 0.69, respectively.

**Conclusions:** We derived and internally and externally validated a score that reflects patient complexity in the hospital setting, performed better than other tools, and could help monitoring complex patients.

### Strengths and limitations of this study

- This is a prospective cohort study of consecutive, unselected, adult inpatients discharged from the department of medicine of a large university hospital.
- We derived and validated an easily usable score that accurately assesses patient complexity in medical inpatients that may help monitoring the proportion of complex patients (Patient Complexity Assessment (PCA) score).
- The reference standard used to define complexity was the physician's judgment, which per definition is partly subjective.
- The PCA score has been developed at a single tertiary hospital and may not consider a comprehensive list of important indicators.
- The PCA score includes values available only at discharge and indicators are not modifiable.

**Keywords:** primary care, general medicine, quality in health care, social medicine, internal medicine

## Introduction

One fourth of patients are estimated to be complex in the primary care setting, while this proportion is not well known in the hospital setting.[1-4] Generally, those patients using more resources, time and/or effort are regarded as complex patients, although no universal definition of patient complexity is available.

Complexity is not limited to multimorbidity and chronicity of disease but depends also on multiple other aspects, including psychological, social, economic and environmental factors.[1,2,5-7] Complex patients challenge the current structures, e.g., they have a higher probability of future emergency department utilization (without higher mortality rates) and show suboptimal use of the health care system.[2,8-10]

Identifying complex patients is of economic, epidemiological and social importance because it may help to better allocate resources and improve health care utilization.[5,11]

The only available assessment method to identify complex inpatients is currently the physician's assessment, which limits the monitoring of patient complexity over time.[10,12,13] The Charlson Comorbidity Index (CCI), originally developed and validated to predict mortality,[14] has been assessed as a proxy for patient complexity in the primary care setting. However, agreement between the primary care physician's assessment and the CCI to identify complex patients was only modest.[1,2,5] No such assessment has been yet performed in the hospital setting. The patient clinical complexity level (PCCL) is calculated for each treatment episode to indicate the effect of complications and comorbidities in a patient. The PCCL ranges from 0 (no complication or comorbidity) to 4 (very severe complication or comorbidity), according to a complex algorithm. [14,15] Identification of complex patients at discharge could help to identify those, who would profit from more intense follow-up, e.g. by general practitioners or social workers, although effectiveness of such interventions would have to be proven first.

In order to simplify and standardize the identification of complex patients, we aimed to develop and validate a new score to help identifying the most complex inpatients (Patient Complexity Assessment, PCA score) using readily available administrative and clinical data. Our hypothesis was that some data routinely collected during a hospitalization can be used as a valuable surrogate to physician's assessment. We then compared the performance of the newly developed PCA score to the CCI, and the PCCL used in the Swiss DRG system to allocate reimbursement according to multimorbidity.[14,15]

## Methods

### Study design and participants

This study was a prospective cohort of consecutive, unselected, adult inpatients discharged from the department of medicine of a large University hospital (Inselspital, Bern University Hospital, Bern, Switzerland) between October 1, 2016 and March 31, 2017. The only exclusion criterion was a previous study inclusion. We originally planned to consider around 35 variables in the prediction model. With an estimated proportion of complex patients of one fourth, we preset the sample size of the derivation cohort to be 1,400 (rule of thumb of 10 outcomes per variable tested).[16,17] We predefined, that if more than 1,400 patients will be included during the study period of 6 months, we would use these patients to externally validate the prediction model. Patients enrolled before February 16, 2017 were allocated to the derivation sample (derivation and internal validation cohort), and patients enrolled after this date were allocated to an external validation sample (temporal validation cohort). During their first admission, all patients included in the study gave their written general consent to the use of their routine data for research purposes. The study was approved by the local ethics committee (Kantonale Ethikkommission Bern, ID 2016-01319). We reported the study in accordance with the Transparent Reporting of a Multivariable Prediction Model for Individual Prognosis Or Diagnosis (TRIPOD) statement.[18]

### Patient and public involvement

No patient involved.

### Study outcome and predictor variables

The primary outcome was the predictive accuracy of the PCA against the treating physician's judgment as the gold standard to identify complex general internal medicine inpatients. Complex patients were defined as those using more resources, time and/or effort while hospitalized. The resident (or supervising consultant) was asked by a trained study nurse to assess at time of discharge the level of complexity of the entire hospital stay of her/his patient without providing any specific scoring system (complex or not-complex).

The CCI was originally developed to predict 10-year survival by using an algorithm based on addition of score points for specific diagnoses.[14,19] The PCCL was derived from the electronic health record (no complication or comorbidity: 0; light complication or comorbidity: 1; moderate complication or comorbidity:

1  
2  
3 2; severe complication or comorbidity: 3; very severe complication or comorbidity: 4) and is defined by  
4 SwissDRG.[20,21]  
5

6  
7 For all patients, information regarding International Classification of Disease (ICD) codes and other  
8 potential indicators for patient complexity were collected retrospectively through the electronic health  
9 record of the hospital. Candidate predictor variables have been selected based on a previous survey  
10 among general internists in the hospital setting which asked them to identify factors that contribute to  
11 patient complexity,[4] and on a selection of readily available potential predictors to have a broad spectrum  
12 of candidate predictors. Variables that were not routinely collected were removed (i.e. variables with more  
13 than 25% missing data, such as aspartate amino transferase, C-reactive protein, and albumin at  
14 discharge). Collinearity between variables was assessed using Pearson correlation coefficients. In case of  
15 strong correlation ( $r > 0.7$ ), only the strongest univariate predictor was kept. A final list of 52 indicators was  
16 considered in denoting complexity: baseline demographic information (age, gender, living area (rural  
17 versus urban, defined according to the Swiss Federal Statistical Office based on the patient's place of  
18 residence ), marital status, institutional care before admission, nationality (Swiss vs. non-Swiss), hospital  
19 variables (urgent vs. elective admission, number of previous hospitalization in the last 12 months, patient  
20 destination [death, home, other hospital, nursing home, rehabilitation, other], stay on the intensive care  
21 unit, internal transfer), drugs (for each group of the Anatomical, Therapeutic and Chemical [ATC]  
22 classification categories) at admission and at discharge and polypharmacy ( $\geq 10$  drugs [22], at admission  
23 and discharge ), main diagnosis (cancer, chronic obstructive pulmonary disease, dementia, depression,  
24 heart failure, pneumonia, sepsis, stroke, substance abuse, syncope, malnutrition, based on the Tenth  
25 Revision of the International Statistical Classification of Diseases and Related Health Problems [ICD-10]  
26 code), number of diagnoses at discharge, CCI, laboratory values (hemoglobin, leucocyte count and  
27 thrombocyte count, serum sodium and creatinine) at admission (first lab values at admission) and  
28 discharge (last lab values before discharge), number of interventions and costs (normal vs. high costs,  
29 i.e.,  $\geq$  the 75<sup>th</sup> empirical percentile value) during hospitalization of blood products, drugs, imaging  
30 procedures, physiotherapy, and nursing workload.  
31  
32  
33  
34  
35  
36  
37  
38  
39  
40  
41  
42  
43  
44  
45  
46  
47  
48  
49  
50  
51  
52  
53  
54  
55  
56  
57  
58  
59  
60

### Missing data

When missing, the value of hemoglobin and creatinine at discharge was assumed to be identical to the value at admission. When missing, the value of sodium and platelet count at discharge was considered normal. For other potential indicators of complexity, we assumed data to be missing at random and imputed missing data using single imputation by chained equations. To compare performance measures of the PCA with the CCI and PCCL, patients with missing values for the PCCL variable (n=3 for the derivation, n=11 for the validation dataset) were removed prior to analysis.

### Statistical analysis

Multivariable logistic regression analysis with backward selection was used in the derivation set to predict complexity based on 52 potential indicators of complexity variables registered during hospitalization, removing variables with a p-value >0.1. Calibration of the final model was evaluated by constructing a calibration curve, estimating the calibration slope, calculating the difference between the mean observed proportion and mean predicted proportion of patients with high complexity (calibration-in-the-large) and the Brier score (overall measure of accuracy) in the derivation and validation set. The predictors from the final model were used to create a comprehensible score using the regression coefficient-based scoring technique.[23] Beta-coefficients were divided by the lowest coefficient and rounded up to the closest integer to generate score points, indicating increasing risk by higher scores. The discriminatory power of the score was assessed by calculating the area under the receiver operating characteristic (AUROC) curve.

The validity of performance measures was investigated by performing internal and external validation. For internal validation we used 1000 bootstrap samples, drawing samples with replacement from the derivation sample.[24] The bootstrap-corrected performance estimates were calculated by subtracting the optimism from the performance of the original model. The 95% confidence intervals (CI) for the bootstrapped performance measures were derived using the percentile method. External validation was made by estimating the same performance measures in the external validation cohort (temporal validation).

The clinical usefulness of the developed score was assessed with a decision-curve analysis investigating whether the use of the complexity score instead of the CCI alone was associated with benefit gains relative to the prediction complexity.[25]

Applying PCA, CCI and PCCL, we calculated the score of each patient and split the patient sample into a high and a low risk group. The reference point (cut-off) of each scoring system was chosen in order to make the frequency of patients in the high-risk category as close as possible to 30% (i.e. approximating the frequency of observed complex patients). To determine the accuracy of this method to predict complexity, we estimated sensitivity, specificity, and positive and negative predictive value in both the derivation and validation set for PCA and in the derivation set for CCI and PCCL.

R version 3.3.1 was used for statistical analysis.

## Results

A total of 1,889 patients were included in the study (figure 1). Patients enrolled before February 16, 2017 were allocated to the derivation sample (n = 1,407), patients enrolled after this date (n = 482) were allocated to the temporal validation sample. In the derivation cohort, 447 patients (31.8%) were clinically judged as complex, and 116 (24.1%) patients in the validation cohort. The patients in the two cohorts presented with similar baseline characteristics (table 1 and supplementary material table S1 and S2). The overall median age was 80 years (interquartile range 75 to 86 years).

**Table 1: Baseline characteristics for all patients (derivation and validation cohort) stratified by complexity, as number and percentage or median and inter-quartile range for categorical and continuous variables, respectively.**

|                | Overall<br>(N=1889)                   | Non-<br>complex<br>(N=1326) | Complex<br>(N=563) |
|----------------|---------------------------------------|-----------------------------|--------------------|
|                | n (%) or median [interquartile range] |                             |                    |
| <b>Age</b>     |                                       |                             |                    |
| ≥ 80 years     | 579 (31)                              | 442 (33)                    | 137 (24)           |
| 70 to 79 years | 437 (23)                              | 304 (23)                    | 133 (24)           |
| 60 to 69 years | 322 (17)                              | 211 (16)                    | 111 (20)           |
| < 60 years     | 537 (28)                              | 363 (27)                    | 174 (31)           |
| Missing        | 14 (0.7)                              | 6 (0.5)                     | 8 (1.4)            |
| <b>Gender</b>  |                                       |                             |                    |
| Male           | 1002 (53)                             | 693 (52)                    | 309 (55)           |
| Female         | 873 (46)                              | 627 (47)                    | 246 (44)           |
| Missing        | 14 (0.7)                              | 6 (0.5)                     | 8 (1)              |



|                                                                                  |           |          |          |
|----------------------------------------------------------------------------------|-----------|----------|----------|
| <b>Living area<sup>1</sup></b>                                                   |           |          |          |
| Urban                                                                            | 611 (32)  | 453 (34) | 158 (28) |
| Rural                                                                            | 1238 (65) | 848 (64) | 390 (69) |
| Missing                                                                          | 40 (2)    | 25 (1)   | 15 (3)   |
| <b>Marital status</b>                                                            |           |          |          |
| Single                                                                           | 331 (17)  | 252 (19) | 79 (14)  |
| Couple                                                                           | 636 (34)  | 429 (32) | 207 (37) |
| Widowed                                                                          | 916 (48)  | 641 (48) | 275 (49) |
| Missing                                                                          | 6 (0.3)   | 4 (0.3)  | 2 (0.4)  |
| <b>Hospitalization within last 12 months</b>                                     | 673 (36)  | 452 (34) | 221 (39) |
| <b>Medication<sup>2</sup></b>                                                    |           |          |          |
| Antineoplastic and immunomodulating agents at admission                          | 70 (4)    | 38 (3)   | 32 (6)   |
| Nervous system at admission                                                      | 1340 (71) | 918 (69) | 422 (75) |
| Systemic hormonal preparations, excluding sex hormones and insulins at discharge | 524 (28)  | 318 (24) | 206 (37) |
| <b>High costs during hospitalization<sup>3</sup></b>                             |           |          |          |
| For imaging procedures                                                           | 485 (26)  | 255 (19) | 230 (41) |
| For laboratory analysis                                                          | 482 (25)  | 203 (15) | 279 (50) |
| <b>High nurse workload<sup>4</sup></b>                                           | 475 (25)  | 203 (15) | 272 (48) |
| <b>Charlson Comorbidity Index</b>                                                | 2 [0; 4]  | 2 [0; 3] | 3 [1; 5] |
| <b>Principal or concomitant diagnosis at discharge</b>                           |           |          |          |
| Cancer <sup>5</sup>                                                              | 225 (12)  | 136 (10) | 89 (16)  |
| COPD <sup>6</sup>                                                                | 186 (10)  | 124 (9)  | 62 (11)  |
| Dementia <sup>7</sup>                                                            | 163 (9)   | 125 (9)  | 38 (7)   |
| Depression <sup>8</sup>                                                          | 209 (11)  | 140 (11) | 69 (12)  |
| Heart failure <sup>9</sup>                                                       | 327 (17)  | 206 (15) | 121 (21) |
| Pneumonia <sup>10</sup>                                                          | 244 (13)  | 159 (12) | 85 (15)  |
| Sepsis <sup>11</sup>                                                             | 229 (12)  | 132 (10) | 97 (17)  |
| Stroke <sup>12</sup>                                                             | 90 (5)    | 65 (5)   | 25 (4)   |
| Substance abuse <sup>13</sup>                                                    | 212 (11)  | 129 (10) | 83 (15)  |
| Syncope <sup>14</sup>                                                            | 81 (4)    | 67 (5)   | 14 (2)   |
| Malnutrition <sup>15</sup>                                                       | 265 (14)  | 122 (9)  | 143 (25) |
| <b>Multimorbidity</b>                                                            |           |          |          |
| Low (number of diagnoses ≤ 6)                                                    | 510 (27)  | 435 (33) | 75 (13)  |

<sup>1</sup> Defined according to the Swiss Federal Statistical Office based on place of residence

<sup>2</sup> Group of drugs according to ATC classification

<sup>3</sup> Defined as costs of all imaging procedures or medication during hospital stay above 75<sup>th</sup> percentile

<sup>4</sup> Defined as sum of hours of all nursing work (incl. sitting guard) during hospital stay above 75<sup>th</sup> percentile

<sup>5</sup> ICD10-codes B21, C00 through C97, Z03.1

<sup>6</sup> ICD10-codes J44

<sup>7</sup> ICD10-codes F00 through F03, F05.0, F05.1

<sup>8</sup> ICD10-codes F20.4, F25.1, F31.3 F31.4, F31.5, F32, F33, F41.2, F92.0

<sup>9</sup> ICD10-codes I50

<sup>10</sup> ICD10-codes A48.1, B01.2, B05.2, J10.0, J11.0, J12 through J18, J68.0, J69, J85.1, O74.0, U69.00

<sup>11</sup> ICD10-codes A02.1, A20.7, A22.7, A26.7, A32.7, A39.2, A39.3, A39.4, A40, A41, A42.7, B37.7

<sup>12</sup> ICD10-codes I63

<sup>13</sup> ICD10-codes F10 through F19, F53, F66.8, F66.9

<sup>14</sup> ICD10-codes R55

<sup>15</sup> ICD10-codes E40 through E46

|                                                        |           |          |          |
|--------------------------------------------------------|-----------|----------|----------|
| Middle (number of diagnoses > 6 and <14) <sup>16</sup> | 841 (44)  | 603 (45) | 238 (42) |
| High (number of diagnoses ≥ 14)                        | 524 (28)  | 282 (21) | 242 (43) |
| <b>PCCL</b>                                            | 3 [2; 4]  | 3 [1; 4] | 4 [3; 4] |
| No complication or comorbidity                         | 380 (20)  | 312 (23) | 68 (12)  |
| Light complication or comorbidity                      | 29 (1)    | 21 (2)   | 8 (1)    |
| Moderate complication or comorbidity                   | 292 (15)  | 233 (18) | 59 (10)  |
| Severe complication or comorbidity                     | 533 (28)  | 409 (31) | 124 (22) |
| Very severe complication or comorbidity                | 641 (34)  | 345 (26) | 296 (53) |
| Missing                                                | 14 (0.7)  | 6 (0.5)  | 8 (1.4)  |
| <b>Abnormal creatinine level<sup>17</sup></b>          |           |          |          |
| At admission and discharge                             | 368 (19)  | 241 (18) | 127 (23) |
| At admission only                                      | 182 (10)  | 106 (8)  | 76 (13)  |
| At discharge only                                      | 63 (3)    | 34 (3)   | 29 (5)   |
| Missing                                                | 364 (19)  | 311 (23) | 53 (9)   |
| <b>Leukocytosis<sup>18</sup></b>                       |           |          |          |
| At admission and discharge                             | 77 (41)   | 47 (3)   | 30 (5)   |
| At admission only                                      | 19 (1)    | 8 (<1)   | 11 (2)   |
| At discharge only                                      | 13 (<1)   | 5 (<1)   | 8 (1)    |
| Missing                                                | 351 (19)  | 306 (23) | 45 (8)   |
| <b>Patient destination</b>                             |           |          |          |
| Death                                                  | 134 (7)   | 91 (7)   | 43 (8)   |
| Home                                                   | 1178 (62) | 873 (66) | 305 (54) |
| Hospital                                               | 191 (10)  | 119 (9)  | 72 (13)  |
| Nursing home                                           | 155 (8)   | 108 (8)  | 47 (8)   |
| Rehabilitation                                         | 171 (9)   | 101 (8)  | 70 (12)  |
| Others and missing                                     | 60 (3)    | 24 (3)   | 26 (5)   |

After backward selection, 11 of the 52 potential predictors were used to derive the PCA score (Table 2). Besides diagnosis-related factors, they represented demographic characteristic, hospital variables, medication and laboratory values. Highest score points were assigned to leukocytosis (at discharge only, 16 points, and at admission and discharge, 10 points) followed by age under 60 years, high nurse workload (costs above 75<sup>th</sup> percentile for nursing expenses), and abnormal serum creatinine at discharge ( $\geq 100 \mu\text{mol/l}$ ).

**Table 2: PCA score weighted according to coefficients**

| Variable       | Coefficient (95% CI) | Score points |
|----------------|----------------------|--------------|
| <b>Age</b>     |                      |              |
| ≥ 80 years     | Reference            |              |
| 70 to 79 years | 0.36 (0, 0.72)       | 3            |

<sup>16</sup> Between 25<sup>th</sup> and 75<sup>th</sup> percentile

<sup>17</sup> Defined as creatinine  $\geq 100 \mu\text{mol/l}$

<sup>18</sup> Defined as leukocyte count  $\geq 20 \text{ G/l}$

|                                                       |                      |    |
|-------------------------------------------------------|----------------------|----|
| 60 to 69 years                                        | 0.5 (0.1, 0.9)       | 5  |
| < 60 years                                            | 0.94 (0.56, 1.31)    | 9  |
| <b>Elective admission</b>                             | 0.36 (0.03, 0.69)    | 3  |
| <b>High costs during hospitalization<sup>19</sup></b> |                      |    |
| For imaging procedures                                | 0.6 (0.31, 0.9)      | 6  |
| For laboratory analysis                               | 0.77 (0.46, 1.09)    | 7  |
| <b>High nurse workload<sup>20</sup></b>               | 0.93 (0.61, 1.26)    | 9  |
| <b>Malnutrition<sup>21</sup></b>                      | 0.47 (0.1, 0.84)     | 4  |
| <b>Multimorbidity</b>                                 |                      |    |
| Number of diagnoses ≤ 6                               | Reference            |    |
| Number of diagnoses > 6 and <14 <sup>22</sup>         | 0.61 (0.25, 0.96)    | 6  |
| Number of diagnoses ≥ 14 <sup>23</sup>                | 0.78 (0.36, 1.2)     | 7  |
| <b>Medication at admission<sup>24</sup></b>           |                      |    |
| Antineoplastic and immunomodulating agents            | 0.85 (0.16, 1.54)    | 8  |
| Nervous system                                        | 0.33 (0.04, 0.63)    | 3  |
| <b>Abnormal creatinine level<sup>25</sup></b>         |                      |    |
| None                                                  | Reference            |    |
| At admission only                                     | 0.23 (-0.22, 0.68)   | 2  |
| At admission and discharge                            | 0.11 (-0.22, 0.45)   | 1  |
| At discharge only                                     | 0.96 (0.29, 1.63)    | 9  |
| <b>Leukocytosis<sup>26</sup></b>                      |                      |    |
| None                                                  | Reference            |    |
| At admission only                                     | 0.11 (-0.49, 0.71)   | 1  |
| At admission and discharge                            | 1.12 (-0.04, 2.29)   | 10 |
| At discharge only                                     | 1.68 (0.18, 3.18)    | 16 |
| <b>Intercept</b>                                      | -2.93 (-3.39, -2.46) | NA |

The prediction model showed a good accuracy, with a Brier score of 0.17 and 0.15 in internal and external validation, respectively. The calibration curve showed fair agreement between predicted and observed proportions of complexity in the derivation cohort and slightly lower observed proportions than predicted probabilities in the validation cohort (graphs not shown). The calibration-in-the-large coefficient of -0.51 (95% CI -0.74 to -0.27) in the validation cohort implies that the mean observed proportion was lower than

<sup>19</sup> Defined as costs of all imaging procedures or medication during hospital stay above 75<sup>th</sup> percentile

<sup>20</sup> Defined as sum of hours of all nursing work (incl. sitting guard) during hospital stay above 75<sup>th</sup> percentile

<sup>21</sup> ICD10-codes E40 through E46

<sup>22</sup> Between 25<sup>th</sup> and 75<sup>th</sup> percentile

<sup>23</sup> Above 75<sup>th</sup> percentile

<sup>24</sup> Group of drugs according to ATC classification

<sup>25</sup> Defined as serum creatinine ≥100 µmol/l

<sup>26</sup> Defined as blood leukocyte count ≥20 G/l

the mean predicted probability. However, the calibration curve slope was satisfactory in internal and external validation (0.93 [95% CI 0.80 to 1.05] and 0.96 [95% CI 0.74 to 1.18]), respectively.

The median score was 17 points in the derivation and validation cohort (mean 18.77 and 19.03, respectively). The minimal score was 0 points in both cohorts, the maximal score reached was 54 points in the derivation cohort and 53 points in the validation cohort (theoretically maximal 81 score points). The score's area under the receiver operating characteristic (AUROC) curve was 0.77 (95% CI 0.74 to 0.79) and 0.78 (95% CI 0.74 to 0.82) in internal and external validation.

**Table 3: Stratification of Observed vs. predicted complex patients applying the PCA score.**

|                       | Score points | Risk category of complexity | Patients in each category | Complex patients | Estimated risk of complexity |
|-----------------------|--------------|-----------------------------|---------------------------|------------------|------------------------------|
| <b>Derivation set</b> | < 24         | Low risk                    | 991 (70%)                 | 193 (19%)        | 19                           |
|                       | ≥ 24         | High risk                   | 416 (30%)                 | 254 (61%)        | 61                           |
| <b>Validation set</b> | < 24         | Low risk                    | 347 (72%)                 | 50 (14%)         | 20                           |
|                       | ≥ 24         | High risk                   | 135 (28%)                 | 66 (49%)         | 62                           |

We classified patients as low and high complexity risk (table 3) according to the selected cut-off of 24 points (approximating the frequency of observed complex patients of 30%). The proportion of patients categorized as complex (i.e. score ≥ 24 points) was 30% and 28% in the derivation and validation dataset, respectively. Sensitivity was 57% in both the derivation and validation dataset. The specificity was 83% and 81%, respectively. Positive predictive values were 61% and 49% in the derivation and validation cohort, respectively, while negative predictive values were 81% and 86%, respectively. The discriminatory power of the PCA score was robust with an AUROC of 0.77 (95% CI 0.74 to 0.79) in internal validation (bootstrap-corrected value) and 0.78 (95% CI 0.74 to 0.82) in external validation (table 4 and supplementary figure S2).

**Table 4: Measures of performance to predict complexity**

|                                  | PCA, derivation set % (95%-CI) | PCA, validation set % (95%-CI) | CCI, validation set % (95%-CI) | PCCL, validation set % (95%-CI) |
|----------------------------------|--------------------------------|--------------------------------|--------------------------------|---------------------------------|
| <b>Sensitivity</b>               | 57 (52-61)                     | 57 (47-66)                     | 41 (32-50)                     | 61 (51-70)                      |
| <b>Specificity</b>               | 83 (81-85)                     | 81 (77-85)                     | 75 (71-80)                     | 75 (70-79)                      |
| <b>Positive predictive value</b> | 61 (59-66)                     | 49 (40-58)                     | 34 (26-43)                     | 42 (34-50)                      |
| <b>Negative predictive value</b> | 81 (78-83)                     | 86 (81-89)                     | 80 (75-84)                     | 86 (82-90)                      |

| Misclassification error | 25 (28-23)                     | 25 (29-21)       | 33 (37-29)       | 28 (33-24)       |
|-------------------------|--------------------------------|------------------|------------------|------------------|
| AUROC <sup>27</sup>     | 0.77 (0.74-0.79) <sup>28</sup> | 0.78 (0.74-0.82) | 0.62 (0.56-0.68) | 0.69 (0.64-0.75) |

In comparison, predictive accuracy of the CCI was lower compared to the PCA score. The AUROCs were low with 0.58 (95% CI 0.55 to 0.62) and 0.62 (95% CI 0.56 to 0.68) in the derivation and validation cohort, respectively (table 4). Sensitivity of the CCI reached 36% (95% CI 31% to 40%) and 41% (95% CI 31% to 50%) in derivation and validation cohort, respectively, while specificity was 76% (95% CI 73% to 78%) and 75% (95% CI 71% to 80%), respectively. The decision curve analysis (supplementary figure S1) indicates a superiority of the PCA score compared to the CCI to predict complexity.

AUROCs of PCCL were between those of CCI and PCA score with 0.64 (95% CI 0.61 to 0.67) and 0.69 (95% CI 0.64 to 0.75) in the derivation and validation cohort, respectively (table 4). Sensitivity was 52% (95% CI 47% to 56%) and 61% (95% CI 51% to 70%), respectively, while specificity was 73% (95% CI 71% to 76%) and 75% (95% CI 70% to 79%).

## Discussion

We derived and validated the PCA score that accurately assessed patient complexity in medical inpatients. The final score of eleven independent and readily available factors, included age, hospital variables, diagnosis related aspects and laboratory variables. The PCA score showed overall good performance with a discriminatory power of 0.78 that surpasses other comorbidity-based tools such as the Charlson comorbidity index and the PCCL.

In this cohort of medical inpatients, 32% and 24% were considered “complex” by the treating physician, in the derivation and the validation cohort, respectively. This first estimate of patient complexity in the hospital setting is consistent with a previous assessment in an outpatient population where 26% of total 4,302 patients were categorized as being complex by a primary care physician.[1] Based on these data, the authors later derived a model to identify around 20% of 143,372 primary care patients as complex.

<sup>27</sup> Area under receiver operating characteristic

<sup>28</sup> Bootstrap-corrected from internal validation

1  
2  
3 Using the model and outpatient CCI or PCCL, only modest agreement between the methods was  
4 observed (37% and 40%, respectively).[2] Therefore, a tool not solely based on multimorbidity, such as  
5 the newly developed PCA score, seems to better identify complex patients.  
6  
7

8  
9 In the present study, age was an inverse indicator of complexity. In a previous study of outpatients, mean  
10 age of complex patients was 60 years versus 48 years in non-complex patients.[1] Nonetheless, the same  
11 study reported noteworthy age-related variability: in younger patients the association of certain diagnoses  
12 (e.g. alcohol-related diseases) with complexity was stronger, and deprivation as contributor to complexity  
13 is independent of age.[1,5] In our setting, discharge planning processes for older patients may be better  
14 established (e.g. including hospital social services, decision making based on patient's provision and  
15 possibility for indiscriminate discharge to geriatric rehabilitation facilities or nursing homes) compared to  
16 younger patients.[1,9,26,27] Treating physicians may therefore perceive the discharge planning process of  
17 some younger patients as difficult and categorize these patients as complex. Furthermore, young non-  
18 complex patients may more often be treated as outpatients or by specialist's clinics instead of our tertiary  
19 care general internal medicine ward. Elective admissions to a tertiary hospital may represent a cohort of  
20 rather complex patients preselected by primary care physicians and smaller hospitals (21% elective  
21 admissions in complex patients versus 14% in non-complex patients). The inverse relationship between  
22 age and complexity, and the relationship between elective admissions and complexity may therefore  
23 represent structural incentives to hospitalize complex younger patients which overburden outpatient care.  
24 It is also possible that these patients are only perceived as more complex by the treating physician  
25 because patients admitted directly to the medical ward are pending initial work-up otherwise provided in  
26 the emergency department.  
27  
28  
29  
30  
31  
32  
33  
34  
35  
36  
37  
38  
39  
40  
41  
42  
43

44 Patients with high costs of imaging procedures may reflect the patients with more severe diseases or  
45 more diagnosis uncertainty. Similarly, high costs for laboratory analysis may be explained by a higher  
46 need of costly or repeated measurements in more complex patients. High costs for care/nursing were  
47 indicators of complexity highlighting some concordance between the nurse workload and the medical  
48 complexity.  
49  
50  
51  
52  
53

54 In our study multimorbidity (defined as a number of more than 6 diagnoses) was an indicator of  
55 complexity. Comorbidity-based scores, i.e., the CCI, are commonly used to identify complex patients.  
56  
57  
58  
59

1  
2  
3 Indeed, in the study of Grant et al. the proportion of multimorbid patients identified by a CCI of 2 or more  
4 was higher in complex patients, i.e., 26% of complex patients were multimorbid versus 9% of non-complex  
5 patients.[1] However, many multimorbid patients are not complex and not all complex patients are  
6 multimorbid. In our cohort (derivation and validation datasets together) 34% of polymorbid patients (CCI  
7  $\geq 2$ ) were complex versus 24% in the group of CCI  $< 2$ . Comparably, nearly one half of patients with a CCI  
8 of 2 or greater were classified as non-complex in the study of Grant et al.[1] Therefore, a system to identify  
9 complexity should not depend on diagnosis alone.  
10  
11  
12  
13  
14  
15

16  
17 In the PCA score, malnutrition was a risk factor of complexity. Malnutrition in hospitalized patients is  
18 associated with more complications, increased mortality, longer hospital stays and higher costs [28,29].  
19 Therefore, malnutrition and complexity may both reflect a cluster of severe and chronic disease as well as  
20 socioeconomic circumstances.[1]  
21  
22  
23  
24

25 Antineoplastic and immunomodulating medication at admission was an indicator of complexity. These  
26 drugs are used for oncologic patients, but also in patients with rheumatologic disease or after receiving  
27 organ transplants. These patients may be complex because of challenging infectious diseases, end-of-life  
28 issues and interdisciplinary care. Abnormal values of serum creatinine and leukocyte counts at discharge  
29 were denoting complexity whether the values were normal or abnormal at admission. These patients may  
30 also requiring more interaction between specialists and may complicate the discharge process.  
31  
32  
33  
34  
35  
36

37 Personal characteristics or mental health issues and use of psychoactive medication, i.e., narcotics,  
38 selective serotonin reuptake inhibitors, benzodiazepines, smoking cessation agents and antipsychotics,  
39 have been described as characterizing complex patients, especially in younger patients.[1] This is in line  
40 with the observation that in the PCA score, use of medication affecting the nervous system at admission  
41 (including antipsychotics, mood-stabilizers, sedatives, analgesics including opioids, anticonvulsive  
42 medication and anti-dementia drugs) was an indicator of complexity. These patients may challenge the  
43 known pathways of the healthcare system, e.g. by parallel use of general internal medicine and psychiatric  
44 resources.  
45  
46  
47  
48  
49  
50  
51  
52

53 There are several limitations of the study. First, we used physician's assessment to define complexity,  
54 which per definition is subjective. Nonetheless, there is no better standard reference (gold standard) and  
55 the proportion of patients identified as complex was similar in previous studies.[1,2] Second, the PCA  
56  
57  
58  
59

1  
2  
3 score has been developed at a single tertiary hospital in Switzerland and therefore may not be  
4 generalizable to other settings, e.g. other health care systems. However, costs and nursing workload are  
5 not measured as absolute values but as those above the 75<sup>th</sup> percentile, making it transferable to other  
6 settings. Also, some patients may appear as complex in one setting, while they will be judged as non-  
7 complex in other settings (e.g. primary care vs. university hospital), nevertheless the proportion of  
8 complex patients in out setting was similar to the one in primary care.[1] Therefore, in other health  
9 systems the final indicators may vary, which might be considered when validating the PCA score. Third, it  
10 is likely that our model does not consider every important indicator, but it allows deriving an easily usable  
11 tool which kept its fair sensitivity and good specificity in our external validation. Fourth, the PCA score  
12 includes values available only at discharge, which makes patient-aimed interventions during  
13 hospitalization difficult. This is however also true for alternative assessment tools, such as the CCI and the  
14 PCCL, which had a lower performance in identifying complex patients in our cohort. Fifth, imputation of  
15 missing data may have changed the outcome of the study. However, potential predictors with more than  
16 25% missing data were excluded. Sixth, most of the included indicators are not modifiable. For example, a  
17 patient will still be complex if receiving less imaging procedures to reduce costs.

18  
19  
20 To our knowledge, the PCA score is the first tool to identify complex medical patients in the hospital  
21 setting. It can easily be calculated and is therefore predestined to be used for population-based studies as  
22 it does not involve individual judgement of a physician. With its prospective design and inclusion of a large  
23 number of medical inpatients, this study has a strong design.

24  
25  
26 Identification of complex patients by this simple tool using electronically available data may help  
27 monitoring the proportion of complex patients in the hospital setting and comparing patient complexity  
28 level between hospitals. Thereby, the PCA score might improve the monitoring of resources distribution  
29 and coordination of care, e.g. by flagging complex patients to general practitioners or social workers for  
30 closer follow-up or low-threshold service.



### Acknowledgements

We acknowledge the support by Roland Angerer (coding data) and Barbara Ammann (workload nurse).

### References

1. Grant RW, Ashburner JM, Hong CS, Chang Y, Barry MJ, et al. (2011) Defining patient complexity from the primary care physician's perspective: a cohort study. *Ann Intern Med* 155: 797-804.
2. Hong CS, Atlas SJ, Ashburner JM, Chang Y, He W, et al. (2015) Evaluating a Model to Predict Primary Care Physician-Defined Complexity in a Large Academic Primary Care Practice-Based Research Network. *J Gen Intern Med* 30: 1741-1747.
3. Katerndahl D (2014) Providing complex (rather than complicated) chronic care. *J Am Board Fam Med* 27: 6-7.
4. Crelier B, Streit S, Donzé JD (2018) Patient Complexity Characteristics in the Hospital Setting. *The American Journal of Accountable Care* 9: 3-8.
5. Mercer SW, Guthrie B, Furler J, Watt GC, Hart JT (2012) Multimorbidity and the inverse care law in primary care. *BMJ* 344: e4152.
6. Peek CJ, Baird MA, Coleman E (2009) Primary care for patient complexity, not only disease. *Fam Syst Health* 27: 287-302.
7. Safford MM, Allison JJ, Kiefe CI (2007) Patient complexity: more than comorbidity. the vector model of complexity. *J Gen Intern Med* 22 Suppl 3: 382-390.
8. Gupta S, Perry JA, Kozar R (2019) Transitions of Care in Geriatric Medicine. *Clin Geriatr Med* 35: 45-52.

- 1  
2  
3 9. Kutz A, Ebrahimi F, Struja T, Greenwald J, Schuetz P, et al. (2017) Innovative transition  
4 interventions to better align healthcare needs in hospitalised medical patients. *Swiss Med Wkly*  
5 147: w14515.  
6  
7
- 8  
9  
10 10. Schaink AK, Kuluski K, Lyons RF, Fortin M, Jadad AR, et al. (2012) A scoping review and  
11 thematic classification of patient complexity: offering a unifying framework. *J Comorb* 2: 1-9.  
12  
13
- 14  
15 11. Sturmberg JP, Martin CM, Katerndahl DA (2014) Systems and complexity thinking in the  
16 general practice literature: an integrative, historical narrative review. *Ann Fam Med* 12: 66-74.  
17  
18
- 19  
20 12. Sturmberg JP, Martin CM, Katerndahl DA (2017) It is complicated! - misunderstanding the  
21 complexities of 'complex'. *J Eval Clin Pract* 23: 426-429.  
22  
23
- 24  
25 13. Weiss KB (2007) Managing complexity in chronic care: an overview of the VA state-of-the-art  
26 (SOTA) conference. *J Gen Intern Med* 22 Suppl 3: 374-378.  
27  
28
- 29  
30 14. Charlson ME, Pompei P, Ales KL, MacKenzie CR (1987) A new method of classifying  
31 prognostic comorbidity in longitudinal studies: development and validation. *J Chronic Dis* 40:  
32 373-383.  
33  
34
- 35  
36 15. Mehra T, Muller CT, Volbracht J, Seifert B, Moos R (2015) Predictors of High Profit and High  
37 Deficit Outliers under SwissDRG of a Tertiary Care Center. *PLoS One* 10: e0140874.  
38  
39
- 40  
41 16. Harrell FE, Jr., Lee KL, Mark DB (1996) Multivariable prognostic models: issues in  
42 developing models, evaluating assumptions and adequacy, and measuring and reducing errors.  
43  
44  
45  
46  
47  
48  
49  
50  
51  
52  
53  
54  
55  
56  
57  
58  
59  
60
17. Peduzzi P, Concato J, Kemper E, Holford TR, Feinstein AR (1996) A simulation study of the  
number of events per variable in logistic regression analysis. *J Clin Epidemiol* 49: 1373-1379.

- 1  
2  
3 18. Collins GS, Reitsma JB, Altman DG, Moons KG (2015) Transparent Reporting of a  
4 multivariable prediction model for Individual Prognosis Or Diagnosis (TRIPOD). *Ann Intern Med*  
5 162: 735-736.  
6  
7  
8  
9  
10 19. Barker AL, Morello RT, Wolfe R, Brand CA, Haines TP, et al. (2016) 6-PACK programme to  
11 decrease fall injuries in acute hospitals: cluster randomised controlled trial. *BMJ* 352: h6781.  
12  
13  
14 20. SwissDRG (2015) Swiss Diagnosis Related Groups Version 5.0, Abrechnunsversion  
15 (2016/2016).  
16  
17  
18  
19 21. SwissDRG (2016) Swiss Diagnosis Related Groups Version 6.0, Abrechnunsversion  
20 (2017/2017).  
21  
22  
23  
24 22. Masnoon N, Shakib S, Kalisch-Ellett L, Caughey GE (2017) What is polypharmacy? A  
25 systematic review of definitions. *BMC Geriatr* 17: 230.  
26  
27  
28  
29 23. Moons KG, Harrell FE, Steyerberg EW (2002) Should scoring rules be based on odds ratios  
30 or regression coefficients? *J Clin Epidemiol* 55: 1054-1055.  
31  
32  
33  
34 24. Steyerberg EW, Harrell FE, Jr., Borsboom GJ, Eijkemans MJ, Vergouwe Y, et al. (2001)  
35 Internal validation of predictive models: efficiency of some procedures for logistic regression  
36 analysis. *J Clin Epidemiol* 54: 774-781.  
37  
38  
39  
40  
41 25. Rousson V, Zumbo T (2011) Decision curve analysis revisited: overall net benefit,  
42 relationships to ROC curve analysis, and application to case-control studies. *BMC Med Inform*  
43 *Decis Mak* 11: 45.  
44  
45  
46  
47  
48 26. Biller-Andorno N, Zeltner T (2015) Individual Responsibility and Community Solidarity--The  
49 Swiss Health Care System. *N Engl J Med* 373: 2193-2197.  
50  
51  
52  
53 27. Mabire C, Bula C, Morin D, Goulet C (2015) Nursing discharge planning for older medical  
54 inpatients in Switzerland: A cross-sectional study. *Geriatr Nurs* 36: 451-457.  
55  
56  
57  
58  
59  
60

1  
2  
3 28. Correia MI, Waitzberg DL (2003) The impact of malnutrition on morbidity, mortality, length of  
4 hospital stay and costs evaluated through a multivariate model analysis. Clin Nutr 22: 235-239.  
5  
6

7  
8 29. Norman K, Pichard C, Lochs H, Pirlich M (2008) Prognostic impact of disease-related  
9 malnutrition. Clin Nutr 27: 5-15.  
10  
11

12  
13  
14  
15 **Figure 1 caption**

16  
17 Flow chart. Derivation sample (derivation and internal validation cohort) and external validation sample  
18 (temporal validation cohort).  
19  
20  
21  
22  
23  
24  
25  
26  
27  
28  
29  
30  
31  
32  
33  
34  
35  
36  
37  
38  
39  
40  
41  
42  
43  
44  
45  
46  
47  
48  
49  
50  
51  
52  
53  
54  
55  
56  
57  
58  
59  
60

1  
2  
3  
4  
5  
6  
7  
8  
9  
10  
11  
12  
13  
14  
15  
16  
17  
18  
19  
20  
21  
22  
23  
24  
25  
26  
27  
28  
29  
30  
31  
32  
33  
34  
35  
36  
37  
38  
39  
40  
41  
42  
43  
44  
45  
46



## Supplementary Material

**Table S1:** Baseline characteristics for derivation cohort stratified by complexity.

|                                                                                  | <b>Overall<br/>(N=1889)</b>           | <b>Non-<br/>complex<br/>(N=1326)</b> | <b>Complex<br/>(N=563)</b> |
|----------------------------------------------------------------------------------|---------------------------------------|--------------------------------------|----------------------------|
|                                                                                  | n (%) or median [interquartile range] |                                      |                            |
| <b>Age</b>                                                                       |                                       |                                      |                            |
| ≥ 80 years                                                                       | 447 (32)                              | 337 (35)                             | 110 (25)                   |
| 70 to 79 years                                                                   | 327 (23)                              | 218 (23)                             | 109 (24)                   |
| 60 to 69 years                                                                   | 239 (17)                              | 152 (16)                             | 87 (19)                    |
| < 60 years                                                                       | 391 (28)                              | 251 (26)                             | 140 (31)                   |
| Missing                                                                          | 3 (0.2)                               | 2 (0.2)                              | 1 (0.2)                    |
| <b>Gender</b>                                                                    |                                       |                                      |                            |
| Male                                                                             | 748 (53)                              | 494 (51)                             | 254 (57)                   |
| Female                                                                           | 656 (47)                              | 464 (48)                             | 192 (43)                   |
| Missing                                                                          | 3 (0.2)                               | 2 (0.2)                              | 1 (0.2)                    |
| <b>Living area<sup>1</sup></b>                                                   |                                       |                                      |                            |
| Urban                                                                            | 460 (33)                              | 335 (35)                             | 125 (28)                   |
| Rural                                                                            | 923 (66)                              | 606 (63)                             | 317 (71)                   |
| Missing                                                                          | 24 (2)                                | 19 (2)                               | 5 (1)                      |
| <b>Marital status</b>                                                            |                                       |                                      |                            |
| Single                                                                           | 477 (34)                              | 306 (32)                             | 171 (38)                   |
| Couple                                                                           | 673 (48)                              | 458 (48)                             | 215 (48)                   |
| Widowed                                                                          | 252 (18)                              | 193 (20)                             | 59 (13)                    |
| Missing                                                                          | 5 (0.4)                               | 3 (0.3)                              | 2 (0.4)                    |
| <b>Hospitalization within last 12 months</b>                                     | 480 (34)                              | 317 (33)                             | 163 (36)                   |
| <b>Medication<sup>2</sup></b>                                                    |                                       |                                      |                            |
| Antineoplastic and immunomodulating agents at admission                          | 43 (3)                                | 20 (2)                               | 23 (5)                     |
| Nervous system at admission                                                      | 1001 (71)                             | 666 (69)                             | 335 (75)                   |
| Systemic hormonal preparations, excluding sex hormones and insulins at discharge | 253 (18)                              | 163 (17)                             | 90 (20)                    |
| <b>High costs during hospitalization<sup>3</sup></b>                             |                                       |                                      |                            |
| For imaging procedures                                                           | 367 (26)                              | 179 (19)                             | 188 (42)                   |
| For laboratory analysis                                                          | 365 (26)                              | 147 (15)                             | 218 (49)                   |
| <b>High nurse workload<sup>4</sup></b>                                           | 358 (25)                              | 146 (15)                             | 212 (47)                   |
| <b>Charlson Comorbidity Index</b>                                                | 2 [0; 4]                              | 2 [0; 3]                             | 2.5 [1; 5]                 |
| <b>Principal or concomitant diagnosis at discharge</b>                           |                                       |                                      |                            |
| Cancer <sup>5</sup>                                                              | 175 (12)                              | 104 (11)                             | 71 (16)                    |
| COPD <sup>6</sup>                                                                | 139 (10)                              | 91 (9)                               | 48 (11)                    |
| Dementia <sup>7</sup>                                                            | 120 (8)                               | 89 (9)                               | 31 (7)                     |
| Depression <sup>8</sup>                                                          | 148 (10)                              | 94 (10)                              | 54 (12)                    |
| Heart failure <sup>9</sup>                                                       | 235 (17)                              | 143 (15)                             | 92 (21)                    |

<sup>1</sup> Defined according to the Swiss Federal Statistical Office based on place of residence

<sup>2</sup> Group of drugs according to ATC classification

<sup>3</sup> Defined as costs of all imaging procedures or medication during hospital stay above 75<sup>th</sup> percentile

<sup>4</sup> Defined as sum of hours of all nursing work (incl. sitting guard) during hospital stay above 75<sup>th</sup> percentile

<sup>5</sup> ICD10-codes B21, C00 through C97, Z03.1

<sup>6</sup> ICD10-codes J44

<sup>7</sup> ICD10-codes F00 through F03, F05.0, F05.1

<sup>8</sup> ICD10-codes F20.4, F25.1, F31.3 F31.4, F31.5, F32, F33, F41.2, F92.0

<sup>9</sup> ICD10-codes I50

|                                                        |          |          |          |
|--------------------------------------------------------|----------|----------|----------|
| Pneumonia <sup>10</sup>                                | 186 (13) | 115 (12) | 71 (16)  |
| Sepsis <sup>11</sup>                                   | 162 (11) | 88 (9)   | 74 (17)  |
| Stroke <sup>12</sup>                                   | 72 (5)   | 50 (5)   | 22 (5)   |
| Substance abuse <sup>13</sup>                          | 154 (11) | 90 (9)   | 64 (14)  |
| Syncope <sup>14</sup>                                  | 68 (5)   | 55 (6)   | 13 (3)   |
| Malnutrition <sup>15</sup>                             | 190 (13) | 82 (8)   | 108 (24) |
| <b>Multimorbidity</b>                                  |          |          |          |
| Low (number of diagnoses ≤ 6)                          | 387 (27) | 322 (33) | 65 (14)  |
| Middle (number of diagnoses > 6 and <14) <sup>16</sup> | 642 (46) | 443 (46) | 199 (44) |
| High (number of diagnoses ≥ 14)                        | 375 (27) | 193 (20) | 182 (41) |
| <b>PCCL</b>                                            |          |          |          |
| No complication or comorbidity                         | 297 (21) | 239 (25) | 58 (13)  |
| Light complication or comorbidity                      | 22 (2)   | 15 (2)   | 7 (2)    |
| Moderate complication or comorbidity                   | 211 (15) | 161 (17) | 50 (11)  |
| Severe complication or comorbidity                     | 390 (28) | 289 (30) | 101 (23) |
| Very severe complication or comorbidity                | 484 (34) | 254 (26) | 230 (51) |
| Missing                                                | 3 (0.2)  | 2 (0.2)  | 1 (0.2)  |
| <b>Abnormal creatinine level<sup>17</sup></b>          |          |          |          |
| At admission and discharge                             | 278 (20) | 181 (19) | 97 (22)  |
| At admission only                                      | 128 (9)  | 72 (7)   | 56 (12)  |
| At discharge only                                      | 50 (4)   | 24 (2)   | 26 (6)   |
| Missing                                                | 275 (19) | 229 (24) | 46 (10)  |
| <b>Leukocytosis<sup>18</sup></b>                       |          |          |          |
| At admission and discharge                             | 15 (1)   | 6 (0.6)  | 9 (2)    |
| At admission only                                      | 60 (4)   | 35 (4)   | 25 (6)   |
| At discharge only                                      | 11 (0.8) | 3 (0.3)  | 8 (2)    |
| Missing                                                | 260 (18) | 223 (23) | 37 (8)   |
| <b>Patient destination</b>                             |          |          |          |
| Death                                                  | 105 (7)  | 73 (8)   | 32 (7)   |
| Home                                                   | 875 (62) | 621 (65) | 254 (57) |
| Hospital                                               | 141 (10) | 85 (9)   | 56 (12)  |
| Nursing home                                           | 109 (8)  | 79 (8)   | 30 (7)   |
| Rehabilitation                                         | 138 (10) | 79 (8)   | 59 (13)  |
| Others and missing                                     | 39 (3)   | 23 (2)   | 16 (4)   |

**Table S2:** Baseline characteristics for all patients in the validation cohort stratified by complexity.

|            | <b>Overall<br/>(N=1889)</b>           | <b>Non-<br/>complex<br/>(N=1326)</b> | <b>Complex<br/>(N=563)</b> |
|------------|---------------------------------------|--------------------------------------|----------------------------|
|            | n (%) or median [interquartile range] |                                      |                            |
| <b>Age</b> |                                       |                                      |                            |
| ≥ 80 years | 132 (27)                              | 105 (29)                             | 27 (23)                    |

<sup>10</sup> ICD10-codes A48.1, B01.2, B05.2, J10.0, J11.0, J12 through J18, J68.0, J69, J85.1, O74.0, U69.00

<sup>11</sup> ICD10-codes A02.1, A20.7, A22.7, A26.7, A32.7, A39.2, A39.3, A39.4, A40, A41, A42.7, B37.7

<sup>12</sup> ICD10-codes I63

<sup>13</sup> ICD10-codes F10 through F19, F53, F66.8, F66.9

<sup>14</sup> ICD10-codes R55

<sup>15</sup> ICD10-codes E40 through E46

<sup>16</sup> Between 25<sup>th</sup> and 75<sup>th</sup> percentile

<sup>17</sup> Defined as creatinine ≥100 µmol/l

<sup>18</sup> Defined as leukocyte count ≥20 G/l

|                                                                                  |          |             |          |
|----------------------------------------------------------------------------------|----------|-------------|----------|
| 70 to 79 years                                                                   | 110 (23) | 86 (23)     | 24 (21)  |
| 60 to 69 years                                                                   | 83 (17)  | 59 (16)     | 24 (21)  |
| < 60 years                                                                       | 146 (30) | 112 (31)    | 34 (29)  |
| Missing                                                                          | 11 (2)   | 4 (1)       | 7 (6)    |
| <b>Gender</b>                                                                    |          |             |          |
| Male                                                                             | 254 (53) | 199 (54)    | 55 (47)  |
| Female                                                                           | 217 (45) | 163 (44)    | 54 (47)  |
| Missing                                                                          | 11 (2)   | 4 (1)       | 7 (6)    |
| <b>Living area<sup>1</sup></b>                                                   |          |             |          |
| Urban                                                                            | 151 (31) | 118 (32)    | 33 (28)  |
| Rural                                                                            | 315 (65) | 242 (66)    | 73 (63)  |
| Missing                                                                          | 16 (3)   | 6 (2)       | 10 (9)   |
| <b>Marital status</b>                                                            |          |             |          |
| Single                                                                           | 159 (33) | 123 (34)    | 36 (31)  |
| Couple                                                                           | 243 (50) | 183 (50)    | 60 (52)  |
| Widowed                                                                          | 79 (16)  | 59 (16)     | 20 (17)  |
| Missing                                                                          | 1 (0.2)  | 1 (0.3)     | 0 (0)    |
| <b>Hospitalization within last 12 months</b>                                     | 193 (40) | 135 (37)    | 58 (50)  |
| <b>Medication<sup>2</sup></b>                                                    |          |             |          |
| Antineoplastic and immunomodulating agents at admission                          | 27 (6)   | 18 (5)      | 9 (8)    |
| Nervous system at admission                                                      | 339 (70) | 252 (69)    | 87 (75)  |
| Systemic hormonal preparations, excluding sex hormones and insulins at discharge | 105 (22) | 73 (20)     | 32 (28)  |
| <b>High costs during hospitalization<sup>3</sup></b>                             |          |             |          |
| For imaging procedures                                                           | 118 (24) | 76 (21)     | 42 (36)  |
| For laboratory analysis                                                          | 117 (24) | 56 (15)     | 61 (53)  |
| <b>High nurse workload<sup>4</sup></b>                                           | 117 (24) | 57 (15.6)   | 60 (52)  |
| <b>Charlson Comorbidity Index</b>                                                | 2 [0; 4] | 2.00 [0; 3] | 3 [1; 5] |
| <b>Principal or concomitant diagnosis at discharge</b>                           |          |             |          |
| Cancer <sup>5</sup>                                                              | 50 (10)  | 50 (10)     | 50 (10)  |
| COPD <sup>6</sup>                                                                | 32 (9)   | 32 (8)      | 32 (9)   |
| Dementia <sup>7</sup>                                                            | 18 (15)  | 18 (15)     | 18 (15)  |
| Depression <sup>8</sup>                                                          | 47 (10)  | 47 (10)     | 47 (10)  |
| Heart failure <sup>9</sup>                                                       | 33 (9)   | 33 (9)      | 33 (9)   |
| Pneumonia <sup>10</sup>                                                          | 14 (12)  | 14 (12)     | 14 (12)  |
| Sepsis <sup>11</sup>                                                             | 43 (9)   | 43 (9)      | 43 (9)   |
| Stroke <sup>12</sup>                                                             | 36 (10)  | 36 (9)      | 36 (10)  |
| Substance abuse <sup>13</sup>                                                    | 7 (6)    | 7 (6)       | 7 (6)    |
| Syncope <sup>14</sup>                                                            | 61 (13)  | 61 (13)     | 61 (13)  |

<sup>1</sup> Defined according to the Swiss Federal Statistical Office based on place of residence

<sup>2</sup> Group of drugs according to ATC classification

<sup>3</sup> Defined as costs of all imaging procedures or medication during hospital stay above 75<sup>th</sup> percentile

<sup>4</sup> Defined as sum of hours of all nursing work (incl. sitting guard) during hospital stay above 75<sup>th</sup> percentile

<sup>5</sup> ICD10-codes B21, C00 through C97, Z03.1

<sup>6</sup> ICD10-codes J44

<sup>7</sup> ICD10-codes F00 through F03, F05.0, F05.1

<sup>8</sup> ICD10-codes F20.4, F25.1, F31.3 F31.4, F31.5, F32, F33, F41.2, F92.0

<sup>9</sup> ICD10-codes I50

<sup>10</sup> ICD10-codes A48.1, B01.2, B05.2, J10.0, J11.0, J12 through J18, J68.0, J69, J85.1, O74.0, U69.00

<sup>11</sup> ICD10-codes A02.1, A20.7, A22.7, A26.7, A32.7, A39.2, A39.3, A39.4, A40, A41, A42.7, B37.7

<sup>12</sup> ICD10-codes I63

<sup>13</sup> ICD10-codes F10 through F19, F53, F66.8, F66.9

<sup>14</sup> ICD10-codes R55



|                                                        |           |          |          |
|--------------------------------------------------------|-----------|----------|----------|
| Malnutrition <sup>15</sup>                             | 46 (13)   | 46 (13)  | 46 (13)  |
| <b>Multimorbidity</b>                                  |           |          |          |
| Low (number of diagnoses ≤ 6)                          | 123 (25)  | 113 (31) | 10 (9)   |
| Middle (number of diagnoses > 6 and <14) <sup>16</sup> | 199 (41)  | 160 (44) | 39 (34)  |
| High (number of diagnoses ≥ 14)                        | 149 (31)  | 89 (24)  | 60 (52)  |
| <b>PCCL</b>                                            |           |          |          |
| No complication or comorbidity                         | 83 (1)    | 73 (20)  | 10 (9)   |
| Light complication or comorbidity                      | 7 (1)     | 6 (2)    | 1 (0.9)  |
| Moderate complication or comorbidity                   | 81 (17)   | 72 (20)  | 9 (8)    |
| Severe complication or comorbidity                     | 143 (30)  | 120 (33) | 23 (20)  |
| Very severe complication or comorbidity                | 157 (33)  | 91 (24)  | 66 (57)  |
| Missing                                                | 11 (2)    | 4 (1)    | 7 (6)    |
| <b>Abnormal creatinine level<sup>17</sup></b>          |           |          |          |
| At admission and discharge                             | 90 (19)   | 60 (16)  | 30 (26)  |
| At admission only                                      | 54 (11)   | 34 (9)   | 20 (17)  |
| At discharge only                                      | 13 (2.7)  | 10 (3)   | 3 (3)    |
| Missing                                                | 89 (18)   | 82 (22)  | 7 (6)    |
| <b>Leukocytosis<sup>18</sup></b>                       |           |          |          |
| At admission and discharge                             | 4 (0.8)   | 2 (0)    | 2 (2)    |
| At admission only                                      | 17 (3)    | 12 (3)   | 5 (4)    |
| At discharge only                                      | 2 (0.4)   | 2 (0.5)  | 0 (0)    |
| Missing                                                | 91 (19)   | 83 (23)  | 8 (7)    |
| <b>Patient destination</b>                             |           |          |          |
| Death                                                  | 134 (7)   | 91 (7)   | 43 (8)   |
| Home                                                   | 1178 (62) | 873 (66) | 305 (54) |
| Hospital                                               | 191 (10)  | 119 (9)  | 72 (13)  |
| Nursing home                                           | 155 (8)   | 108 (8)  | 47 (8)   |
| Rehabilitation                                         | 171 (9)   | 101 (8)  | 70 (12)  |
| Others and missing                                     | 60 (3)    | 34 (3)   | 26 (5)   |

<sup>15</sup> ICD10-codes E40 through E46

<sup>16</sup> Between 25<sup>th</sup> and 75<sup>th</sup> percentile

<sup>17</sup> Defined as creatinine ≥100 µmol/l

<sup>18</sup> Defined as leukocyte count ≥20 G/l

Supplementary figure S1. Decision curve analysis. A, derivation dataset. B, validation dataset.

CCI, Charlson comorbidity index.

A)



B)

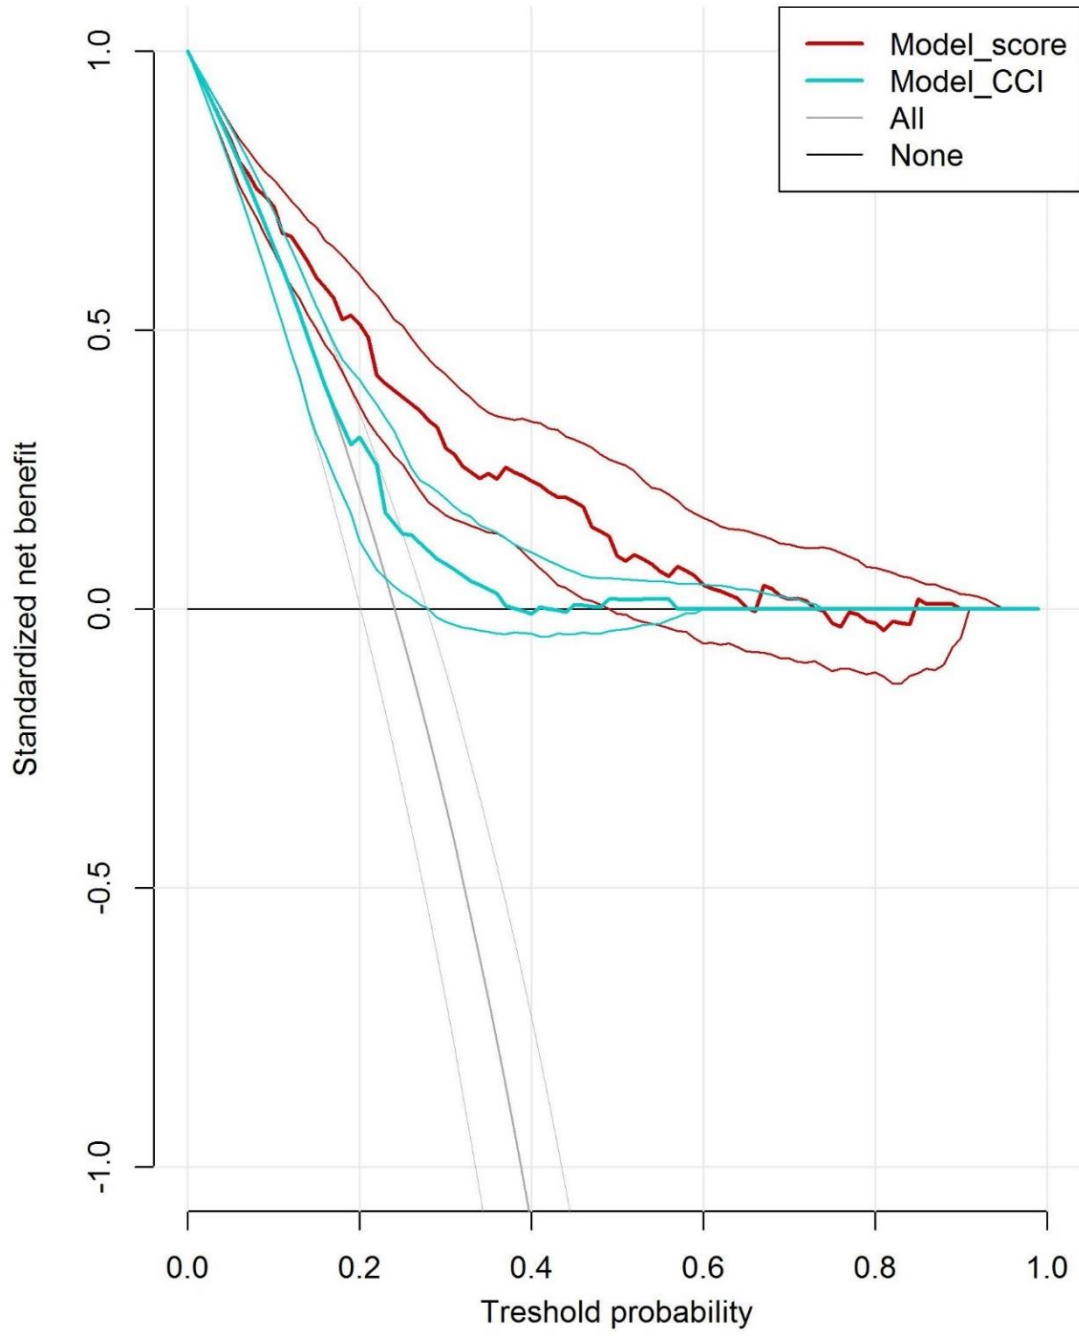

1  
2  
3 **Supplementary figure S2.** A, PCA score, derivation dataset. B, PCA score, validation dataset.  
4  
5 C, PCCL, derivation dataset. D, PCCL, validation dataset. E, CCI, derivation dataset. F, CCI,  
6  
7 validation dataset.  
8  
9  
10  
11  
12  
13

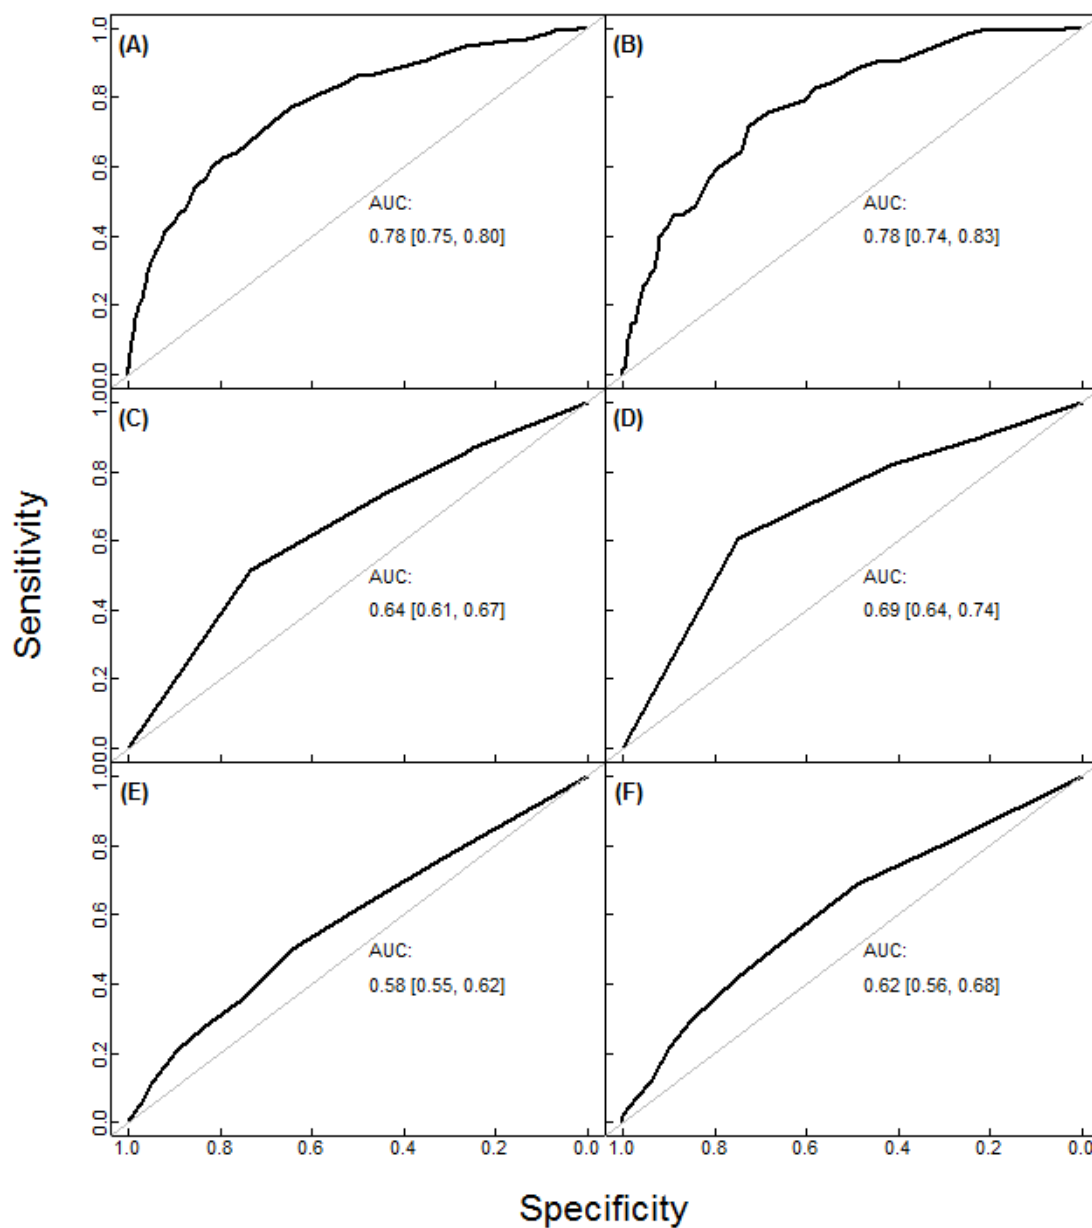

# Reporting checklist for prediction model development and validation study.

Based on the TRIPOD guidelines.

## Instructions to authors

Complete this checklist by entering the page numbers from your manuscript where readers will find each of the items listed below.

Your article may not currently address all the items on the checklist. Please modify your text to include the missing information. If you are certain that an item does not apply, please write "n/a" and provide a short explanation.

Upload your completed checklist as an extra file when you submit to a journal.

In your methods section, say that you used the TRIPOD reporting guidelines, and cite them as:

Collins GS, Reitsma JB, Altman DG, Moons KG. Transparent reporting of a multivariable prediction model for individual prognosis or diagnosis (TRIPOD): The TRIPOD statement.

|              | Reporting Item                                                                                                                                                    | Page Number |
|--------------|-------------------------------------------------------------------------------------------------------------------------------------------------------------------|-------------|
| <b>Title</b> |                                                                                                                                                                   |             |
|              | <a href="#">#1</a> Identify the study as developing and / or validating a multivariable prediction model, the target population, and the outcome to be predicted. | 1           |

## Abstract

|    |                     |                                                                 |     |
|----|---------------------|-----------------------------------------------------------------|-----|
| 1  |                     |                                                                 |     |
| 2  |                     | <a href="#">#2</a>                                              | 3   |
| 3  |                     |                                                                 |     |
| 4  |                     | Provide a summary of objectives, study design, setting,         |     |
| 5  |                     | participants, sample size, predictors, outcome, statistical     |     |
| 6  |                     | analysis, results, and conclusions.                             |     |
| 7  |                     |                                                                 |     |
| 8  |                     |                                                                 |     |
| 9  | <b>Introduction</b> |                                                                 |     |
| 10 |                     |                                                                 |     |
| 11 |                     |                                                                 |     |
| 12 |                     | <a href="#">#3a</a>                                             | 5   |
| 13 |                     | Explain the medical context (including whether diagnostic or    |     |
| 14 |                     | prognostic) and rationale for developing or validating the      |     |
| 15 |                     | multivariable prediction model, including references to         |     |
| 16 |                     | existing models.                                                |     |
| 17 |                     |                                                                 |     |
| 18 |                     |                                                                 |     |
| 19 |                     |                                                                 |     |
| 20 |                     |                                                                 |     |
| 21 |                     |                                                                 |     |
| 22 |                     | <a href="#">#3b</a>                                             | 5   |
| 23 |                     | Specify the objectives, including whether the study describes   |     |
| 24 |                     | the development or validation of the model or both.             |     |
| 25 |                     |                                                                 |     |
| 26 |                     |                                                                 |     |
| 27 | <b>Methods</b>      |                                                                 |     |
| 28 |                     |                                                                 |     |
| 29 |                     |                                                                 |     |
| 30 | Source of data      | <a href="#">#4a</a>                                             | 6   |
| 31 |                     | Describe the study design or source of data (e.g.,              |     |
| 32 |                     | randomized trial, cohort, or registry data), separately for the |     |
| 33 |                     | development and validation data sets, if applicable.            |     |
| 34 |                     |                                                                 |     |
| 35 |                     |                                                                 |     |
| 36 |                     |                                                                 |     |
| 37 |                     |                                                                 |     |
| 38 | Source of data      | <a href="#">#4b</a>                                             | 6   |
| 39 |                     | Specify the key study dates, including start of accrual; end of |     |
| 40 |                     | accrual; and, if applicable, end of follow-up.                  |     |
| 41 |                     |                                                                 |     |
| 42 |                     |                                                                 |     |
| 43 | Participants        | <a href="#">#5a</a>                                             | 6   |
| 44 |                     | Specify key elements of the study setting (e.g., primary care,  |     |
| 45 |                     | secondary care, general population) including number and        |     |
| 46 |                     | location of centres.                                            |     |
| 47 |                     |                                                                 |     |
| 48 |                     |                                                                 |     |
| 49 |                     |                                                                 |     |
| 50 |                     |                                                                 |     |
| 51 | Participants        | <a href="#">#5b</a>                                             | 6   |
| 52 |                     | Describe eligibility criteria for participants.                 |     |
| 53 |                     |                                                                 |     |
| 54 | Participants        | <a href="#">#5c</a>                                             | n/a |
| 55 |                     | Give details of treatments received, if relevant                |     |
| 56 |                     |                                                                 |     |
| 57 |                     |                                                                 |     |
| 58 |                     |                                                                 |     |
| 59 |                     |                                                                 |     |
| 60 |                     |                                                                 |     |

|    |                  |                      |                                                                                                                                                                         |     |
|----|------------------|----------------------|-------------------------------------------------------------------------------------------------------------------------------------------------------------------------|-----|
| 1  | Outcome          | <a href="#">#6a</a>  | Clearly define the outcome that is predicted by the prediction model, including how and when assessed.                                                                  | 6   |
| 2  |                  |                      |                                                                                                                                                                         |     |
| 3  |                  |                      |                                                                                                                                                                         |     |
| 4  |                  |                      |                                                                                                                                                                         |     |
| 5  |                  |                      |                                                                                                                                                                         |     |
| 6  | Outcome          | <a href="#">#6b</a>  | Report any actions to blind assessment of the outcome to be predicted.                                                                                                  | n/a |
| 7  |                  |                      |                                                                                                                                                                         |     |
| 8  |                  |                      |                                                                                                                                                                         |     |
| 9  |                  |                      |                                                                                                                                                                         |     |
| 10 |                  |                      |                                                                                                                                                                         |     |
| 11 | Predictors       | <a href="#">#7a</a>  | Clearly define all predictors used in developing or validating the multivariable prediction model, including how and when they were measured                            | 7   |
| 12 |                  |                      |                                                                                                                                                                         |     |
| 13 |                  |                      |                                                                                                                                                                         |     |
| 14 |                  |                      |                                                                                                                                                                         |     |
| 15 |                  |                      |                                                                                                                                                                         |     |
| 16 |                  |                      |                                                                                                                                                                         |     |
| 17 |                  |                      |                                                                                                                                                                         |     |
| 18 |                  |                      |                                                                                                                                                                         |     |
| 19 | Predictors       | <a href="#">#7b</a>  | Report any actions to blind assessment of predictors for the outcome and other predictors.                                                                              | n/a |
| 20 |                  |                      |                                                                                                                                                                         |     |
| 21 |                  |                      |                                                                                                                                                                         |     |
| 22 |                  |                      |                                                                                                                                                                         |     |
| 23 |                  |                      |                                                                                                                                                                         |     |
| 24 |                  |                      |                                                                                                                                                                         |     |
| 25 | Sample size      | <a href="#">#8</a>   | Explain how the study size was arrived at.                                                                                                                              | 6   |
| 26 |                  |                      |                                                                                                                                                                         |     |
| 27 |                  |                      |                                                                                                                                                                         |     |
| 28 | Missing data     | <a href="#">#9</a>   | Describe how missing data were handled (e.g., complete-case analysis, single imputation, multiple imputation) with details of any imputation method.                    | 8-9 |
| 29 |                  |                      |                                                                                                                                                                         |     |
| 30 |                  |                      |                                                                                                                                                                         |     |
| 31 |                  |                      |                                                                                                                                                                         |     |
| 32 |                  |                      |                                                                                                                                                                         |     |
| 33 |                  |                      |                                                                                                                                                                         |     |
| 34 |                  |                      |                                                                                                                                                                         |     |
| 35 | Statistical      | <a href="#">#10a</a> | If you are developing a prediction model describe how predictors were handled in the analyses.                                                                          | 8-9 |
| 36 |                  |                      |                                                                                                                                                                         |     |
| 37 | analysis methods |                      |                                                                                                                                                                         |     |
| 38 |                  |                      |                                                                                                                                                                         |     |
| 39 |                  |                      |                                                                                                                                                                         |     |
| 40 |                  |                      |                                                                                                                                                                         |     |
| 41 | Statistical      | <a href="#">#10b</a> | If you are developing a prediction model, specify type of model, all model-building procedures (including any predictor selection), and method for internal validation. | 8-9 |
| 42 |                  |                      |                                                                                                                                                                         |     |
| 43 | analysis methods |                      |                                                                                                                                                                         |     |
| 44 |                  |                      |                                                                                                                                                                         |     |
| 45 |                  |                      |                                                                                                                                                                         |     |
| 46 |                  |                      |                                                                                                                                                                         |     |
| 47 |                  |                      |                                                                                                                                                                         |     |
| 48 | Statistical      | <a href="#">#10c</a> | If you are validating a prediction model, describe how the predictions were calculated.                                                                                 | 8-9 |
| 49 |                  |                      |                                                                                                                                                                         |     |
| 50 | analysis methods |                      |                                                                                                                                                                         |     |
| 51 |                  |                      |                                                                                                                                                                         |     |
| 52 |                  |                      |                                                                                                                                                                         |     |
| 53 |                  |                      |                                                                                                                                                                         |     |
| 54 | Statistical      | <a href="#">#10d</a> | Specify all measures used to assess model performance and, if relevant, to compare multiple models.                                                                     | 8-9 |
| 55 |                  |                      |                                                                                                                                                                         |     |
| 56 | analysis methods |                      |                                                                                                                                                                         |     |
| 57 |                  |                      |                                                                                                                                                                         |     |
| 58 |                  |                      |                                                                                                                                                                         |     |
| 59 |                  |                      |                                                                                                                                                                         |     |
| 60 |                  |                      |                                                                                                                                                                         |     |

|    |                  |                      |                                                                 |        |
|----|------------------|----------------------|-----------------------------------------------------------------|--------|
| 1  | Statistical      | <a href="#">#10e</a> | If you are validating a prediction model, describe any model    | 8-9    |
| 2  |                  |                      |                                                                 |        |
| 3  | analysis methods |                      | updating (e.g., recalibration) arising from the validation, if  |        |
| 4  |                  |                      | done                                                            |        |
| 5  |                  |                      |                                                                 |        |
| 6  |                  |                      |                                                                 |        |
| 7  |                  |                      |                                                                 |        |
| 8  |                  |                      |                                                                 |        |
| 9  | Risk groups      | <a href="#">#11</a>  | Provide details on how risk groups were created, if done.       | n/a    |
| 10 |                  |                      |                                                                 |        |
| 11 |                  |                      |                                                                 |        |
| 12 | Development vs.  | <a href="#">#12</a>  | For validation, identify any differences from the development   | 8-9    |
| 13 | validation       |                      | data in setting, eligibility criteria, outcome, and predictors. |        |
| 14 |                  |                      |                                                                 |        |
| 15 |                  |                      |                                                                 |        |
| 16 |                  |                      |                                                                 |        |
| 17 | <b>Results</b>   |                      |                                                                 |        |
| 18 |                  |                      |                                                                 |        |
| 19 |                  |                      |                                                                 |        |
| 20 | Participants     | <a href="#">#13a</a> | Describe the flow of participants through the study, including  | 9 + 24 |
| 21 |                  |                      | the number of participants with and without the outcome         |        |
| 22 |                  |                      | and, if applicable, a summary of the follow-up time. A          |        |
| 23 |                  |                      | diagram may be helpful.                                         |        |
| 24 |                  |                      |                                                                 |        |
| 25 |                  |                      |                                                                 |        |
| 26 |                  |                      |                                                                 |        |
| 27 |                  |                      |                                                                 |        |
| 28 |                  |                      |                                                                 |        |
| 29 |                  |                      |                                                                 |        |
| 30 | Participants     | <a href="#">#13b</a> | Describe the characteristics of the participants (basic         | 9 + 18 |
| 31 |                  |                      | demographics, clinical features, available predictors),         |        |
| 32 |                  |                      | including the number of participants with missing data for      |        |
| 33 |                  |                      | predictors and outcome.                                         |        |
| 34 |                  |                      |                                                                 |        |
| 35 |                  |                      |                                                                 |        |
| 36 |                  |                      |                                                                 |        |
| 37 |                  |                      |                                                                 |        |
| 38 |                  |                      |                                                                 |        |
| 39 |                  |                      |                                                                 |        |
| 40 | Participants     | <a href="#">#13c</a> | For validation, show a comparison with the development          | 9 + 18 |
| 41 |                  |                      | data of the distribution of important variables (demographics,  |        |
| 42 |                  |                      | predictors and outcome).                                        |        |
| 43 |                  |                      |                                                                 |        |
| 44 |                  |                      |                                                                 |        |
| 45 |                  |                      |                                                                 |        |
| 46 |                  |                      |                                                                 |        |
| 47 |                  |                      |                                                                 |        |
| 48 | Model            | <a href="#">#14a</a> | If developing a model, specify the number of participants       | 9      |
| 49 |                  |                      | and outcome events in each analysis.                            |        |
| 50 | development      |                      |                                                                 |        |
| 51 |                  |                      |                                                                 |        |
| 52 |                  |                      |                                                                 |        |
| 53 | Model            | <a href="#">#14b</a> | If developing a model, report the unadjusted association, if    | 9      |
| 54 |                  |                      | calculated between each candidate predictor and outcome.        |        |
| 55 | development      |                      |                                                                 |        |
| 56 |                  |                      |                                                                 |        |
| 57 |                  |                      |                                                                 |        |
| 58 |                  |                      |                                                                 |        |
| 59 |                  |                      |                                                                 |        |
| 60 |                  |                      |                                                                 |        |



|    |                   |                      |                                                                  |         |
|----|-------------------|----------------------|------------------------------------------------------------------|---------|
| 1  | Model             | <a href="#">#15a</a> | If developing a model, present the full prediction model to      | 9 + 21  |
| 2  |                   |                      |                                                                  |         |
| 3  | specification     |                      | allow predictions for individuals (i.e., all regression          |         |
| 4  |                   |                      | coefficients, and model intercept or baseline survival at a      |         |
| 5  |                   |                      | given time point).                                               |         |
| 6  |                   |                      |                                                                  |         |
| 7  |                   |                      |                                                                  |         |
| 8  |                   |                      |                                                                  |         |
| 9  |                   |                      |                                                                  |         |
| 10 |                   |                      |                                                                  |         |
| 11 | Model             | <a href="#">#15b</a> | If developing a prediction model, explain how to the use it.     | 10 + 21 |
| 12 |                   |                      |                                                                  |         |
| 13 | specification     |                      |                                                                  |         |
| 14 |                   |                      |                                                                  |         |
| 15 |                   |                      |                                                                  |         |
| 16 | Model             | <a href="#">#16</a>  | Report performance measures (with CIs) for the prediction        | 10, 11, |
| 17 |                   |                      | model.                                                           | 23      |
| 18 | performance       |                      |                                                                  |         |
| 19 |                   |                      |                                                                  |         |
| 20 |                   |                      |                                                                  |         |
| 21 |                   |                      |                                                                  |         |
| 22 | Model-updating    | <a href="#">#17</a>  | If validating a model, report the results from any model         | 10-11   |
| 23 |                   |                      | updating, if done (i.e., model specification, model              |         |
| 24 |                   |                      | performance).                                                    |         |
| 25 |                   |                      |                                                                  |         |
| 26 |                   |                      |                                                                  |         |
| 27 |                   |                      |                                                                  |         |
| 28 |                   |                      |                                                                  |         |
| 29 | <b>Discussion</b> |                      |                                                                  |         |
| 30 |                   |                      |                                                                  |         |
| 31 |                   |                      |                                                                  |         |
| 32 | Limitations       | <a href="#">#18</a>  | Discuss any limitations of the study (such as                    | 14      |
| 33 |                   |                      | nonrepresentative sample, few events per predictor, missing      |         |
| 34 |                   |                      | data).                                                           |         |
| 35 |                   |                      |                                                                  |         |
| 36 |                   |                      |                                                                  |         |
| 37 |                   |                      |                                                                  |         |
| 38 |                   |                      |                                                                  |         |
| 39 |                   |                      |                                                                  |         |
| 40 | Interpretation    | <a href="#">#19a</a> | For validation, discuss the results with reference to            | 11-14   |
| 41 |                   |                      | performance in the development data, and any other               |         |
| 42 |                   |                      | validation data                                                  |         |
| 43 |                   |                      |                                                                  |         |
| 44 |                   |                      |                                                                  |         |
| 45 |                   |                      |                                                                  |         |
| 46 |                   |                      |                                                                  |         |
| 47 | Interpretation    | <a href="#">#19b</a> | Give an overall interpretation of the results, considering       | 11-14   |
| 48 |                   |                      | objectives, limitations, results from similar studies, and other |         |
| 49 |                   |                      | relevant evidence.                                               |         |
| 50 |                   |                      |                                                                  |         |
| 51 |                   |                      |                                                                  |         |
| 52 |                   |                      |                                                                  |         |
| 53 |                   |                      |                                                                  |         |
| 54 |                   |                      |                                                                  |         |
| 55 | Implications      | <a href="#">#20</a>  | Discuss the potential clinical use of the model and              | 14      |
| 56 |                   |                      | implications for future research                                 |         |
| 57 |                   |                      |                                                                  |         |
| 58 |                   |                      |                                                                  |         |
| 59 |                   |                      |                                                                  |         |
| 60 |                   |                      |                                                                  |         |

## Other information

|                           |                     |                                                                                                                               |    |
|---------------------------|---------------------|-------------------------------------------------------------------------------------------------------------------------------|----|
| Supplementary information | <a href="#">#21</a> | Provide information about the availability of supplementary resources, such as study protocol, Web calculator, and data sets. | 25 |
| Funding                   | <a href="#">#22</a> | Give the source of funding and the role of the funders for the present study.                                                 | 2  |

The TRIPOD checklist is distributed under the terms of the Creative Commons Attribution License CC-BY. This checklist was completed on 30. May 2020 using <https://www.goodreports.org/>, a tool made by the [EQUATOR Network](#) in collaboration with [Penelope.ai](#)
