# Supplementary material for: Development and validation of a score to assess complexity of general internal medicine patients at hospital discharge: a prospective cohort study
Source: PubMed Central journal article supplement — BMJ Open. 2021 May 6;11(5):e041205. doi: 10.1136/bmjopen-2020-041205 (PMC8103941; doi:10.1136/bmjopen-2020-041205), 2021-05-06
Supplement: bmjopen-2020-041205supp001.pdf [file bmjopen-2020-041205supp001.pdf]

## Supplementary Material

**Table S1:** Baseline characteristics for derivation cohort stratified by complexity.

|                                                                                  | Overall<br>(N=1889)                   | Non-<br>complex<br>(N=1326) | Complex<br>(N=563) |
|----------------------------------------------------------------------------------|---------------------------------------|-----------------------------|--------------------|
|                                                                                  | n (%) or median [interquartile range] |                             |                    |
| <b>Age</b>                                                                       |                                       |                             |                    |
| ≥ 80 years                                                                       | 447 (32)                              | 337 (35)                    | 110 (25)           |
| 70 to 79 years                                                                   | 327 (23)                              | 218 (23)                    | 109 (24)           |
| 60 to 69 years                                                                   | 239 (17)                              | 152 (16)                    | 87 (19)            |
| < 60 years                                                                       | 391 (28)                              | 251 (26)                    | 140 (31)           |
| Missing                                                                          | 3 (0.2)                               | 2 (0.2)                     | 1 (0.2)            |
| <b>Gender</b>                                                                    |                                       |                             |                    |
| Male                                                                             | 748 (53)                              | 494 (51)                    | 254 (57)           |
| Female                                                                           | 656 (47)                              | 464 (48)                    | 192 (43)           |
| Missing                                                                          | 3 (0.2)                               | 2 (0.2)                     | 1 (0.2)            |
| <b>Living area<sup>1</sup></b>                                                   |                                       |                             |                    |
| Urban                                                                            | 460 (33)                              | 335 (35)                    | 125 (28)           |
| Rural                                                                            | 923 (66)                              | 606 (63)                    | 317 (71)           |
| Missing                                                                          | 24 (2)                                | 19 (2)                      | 5 (1)              |
| <b>Marital status</b>                                                            |                                       |                             |                    |
| Single                                                                           | 477 (34)                              | 306 (32)                    | 171 (38)           |
| Couple                                                                           | 673 (48)                              | 458 (48)                    | 215 (48)           |
| Widowed                                                                          | 252 (18)                              | 193 (20)                    | 59 (13)            |
| Missing                                                                          | 5 (0.4)                               | 3 (0.3)                     | 2 (0.4)            |
| <b>Hospitalization within last 12 months</b>                                     | 480 (34)                              | 317 (33)                    | 163 (36)           |
| <b>Medication<sup>2</sup></b>                                                    |                                       |                             |                    |
| Antineoplastic and immunomodulating agents at admission                          | 43 (3)                                | 20 (2)                      | 23 (5)             |
| Nervous system at admission                                                      | 1001 (71)                             | 666 (69)                    | 335 (75)           |
| Systemic hormonal preparations, excluding sex hormones and insulins at discharge | 253 (18)                              | 163 (17)                    | 90 (20)            |
| <b>High costs during hospitalization<sup>3</sup></b>                             |                                       |                             |                    |
| For imaging procedures                                                           | 367 (26)                              | 179 (19)                    | 188 (42)           |
| For laboratory analysis                                                          | 365 (26)                              | 147 (15)                    | 218 (49)           |
| <b>High nurse workload<sup>4</sup></b>                                           | 358 (25)                              | 146 (15)                    | 212 (47)           |
| <b>Charlson Comorbidity Index</b>                                                | 2 [0; 4]                              | 2 [0; 3]                    | 2.5 [1; 5]         |
| <b>Principal or concomitant diagnosis at discharge</b>                           |                                       |                             |                    |
| Cancer <sup>5</sup>                                                              | 175 (12)                              | 104 (11)                    | 71 (16)            |
| COPD <sup>6</sup>                                                                | 139 (10)                              | 91 (9)                      | 48 (11)            |
| Dementia <sup>7</sup>                                                            | 120 (8)                               | 89 (9)                      | 31 (7)             |
| Depression <sup>8</sup>                                                          | 148 (10)                              | 94 (10)                     | 54 (12)            |
| Heart failure <sup>9</sup>                                                       | 235 (17)                              | 143 (15)                    | 92 (21)            |

<sup>1</sup> Defined according to the Swiss Federal Statistical Office based on place of residence

<sup>2</sup> Group of drugs according to ATC classification

<sup>3</sup> Defined as costs of all imaging procedures or medication during hospital stay above 75<sup>th</sup> percentile

<sup>4</sup> Defined as sum of hours of all nursing work (incl. sitting guard) during hospital stay above 75<sup>th</sup> percentile

<sup>5</sup> ICD10-codes B21, C00 through C97, Z03.1

<sup>6</sup> ICD10-codes J44

<sup>7</sup> ICD10-codes F00 through F03, F05.0, F05.1

<sup>8</sup> ICD10-codes F20.4, F25.1, F31.3 F31.4, F31.5, F32, F33, F41.2, F92.0

<sup>9</sup> ICD10-codes I50

|                                                        |          |          |          |
|--------------------------------------------------------|----------|----------|----------|
| Pneumonia <sup>10</sup>                                | 186 (13) | 115 (12) | 71 (16)  |
| Sepsis <sup>11</sup>                                   | 162 (11) | 88 (9)   | 74 (17)  |
| Stroke <sup>12</sup>                                   | 72 (5)   | 50 (5)   | 22 (5)   |
| Substance abuse <sup>13</sup>                          | 154 (11) | 90 (9)   | 64 (14)  |
| Syncope <sup>14</sup>                                  | 68 (5)   | 55 (6)   | 13 (3)   |
| Malnutrition <sup>15</sup>                             | 190 (13) | 82 (8)   | 108 (24) |
| <b>Multimorbidity</b>                                  |          |          |          |
| Low (number of diagnoses ≤ 6)                          | 387 (27) | 322 (33) | 65 (14)  |
| Middle (number of diagnoses > 6 and <14) <sup>16</sup> | 642 (46) | 443 (46) | 199 (44) |
| High (number of diagnoses ≥ 14)                        | 375 (27) | 193 (20) | 182 (41) |
| <b>PCCL</b>                                            |          |          |          |
| No complication or comorbidity                         | 297 (21) | 239 (25) | 58 (13)  |
| Light complication or comorbidity                      | 22 (2)   | 15 (2)   | 7 (2)    |
| Moderate complication or comorbidity                   | 211 (15) | 161 (17) | 50 (11)  |
| Severe complication or comorbidity                     | 390 (28) | 289 (30) | 101 (23) |
| Very severe complication or comorbidity                | 484 (34) | 254 (26) | 230 (51) |
| Missing                                                | 3 (0.2)  | 2 (0.2)  | 1 (0.2)  |
| <b>Abnormal creatinine level<sup>17</sup></b>          |          |          |          |
| At admission and discharge                             | 278 (20) | 181 (19) | 97 (22)  |
| At admission only                                      | 128 (9)  | 72 (7)   | 56 (12)  |
| At discharge only                                      | 50 (4)   | 24 (2)   | 26 (6)   |
| Missing                                                | 275 (19) | 229 (24) | 46 (10)  |
| <b>Leukocytosis<sup>18</sup></b>                       |          |          |          |
| At admission and discharge                             | 15 (1)   | 6 (0.6)  | 9 (2)    |
| At admission only                                      | 60 (4)   | 35 (4)   | 25 (6)   |
| At discharge only                                      | 11 (0.8) | 3 (0.3)  | 8 (2)    |
| Missing                                                | 260 (18) | 223 (23) | 37 (8)   |
| <b>Patient destination</b>                             |          |          |          |
| Death                                                  | 105 (7)  | 73 (8)   | 32 (7)   |
| Home                                                   | 875 (62) | 621 (65) | 254 (57) |
| Hospital                                               | 141 (10) | 85 (9)   | 56 (12)  |
| Nursing home                                           | 109 (8)  | 79 (8)   | 30 (7)   |
| Rehabilitation                                         | 138 (10) | 79 (8)   | 59 (13)  |
| Others and missing                                     | 39 (3)   | 23 (2)   | 16 (4)   |

**Table S2:** Baseline characteristics for all patients in the validation cohort stratified by complexity.

|            | <b>Overall<br/>(N=1889)</b>           | <b>Non-<br/>complex<br/>(N=1326)</b> | <b>Complex<br/>(N=563)</b> |
|------------|---------------------------------------|--------------------------------------|----------------------------|
|            | n (%) or median [interquartile range] |                                      |                            |
| <b>Age</b> |                                       |                                      |                            |
| ≥ 80 years | 132 (27)                              | 105 (29)                             | 27 (23)                    |

<sup>10</sup> ICD10-codes A48.1, B01.2, B05.2, J10.0, J11.0, J12 through J18, J68.0, J69, J85.1, O74.0, U69.00

<sup>11</sup> ICD10-codes A02.1, A20.7, A22.7, A26.7, A32.7, A39.2, A39.3, A39.4, A40, A41, A42.7, B37.7

<sup>12</sup> ICD10-codes I63

<sup>13</sup> ICD10-codes F10 through F19, F53, F66.8, F66.9

<sup>14</sup> ICD10-codes R55

<sup>15</sup> ICD10-codes E40 through E46

<sup>16</sup> Between 25<sup>th</sup> and 75<sup>th</sup> percentile

<sup>17</sup> Defined as creatinine ≥100 µmol/l

<sup>18</sup> Defined as leukocyte count ≥20 G/l

|                                                                                  |          |             |          |
|----------------------------------------------------------------------------------|----------|-------------|----------|
| 70 to 79 years                                                                   | 110 (23) | 86 (23)     | 24 (21)  |
| 60 to 69 years                                                                   | 83 (17)  | 59 (16)     | 24 (21)  |
| < 60 years                                                                       | 146 (30) | 112 (31)    | 34 (29)  |
| Missing                                                                          | 11 (2)   | 4 (1)       | 7 (6)    |
| <b>Gender</b>                                                                    |          |             |          |
| Male                                                                             | 254 (53) | 199 (54)    | 55 (47)  |
| Female                                                                           | 217 (45) | 163 (44)    | 54 (47)  |
| Missing                                                                          | 11 (2)   | 4 (1)       | 7 (6)    |
| <b>Living area<sup>1</sup></b>                                                   |          |             |          |
| Urban                                                                            | 151 (31) | 118 (32)    | 33 (28)  |
| Rural                                                                            | 315 (65) | 242 (66)    | 73 (63)  |
| Missing                                                                          | 16 (3)   | 6 (2)       | 10 (9)   |
| <b>Marital status</b>                                                            |          |             |          |
| Single                                                                           | 159 (33) | 123 (34)    | 36 (31)  |
| Couple                                                                           | 243 (50) | 183 (50)    | 60 (52)  |
| Widowed                                                                          | 79 (16)  | 59 (16)     | 20 (17)  |
| Missing                                                                          | 1 (0.2)  | 1 (0.3)     | 0 (0)    |
| <b>Hospitalization within last 12 months</b>                                     | 193 (40) | 135 (37)    | 58 (50)  |
| <b>Medication<sup>2</sup></b>                                                    |          |             |          |
| Antineoplastic and immunomodulating agents at admission                          | 27 (6)   | 18 (5)      | 9 (8)    |
| Nervous system at admission                                                      | 339 (70) | 252 (69)    | 87 (75)  |
| Systemic hormonal preparations, excluding sex hormones and insulins at discharge | 105 (22) | 73 (20)     | 32 (28)  |
| <b>High costs during hospitalization<sup>3</sup></b>                             |          |             |          |
| For imaging procedures                                                           | 118 (24) | 76 (21)     | 42 (36)  |
| For laboratory analysis                                                          | 117 (24) | 56 (15)     | 61 (53)  |
| <b>High nurse workload<sup>4</sup></b>                                           | 117 (24) | 57 (15.6)   | 60 (52)  |
| <b>Charlson Comorbidity Index</b>                                                | 2 [0; 4] | 2.00 [0; 3] | 3 [1; 5] |
| <b>Principal or concomitant diagnosis at discharge</b>                           |          |             |          |
| Cancer <sup>5</sup>                                                              | 50 (10)  | 50 (10)     | 50 (10)  |
| COPD <sup>6</sup>                                                                | 32 (9)   | 32 (8)      | 32 (9)   |
| Dementia <sup>7</sup>                                                            | 18 (15)  | 18 (15)     | 18 (15)  |
| Depression <sup>8</sup>                                                          | 47 (10)  | 47 (10)     | 47 (10)  |
| Heart failure <sup>9</sup>                                                       | 33 (9)   | 33 (9)      | 33 (9)   |
| Pneumonia <sup>10</sup>                                                          | 14 (12)  | 14 (12)     | 14 (12)  |
| Sepsis <sup>11</sup>                                                             | 43 (9)   | 43 (9)      | 43 (9)   |
| Stroke <sup>12</sup>                                                             | 36 (10)  | 36 (9)      | 36 (10)  |
| Substance abuse <sup>13</sup>                                                    | 7 (6)    | 7 (6)       | 7 (6)    |
| Syncope <sup>14</sup>                                                            | 61 (13)  | 61 (13)     | 61 (13)  |

<sup>1</sup> Defined according to the Swiss Federal Statistical Office based on place of residence

<sup>2</sup> Group of drugs according to ATC classification

<sup>3</sup> Defined as costs of all imaging procedures or medication during hospital stay above 75<sup>th</sup> percentile

<sup>4</sup> Defined as sum of hours of all nursing work (incl. sitting guard) during hospital stay above 75<sup>th</sup> percentile

<sup>5</sup> ICD10-codes B21, C00 through C97, Z03.1

<sup>6</sup> ICD10-codes J44

<sup>7</sup> ICD10-codes F00 through F03, F05.0, F05.1

<sup>8</sup> ICD10-codes F20.4, F25.1, F31.3 F31.4, F31.5, F32, F33, F41.2, F92.0

<sup>9</sup> ICD10-codes I50

<sup>10</sup> ICD10-codes A48.1, B01.2, B05.2, J10.0, J11.0, J12 through J18, J68.0, J69, J85.1, O74.0, U69.00

<sup>11</sup> ICD10-codes A02.1, A20.7, A22.7, A26.7, A32.7, A39.2, A39.3, A39.4, A40, A41, A42.7, B37.7

<sup>12</sup> ICD10-codes I63

<sup>13</sup> ICD10-codes F10 through F19, F53, F66.8, F66.9

<sup>14</sup> ICD10-codes R55

|                                                        |           |          |          |
|--------------------------------------------------------|-----------|----------|----------|
| Malnutrition <sup>15</sup>                             | 46 (13)   | 46 (13)  | 46 (13)  |
| <b>Multimorbidity</b>                                  |           |          |          |
| Low (number of diagnoses ≤ 6)                          | 123 (25)  | 113 (31) | 10 (9)   |
| Middle (number of diagnoses > 6 and <14) <sup>16</sup> | 199 (41)  | 160 (44) | 39 (34)  |
| High (number of diagnoses ≥ 14)                        | 149 (31)  | 89 (24)  | 60 (52)  |
| <b>PCCL</b>                                            |           |          |          |
| No complication or comorbidity                         | 83 (1)    | 73 (20)  | 10 (9)   |
| Light complication or comorbidity                      | 7 (1)     | 6 (2)    | 1 (0.9)  |
| Moderate complication or comorbidity                   | 81 (17)   | 72 (20)  | 9 (8)    |
| Severe complication or comorbidity                     | 143 (30)  | 120 (33) | 23 (20)  |
| Very severe complication or comorbidity                | 157 (33)  | 91 (24)  | 66 (57)  |
| Missing                                                | 11 (2)    | 4 (1)    | 7 (6)    |
| <b>Abnormal creatinine level<sup>17</sup></b>          |           |          |          |
| At admission and discharge                             | 90 (19)   | 60 (16)  | 30 (26)  |
| At admission only                                      | 54 (11)   | 34 (9)   | 20 (17)  |
| At discharge only                                      | 13 (2.7)  | 10 (3)   | 3 (3)    |
| Missing                                                | 89 (18)   | 82 (22)  | 7 (6)    |
| <b>Leukocytosis<sup>18</sup></b>                       |           |          |          |
| At admission and discharge                             | 4 (0.8)   | 2 (0)    | 2 (2)    |
| At admission only                                      | 17 (3)    | 12 (3)   | 5 (4)    |
| At discharge only                                      | 2 (0.4)   | 2 (0.5)  | 0 (0)    |
| Missing                                                | 91 (19)   | 83 (23)  | 8 (7)    |
| <b>Patient destination</b>                             |           |          |          |
| Death                                                  | 134 (7)   | 91 (7)   | 43 (8)   |
| Home                                                   | 1178 (62) | 873 (66) | 305 (54) |
| Hospital                                               | 191 (10)  | 119 (9)  | 72 (13)  |
| Nursing home                                           | 155 (8)   | 108 (8)  | 47 (8)   |
| Rehabilitation                                         | 171 (9)   | 101 (8)  | 70 (12)  |
| Others and missing                                     | 60 (3)    | 34 (3)   | 26 (5)   |

<sup>15</sup> ICD10-codes E40 through E46

<sup>16</sup> Between 25<sup>th</sup> and 75<sup>th</sup> percentile

<sup>17</sup> Defined as creatinine ≥100 µmol/l

<sup>18</sup> Defined as leukocyte count ≥20 G/l
