# Supplementary material for: Development and validation of a score to assess complexity of general internal medicine patients at hospital discharge: a prospective cohort study
Source: PubMed Central journal article supplement — BMJ Open. 2021 May 6;11(5):e041205. doi: 10.1136/bmjopen-2020-041205 (PMC8103941; doi:10.1136/bmjopen-2020-041205), 2021-05-06

**Supplementary figure S1. Decision curve analysis. A, derivation dataset. B, validation dataset.**

CCI, Charlson comorbidity index.

A)

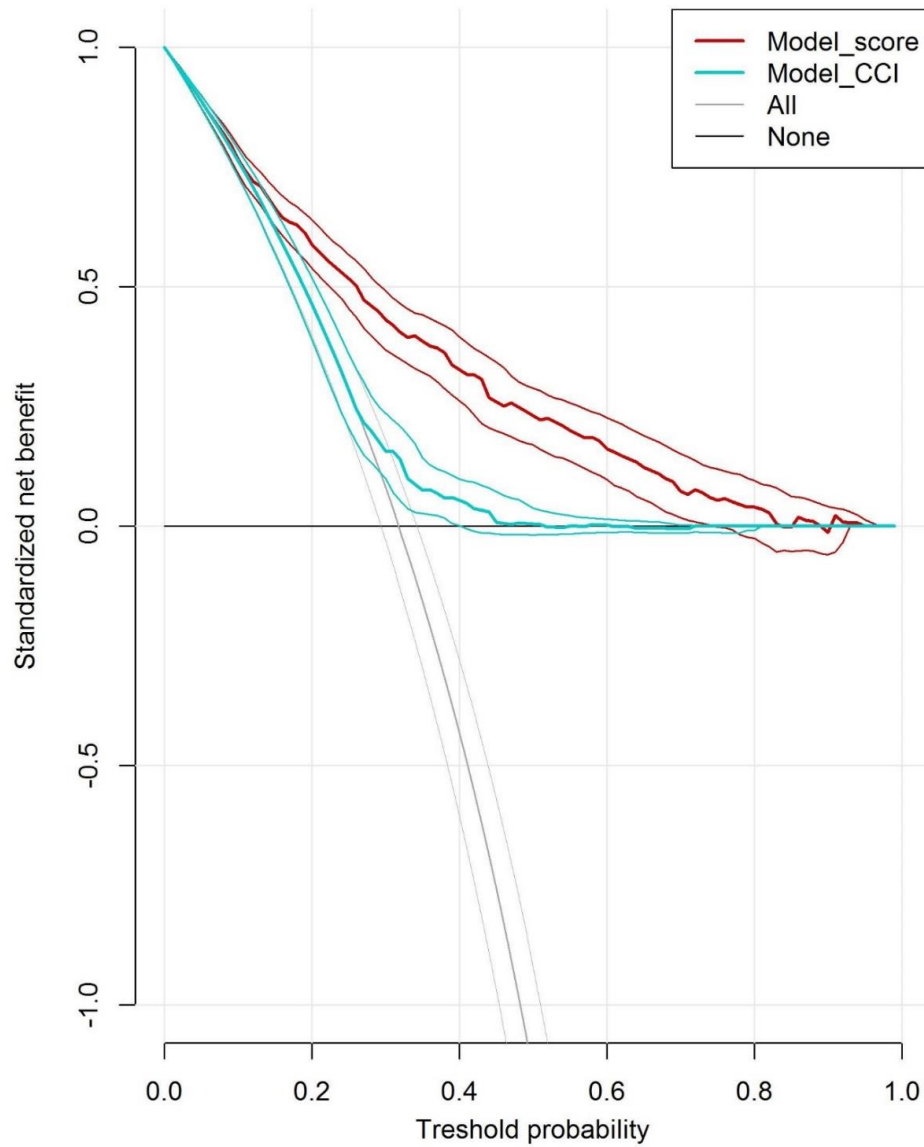

B)

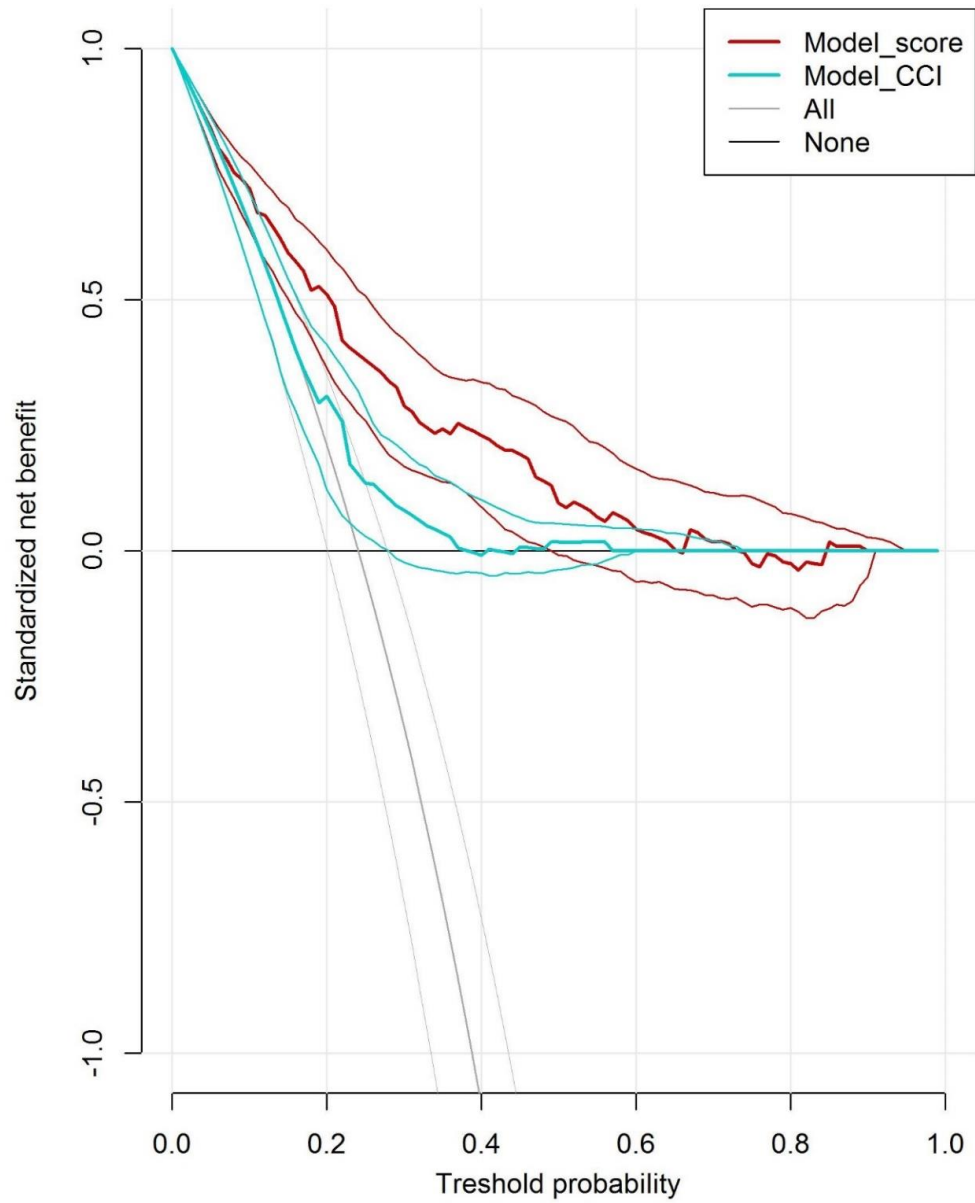

**Supplementary figure S2.** A, PCA score, derivation dataset. B, PCA score, validation dataset. C, PCCL, derivation dataset. D, PCCL, validation dataset. E, CCI, derivation dataset. F, CCI, validation dataset.

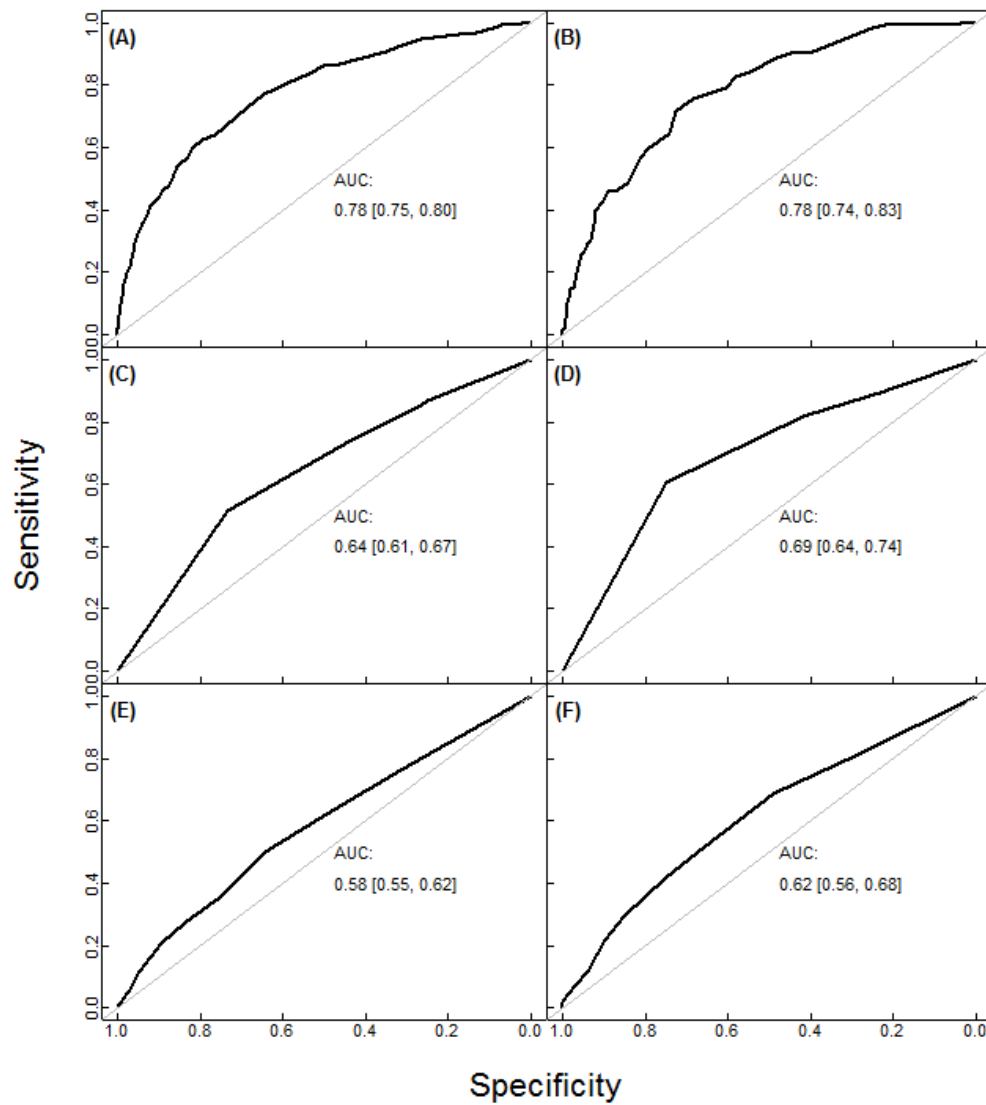

Supplement: bmjopen-2020-041205supp002.pdf [file bmjopen-2020-041205supp002.pdf]
